# Supplementary material for: Isolable acetylene complexes of copper and silver
Source: Royal Society of Chemistry journal article supplement (doi:10.1039/d2sc02377f), 2022-01-01
Supplement: d2sc02377f1.pdf [file d2sc02377f1.pdf]

## Isolable acetylene complexes of copper and silver

Anurag Noonikara-Poyil,<sup>a</sup> Shawn G. Ridlen,<sup>a</sup> Israel Fernández,<sup>b,\*</sup> and H. V. Rasika Dias<sup>a,\*</sup>

### Affiliations:

<sup>a</sup> Department of Chemistry and Biochemistry, The University of Texas at Arlington, Arlington, Texas 76019, United States.

<sup>b</sup> Departamento de Química Orgánica I and Centro de Innovación en Química Avanzada (ORFEO-CINQA), Facultad de Ciencias Químicas, Universidad Complutense de Madrid, 28040-Madrid, Spain.

### Table of Contents

|                                                                                                 |      |
|-------------------------------------------------------------------------------------------------|------|
| General Information.....                                                                        | S-2  |
| Synthesis and characterization of metal complexes.....                                          | S-3  |
| <sup>1</sup> H, <sup>13</sup> C, <sup>19</sup> F NMR, and Raman Spectra of Metal Complexes..... | S-8  |
| Compound stability tests.....                                                                   | S-24 |
| X-ray Data Collection and Structure Determinations.....                                         | S-25 |
| Computational Details.....                                                                      | S-56 |
| References.....                                                                                 | S-73 |

**General Information**

All manipulations were carried out under an atmosphere of purified nitrogen using standard Schlenk techniques or in a MBraun glovebox equipped with a -25 °C refrigerator. Solvents were purchased from commercial sources and purified before use. NMR spectra were recorded at 25 °C on a JEOL Eclipse 500 spectrometer ( $^1\text{H}$ , 500.16 MHz  $^{13}\text{C}$ , 125.78 MHz, and  $^{19}\text{F}$ , 470.62 MHz) unless otherwise noted.  $^1\text{H}$  and  $^{13}\text{C}$  NMR spectra are referenced to the solvent peak ( $^1\text{H}$ ;  $\text{CDCl}_3$   $\delta$  7.26,  $\text{CD}_2\text{Cl}_2$   $\delta$  5.32,  $(\text{CD}_3)_2\text{CO}$   $\delta$  2.05,  $^{13}\text{C}$ ;  $\text{CDCl}_3$   $\delta$  77.16,  $\text{CD}_2\text{Cl}_2$   $\delta$  53.84,  $(\text{CD}_3)_2\text{CO}$   $\delta$  29.84).  $^1\text{H}$  NMR coupling constants (J) are reported in Hertz (Hz) and multiplicities are indicated as follows: s (singlet), d (doublet), t (triplet), q (quartet), m (multiplet).  $^{19}\text{F}$  NMR values were referenced to external  $\text{CFCl}_3$ . Melting points were obtained on a Mel-Temp II apparatus and were not corrected. Elemental analyses were performed using a Perkin-Elmer Model 2400 CHN analyzer. IR spectra were collected at room temperature on a Shimadzu IR Prestige-21 FTIR containing an ATR attachment using pure liquid or solid materials, with instrument resolution at  $2\text{ cm}^{-1}$ . Raman data were collected on a Thermo Scientific DXR3 Raman microscope with a HeNe laser source of 633 nm, by placing pure solid materials on a glass slide.  $[\text{Ph}_2\text{B}(3\text{-(CF}_3\text{)Pz})_2\text{Cu}(\text{C}_2\text{H}_4)]$ ,<sup>1</sup>  $[\text{HB}(3,5\text{-(CF}_3\text{)}_2\text{Pz})_3\text{Cu}(\text{C}_2\text{H}_4)]$ ,<sup>2</sup>  $[\{\text{H}_2\text{C}(3,5\text{-(CH}_3\text{)}_2\text{Pz})_2\}\text{Cu}(\text{NCMe})][\text{BF}_4]$ ,<sup>3</sup>  $[\{\text{H}_2\text{C}(3,5\text{-(CH}_3\text{)}_2\text{Pz})_2\}\text{Ag}(\text{C}_2\text{H}_4)][\text{SbF}_6]$ ,<sup>3</sup>  $[\text{Ph}_2\text{B}(3\text{-(CF}_3\text{)}_2\text{Pz})_2\text{Ti}]$ ,<sup>1</sup> and  $[\text{HB}(3\text{-(CF}_3\text{)},5\text{-(Ph)Pz})_3\text{Na}(\text{THF})]$ <sup>4</sup> were synthesized according to the literature procedure. All other reactants and reagents were purchased from commercial sources. Heating was accomplished by either a heating mantle or a silicone oil bath.

**Warning.** *Copper and silver in combination with acetylene gas can lead to potentially explosive materials and should be prepared in small quantities and handled with appropriate precautions. While no difficulties were encountered with the complexes reported herein, due caution should be exercised. Due care must also be taken when working with acetylene gas. It is known to produce explosive combinations with oxygen.*

## Synthesis and Characterization of Metal complexes

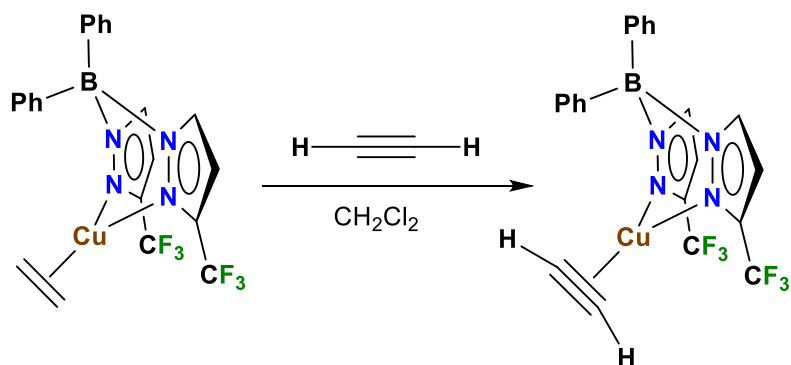

**[Ph<sub>2</sub>B(3-(CF<sub>3</sub>)Pz)<sub>2</sub>]Cu(C<sub>2</sub>H<sub>2</sub>) (9):** [Ph<sub>2</sub>B(3-(CF<sub>3</sub>)<sub>2</sub>Pz)<sub>2</sub>]Cu(C<sub>2</sub>H<sub>4</sub>) (0.15 g, 0.28 mmol) was dissolved in 5 mL dichloromethane and stirred for ~3-5 min while bubbling acetylene. The reaction mixture was concentrated with continuous flow of acetylene and kept at -20 °C to obtain X-ray quality colorless crystals of [Ph<sub>2</sub>B(3-(CF<sub>3</sub>)<sub>2</sub>Pz)<sub>2</sub>]Cu(C<sub>2</sub>H<sub>2</sub>). Yield: 98%. M.P.: 118-120 °C (decomposition). Anal. Calc. C<sub>22</sub>H<sub>16</sub>BCuF<sub>6</sub>N<sub>4</sub>: C, 50.36; H, 3.07%; N, 10.68%. Found: C, 50.10%; H, 3.25%; N, 10.28%. <sup>1</sup>H NMR (CDCl<sub>3</sub>, 500.16 MHz, 298 K): δ (ppm) 7.64 (s, br, 2H, PzH), 7.25-7.23 (m, 6H, PhH), 6.90 (br, 4H, PhH), 6.56 (d, *J* = 2.0 Hz, 2H, PzH), 4.22 (s, 2H, C<sub>2</sub>H<sub>2</sub>). <sup>19</sup>F NMR (CDCl<sub>3</sub>, 470.62 MHz, 298 K): δ (ppm) -60.3 (s). <sup>13</sup>C{<sup>1</sup>H} NMR (CDCl<sub>3</sub>, 125.77 MHz, 298 K): δ (ppm) 146.3 (br), 142.8 (q, <sup>2</sup>*J*<sub>C-F</sub> = 37.2 Hz, C-3), 138.3, 134.5 (br), 127.6, 127.4, 121.1 (q, <sup>1</sup>*J*<sub>C-F</sub> = 269.9 Hz, CF<sub>3</sub>), 103.9 (C-4), 78.7 (C≡C). IR (cm<sup>-1</sup>): 3202, 2932, 2212, 1807 (C≡C), 1523, 1496, 1433, 1369, 1275, 1259, 1211, 1084, 1078, 1012, 1003, 976. Raman (cm<sup>-1</sup>): 3149, 3050, 1807(C≡C), 1593, 1522, 1372, 1176, 1143, 1032, 1000, 978.

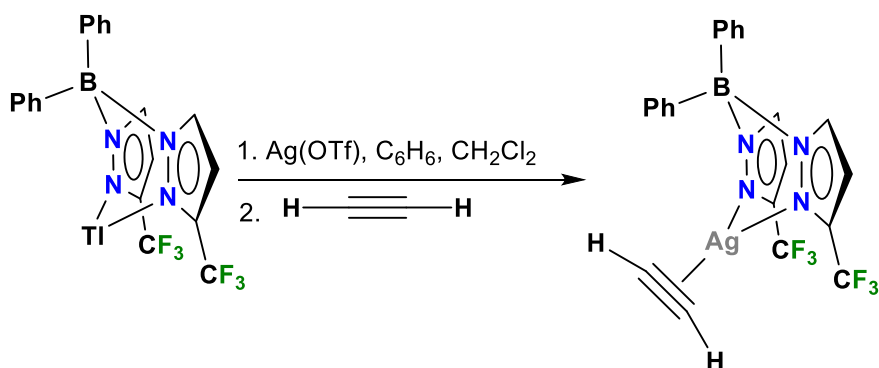

**[Ph<sub>2</sub>B(3-(CF<sub>3</sub>)Pz)<sub>2</sub>]Ag(C<sub>2</sub>H<sub>2</sub>) (10):** [Ph<sub>2</sub>B(3-(CF<sub>3</sub>)<sub>2</sub>Pz)<sub>2</sub>]TI (0.10 g, 0.16 mmol) and Ag(OTf) (0.044 g, 0.17 mmol) were placed in a Schlenk flask under nitrogen atmosphere. CH<sub>2</sub>Cl<sub>2</sub> (10 mL) and benzene (1.0 mL) were combined in a separate Schlenk flask and slowly added via syringe. The resulting solution was stirred for 4 h at room temperature and filtered through a bed of

celite to remove a white precipitate. The resulting solution was concentrated to ~25% volume under reduced pressure and purified acetylene was gently bubbled through the solution for 2 minutes. The resulting mixture was placed in a freezer maintained at -20 °C to obtain colorless X-ray quality crystals of  $[\text{Ph}_2\text{B}(3\text{-(CF}_3)_2\text{Pz})_2]\text{Ag}(\text{C}_2\text{H}_2)$ . Yield: 52%. M.P.: 109-112 °C (decomposition).  $^1\text{H}$  NMR ( $\text{CDCl}_3$ , 500.16 MHz, 298 K):  $\delta$  (ppm) 7.71 (s, br, 2H, PzH), 7.25 (m, br, 6H, PhH), 6.91 (br, 4H, PhH), 6.50 (d,  $J = 2.3$  Hz, 2H, PzH), 2.13 (s, 2H,  $\text{C}_2\text{H}_2$ ).  $^{19}\text{F}$  NMR ( $\text{CDCl}_3$ , 470.62 MHz, 298 K):  $\delta$  (ppm) -61.3 (s).  $^{13}\text{C}\{^1\text{H}\}$  NMR ( $\text{CDCl}_3$ , 125.77 MHz, 298 K):  $\delta$  (ppm) 147.3 (br), 142.7 (q,  $^2J_{\text{C-F}} = 35.6$  Hz, C-3), 138.7, 134.6 (br), 127.6, 127.0, 121.5 (q,  $^1J_{\text{C-F}} = 268.7$  Hz,  $\text{CF}_3$ ), 102.8 (C-4), 70.9 ( $\text{C}\equiv\text{C}$ ). IR ( $\text{cm}^{-1}$ ): 3009, 2928, 1531, 1524, 1495, 1433, 1424, 1370, 1274, 1268, 1258, 1194, 1184, 1166, 1159, 1077, 1013, 976, 955. Note: This compound loses acetylene in solution. The NMR data were collected in excess acetylene (some acetylene was added to the headspace of NMR tube) to minimize the formation of acetylene dissociated product. NMR spectra show two different species, desired product and acetylene dissociated molecule.

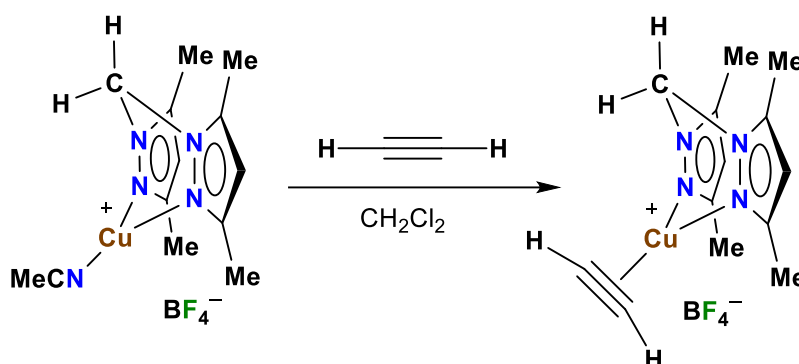

$[\{\text{H}_2\text{C}(3,5\text{-(CH}_3)_2\text{Pz})_2\}\text{Cu}(\text{C}_2\text{H}_2)][\text{BF}_4]$  (**11**):  $[\{\text{H}_2\text{C}(3,5\text{-(CH}_3)_2\text{Pz})_2\}\text{Cu}(\text{NCMe})][\text{BF}_4]$  (0.15 g, 0.38 mmol) was dissolved in 10 mL dichloromethane and stirred for ~3-5 min while bubbling acetylene. The reaction mixture was concentrated with continuous flow of acetylene and kept at -20 °C to obtain X-ray quality colorless crystals of  $[\{\text{H}_2\text{C}(3,5\text{-(CH}_3)_2\text{Pz})_2\}\text{Cu}(\text{C}_2\text{H}_2)][\text{BF}_4]$ . Yield: 97%. M.P.: 113.-115 °C (decomposition). Anal. Calc.  $\text{C}_{13}\text{H}_{18}\text{BCuF}_4\text{N}_4$ : C, 41.02%; H, 4.77%; N, 14.72%. Found: C, 40.61%; H, 4.45%; N, 14.12%.  $^1\text{H}$  NMR ( $(\text{CD}_3)_2\text{CO}$ , 500.16 MHz, 298 K):  $\delta$  (ppm) 6.56 (s, 2H,  $\text{CH}_2$ ), 6.20 (s, 2H, PzH), 5.14 (s, br, 2H,  $\text{C}_2\text{H}_2$ ), 2.56 (s, 6H,  $\text{CH}_3$ ), 2.33 (s, 6H,  $\text{CH}_3$ ).  $^{13}\text{C}\{^1\text{H}\}$  NMR ( $(\text{CD}_3)_2\text{CO}$ , 125.77 MHz, 298 K):  $\delta$  (ppm) 153.0 (C-3/C-5), 143.9 (C-3/C-5), 108.0 (C-4), 79.5 ( $\text{C}\equiv\text{C}$ ), 57.2 ( $\text{CH}_2$ ), 13.8 ( $\text{CH}_3$ ), 10.9 ( $\text{CH}_3$ ). IR ( $\text{cm}^{-1}$ ): 3233, 3257, 2927, 2854, 1812 ( $\text{C}\equiv\text{C}$ ), 1557, 1468, 1441, 1437, 1420, 1393, 1385, 1284, 1275, 1148, 1051, 1038, 1003, 976, 961. Raman ( $\text{cm}^{-1}$ ): 2976, 2957, 2933, 1812 ( $\text{C}\equiv\text{C}$ ), 1762, 1699, 1658, 1461, 1389, 1275, 1254, 1052.

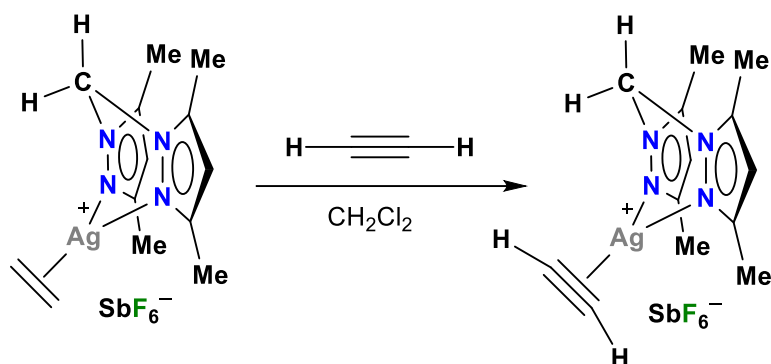

**[{H<sub>2</sub>C(3,5-(CH<sub>3</sub>)<sub>2</sub>Pz)<sub>2</sub>}Ag(C<sub>2</sub>H<sub>2</sub>)] [SbF<sub>6</sub>] (12):** [{H<sub>2</sub>C(3,5-(CH<sub>3</sub>)<sub>2</sub>Pz)<sub>2</sub>}Ag(C<sub>2</sub>H<sub>4</sub>)] [SbF<sub>6</sub>] (0.15 g, 0.26 mmol) was dissolved in 10 mL dichloromethane and stirred for ~2-3 min while bubbling acetylene. The reaction mixture was concentrated with continuous flow of acetylene and kept at -20 °C to obtain X-ray quality colorless crystals of [{H<sub>2</sub>C(3,5-(CH<sub>3</sub>)<sub>2</sub>Pz)<sub>2</sub>}Ag(C<sub>2</sub>H<sub>2</sub>)] [SbF<sub>6</sub>]. Yield: 93%. M.P.: 119-122 °C (decomposition). Anal. Calc. C<sub>13</sub>H<sub>18</sub>AgF<sub>6</sub>N<sub>4</sub>Sb: C, 27.21; H, 3.16%; N, 9.76%. Found: C, 26.91%; H, 2.90%; N, 9.71%. <sup>1</sup>H NMR (CD<sub>2</sub>Cl<sub>2</sub>, 500.16 MHz, 298 K): δ (ppm) 6.35 (s, 2H, CH<sub>2</sub>), 6.22 (s, 2H, PzH), 2.39 (s, 6H, CH<sub>3</sub>), 2.31 (s, 6H, CH<sub>3</sub>), 2.25 (s, 2H, C<sub>2</sub>H<sub>2</sub>). <sup>13</sup>C{<sup>1</sup>H} NMR (CD<sub>2</sub>Cl<sub>2</sub>, 125.77 MHz, 298 K): δ (ppm) 153.2 (C-3/C-5), 145.3 (C-3/C-5), 109.1 (C-4), 71.7 (C≡C), 61.2 (CH<sub>2</sub>), 15.1 (CH<sub>3</sub>), 11.8 (CH<sub>3</sub>). IR (cm<sup>-1</sup>): 3198, 2933, 2860, 2366, 1557, 1466, 1422, 1392, 1384, 1285, 1232, 1155, 1043, 981.

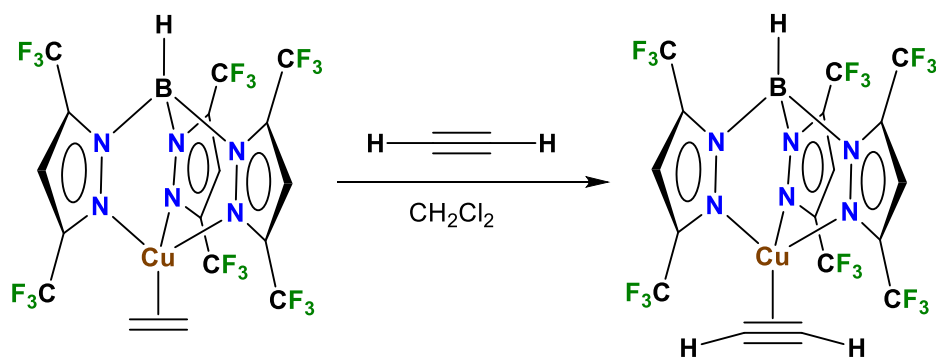

**[HB(3,5-(CF<sub>3</sub>)<sub>2</sub>Pz)<sub>3</sub>]Cu(C<sub>2</sub>H<sub>2</sub>) (13):** [HB(3,5-(CF<sub>3</sub>)<sub>2</sub>Pz)<sub>3</sub>]Cu(C<sub>2</sub>H<sub>4</sub>) (0.15 g, 0.21 mmol) was dissolved in 5 mL dichloromethane and stirred for ~3-5 min while bubbling acetylene. The remaining solvent was evaporated to obtain [HB(3,5-(CF<sub>3</sub>)<sub>2</sub>Pz)<sub>2</sub>]Cu(C<sub>2</sub>H<sub>2</sub>) as white powder. X-ray quality colorless crystals of [HB(3,5-(CF<sub>3</sub>)<sub>2</sub>Pz)<sub>3</sub>]Cu(C<sub>2</sub>H<sub>2</sub>) was obtained in acetylene saturated toluene at -20 °C. Yield: 98%. M.P.: 135-138 °C (decomposition). Anal. Calc. C<sub>17</sub>H<sub>6</sub>BCuF<sub>18</sub>N<sub>6</sub>: C, 28.73; H, 0.85%; N, 11.83%. Found: C, 29.15%; H, 1.10%; N, 12.20%. <sup>1</sup>H NMR (CDCl<sub>3</sub>, 500.16 MHz, 298 K): δ (ppm) 6.94 (s, 3H, PzH), 4.50 (s, 2H, C<sub>2</sub>H<sub>2</sub>). <sup>19</sup>F NMR (CDCl<sub>3</sub>, 470.62 MHz, 298 K): δ (ppm) -59.2(s), -60.7(s). <sup>13</sup>C{<sup>1</sup>H} NMR (CDCl<sub>3</sub>, 125.77 MHz, 298 K): δ (ppm) 143.5 (q, <sup>2</sup>J<sub>C-F</sub> = 39.6 Hz, C-3/C-5), 140.0 (q, <sup>2</sup>J<sub>C-F</sub> = 38.4 Hz, C-3/C-5), 120.0 (q, <sup>1</sup>J<sub>C-F</sub> = 269.9 Hz, CF<sub>3</sub>),

119.1 (q,  $^1J_{C-F}=271.1$  Hz, CF<sub>3</sub>), 107.1 (C-4), 75.8 (C≡C). IR (cm<sup>-1</sup>): 3235, 2932, 2623 (B-H), 1849 (C≡C), 1558, 1497, 1396, 1368, 1265, 1247, 1178, 1134, 1098, 1080, 1042, 999, 989. Raman (cm<sup>-1</sup>): 3321, 3224, 3169, 2704, 1845 (C≡C), 1762, 1699, 1658, 1500, 1472, 1386, 1259, 993.

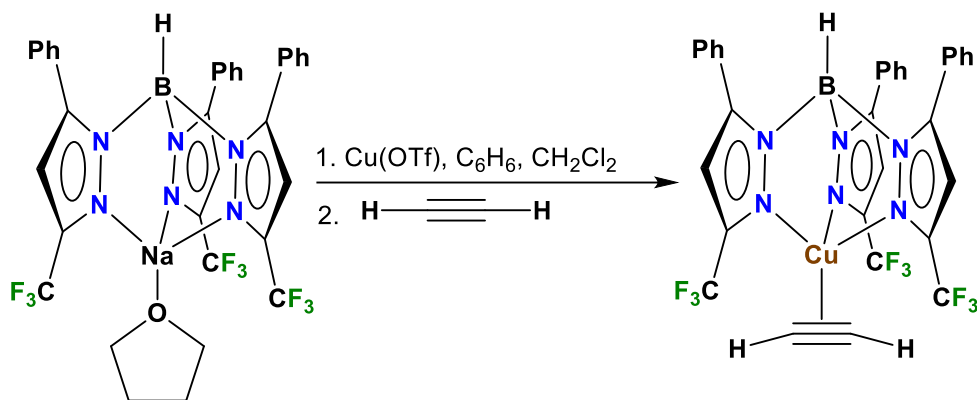

**[HB(3-(CF<sub>3</sub>),5-(Ph)Pz)<sub>3</sub>]Cu(C<sub>2</sub>H<sub>2</sub>) (14):** [HB(3-(CF<sub>3</sub>),5-(Ph)Pz)<sub>3</sub>]Na(THF) (0.200 g, 0.270 mmol) and [CuOTf]<sub>2</sub>·C<sub>6</sub>H<sub>6</sub> (0.076 g, 0.151 mmol) were placed in a Schlenk flask under nitrogen atmosphere. CH<sub>2</sub>Cl<sub>2</sub> (20 mL) and benzene (2.0 mL) were combined in a separate Schlenk flask and slowly added via syringe. The resulting solution was stirred overnight at room temperature and filtered through a bed of Celite to remove a white precipitate. The resulting solution was concentrated to ~25% volume under reduced pressure and purified acetylene was gently bubbled through the solution for 2 minutes. The resulting mixture was placed in a freezer maintained at -20 °C to obtain colorless X-ray quality crystals. Yield: 0.136 g, 69%. M.P.: 103-154 °C (slowly decomposes over this wide temperature range with a final melting point of the residue at 225 °C). Analysis Calcd. for C<sub>32</sub>H<sub>21</sub>CuBF<sub>9</sub>N<sub>6</sub>: C, 52.30; H, 2.88; N, 11.44%. Found. C, 52.43; H, 2.76; N, 11.59%. <sup>1</sup>H NMR (CDCl<sub>3</sub>, 500.16 MHz, 298 K): δ (ppm) 7.27 (t, 3H, Ph-H, *J* = 7.5 Hz), 6.94 (t, 6H, Ph-H, *J* = 7.7 Hz), 6.87 (d, 6H, Ph-H, *J* = 7.2 Hz), 6.56 (s, 3H, PzH), 4.66 (s, 2H, C<sub>2</sub>H<sub>2</sub>). <sup>19</sup>F NMR (CD<sub>2</sub>Cl<sub>2</sub>, 470.62 MHz, 298 K): δ (ppm) -60.0 (s). <sup>13</sup>C{<sup>1</sup>H} NMR (CDCl<sub>3</sub>, 125.77 MHz, 298 K) δ (ppm): 150.4 (s, C(C<sub>6</sub>H<sub>5</sub>)), 142.7 (q, <sup>2</sup>*J*<sub>C-F</sub> = 38.4 Hz, CCF<sub>3</sub>), 130.6 (Ph), 129.8 (Ph), 128.5 (Ph), 128.0 (Ph), 121.2 (q, <sup>1</sup>*J*<sub>C-F</sub> = 272.3 Hz, CF<sub>3</sub>), 105.3 (C-4), 76.5 (C<sub>2</sub>H<sub>2</sub>). <sup>1</sup>H NMR (CD<sub>2</sub>Cl<sub>2</sub>, 500.16 MHz, 298 K): δ (ppm) 7.28 (t, 3H, PhH, *J* = 7.5 Hz), 6.96 (t, 6H, PhH, *J* = 7.7 Hz), 6.89 (d, 6H, PhH, *J* = 7.5 Hz), 6.60 (s, 3H, CH), 4.72 (s, 2H, C<sub>2</sub>H<sub>2</sub>). <sup>19</sup>F NMR (CD<sub>2</sub>Cl<sub>2</sub>, 470.62 MHz, 298 K): δ (ppm) -60.3 (s). <sup>13</sup>C{<sup>1</sup>H} NMR (CD<sub>2</sub>Cl<sub>2</sub>, 125.77 MHz, 298 K): δ (ppm) 151.0 (C(C<sub>6</sub>H<sub>5</sub>)), 142.7 (q, <sup>2</sup>*J*<sub>C-F</sub> = 38.4 Hz, CCF<sub>3</sub>), 130.7 (Ph), 130.0 (Ph), 128.9 (Ph), 128.3 (Ph), 121.6 (q, <sup>1</sup>*J*<sub>C-F</sub> = 272.3 Hz, CF<sub>3</sub>), 105.5 (C-4), 76.8 (C<sub>2</sub>H<sub>2</sub>). IR (Selected peaks, cm<sup>-1</sup>): 2644 (B-H). Raman (Selected peaks, cm<sup>-1</sup>): 1829 (C≡C).

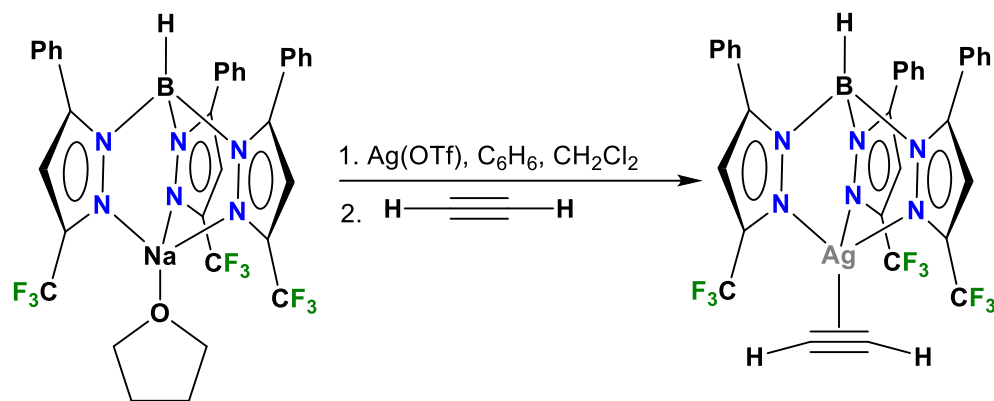

**[HB(3-(CF<sub>3</sub>),5-(Ph)Pz)<sub>3</sub>]Ag(C<sub>2</sub>H<sub>2</sub>) (15):** [HB(3-(CF<sub>3</sub>),5-(Ph)Pz)<sub>3</sub>]Na(THF) (0.25 g, 0.34 mmol) and AgOTf (0.095 g, 0.37 mmol) were placed in a Schlenk flask under nitrogen atmosphere. CH<sub>2</sub>Cl<sub>2</sub> (20 mL) and benzene (2.0 mL) were combined in a separate Schlenk flask and slowly added via syringe. The resulting solution was stirred overnight at room temperature and filtered through a bed of Celite to remove an orange precipitate. The resulting solution was concentrated to ~25% volume under reduced pressure and purified acetylene was gently bubbled through the solution for 2 minutes. The resulting mixture was placed in a freezer maintained at -20 °C to obtain colorless X-ray quality crystals. Yield: 0.186 g, 71%. M.P.: 103-148 °C (slowly decomposes over this wide temperature range with a final melting point of the residue at 225 °C). Analysis Calcd. for C<sub>32</sub>H<sub>21</sub>AgBF<sub>9</sub>N<sub>6</sub>: C, 49.32; H, 2.72; N, 10.79%. Found. C, 49.70; H, 2.64; N, 10.53%. <sup>1</sup>H NMR (CD<sub>2</sub>Cl<sub>2</sub>, 500.16 MHz, 298 K): δ (ppm) 7.23 (t, 3H, PhH, *J* = 7.5 Hz), 6.94 (t, 6H, PhH, *J* = 7.5 Hz), 6.89 (d, 6H, PhH, *J* = 6.9 Hz), 6.56 (s, 3H, CH), 4.72 (br, 1H, BH), 3.59 (s, 2H, C<sub>2</sub>H<sub>2</sub>). <sup>13</sup>C {<sup>1</sup>H} NMR (CD<sub>2</sub>Cl<sub>2</sub>, 125.77 MHz, 298 K): δ (ppm) 151.9 (s, C(C<sub>6</sub>H<sub>5</sub>)), 142.9 (q, <sup>2</sup>*J*<sub>C-F</sub> = 37.2 Hz, CCF<sub>3</sub>), 131.3 ( Ph), 130.0 (Ph), 128.5 (Ph), 128.2 (Ph), 122.0 (q, <sup>1</sup>*J*<sub>C-F</sub> = 268.7 Hz, CF<sub>3</sub>), 104.9 (CH), 66.7 (s, C<sub>2</sub>H<sub>2</sub>). <sup>19</sup>F NMR (CD<sub>2</sub>Cl<sub>2</sub>, 470.62 MHz, 298 K): δ (ppm) -61.3 (s). IR (Selected peaks, cm<sup>-1</sup>): 2629 (B-H). Raman (Selected peaks, cm<sup>-1</sup>): 1895 (C≡C).

$^1\text{H}$ ,  $^{13}\text{C}$ ,  $^{19}\text{F}$  NMR, and Raman Spectra of Metal Complexes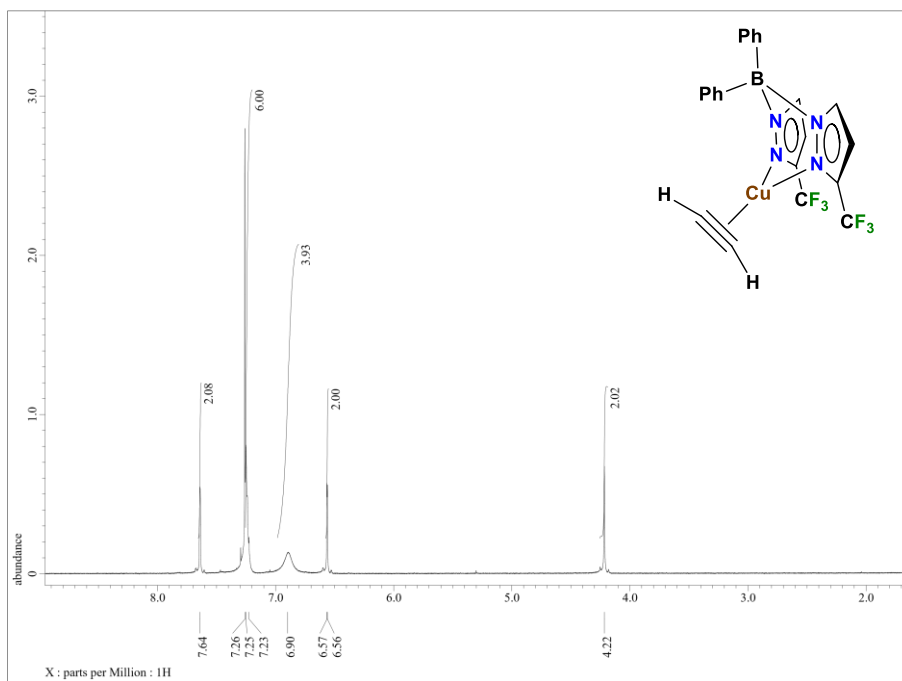**Figure S1:**  $^1\text{H}$  NMR Spectrum of  $[\text{Ph}_2\text{B}(3\text{-(CF}_3\text{)Pz})_2]\text{Cu}(\text{C}_2\text{H}_2)$  (9) in  $\text{CDCl}_3$ .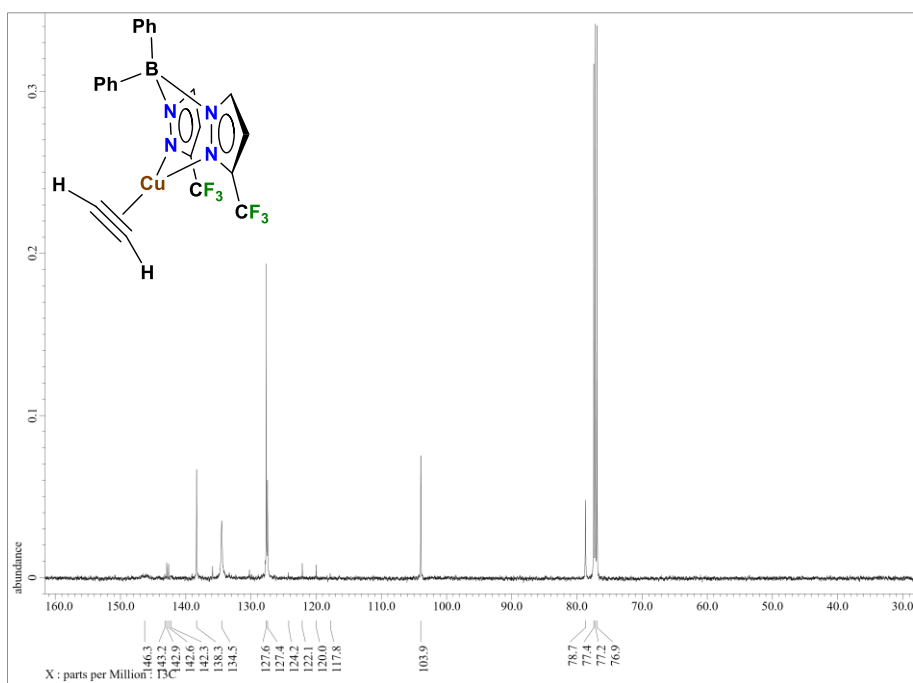**Figure S2:**  $^{13}\text{C}$  NMR Spectrum of  $[\text{Ph}_2\text{B}(3\text{-(CF}_3\text{)Pz})_2]\text{Cu}(\text{C}_2\text{H}_2)$  (9) in  $\text{CDCl}_3$ .



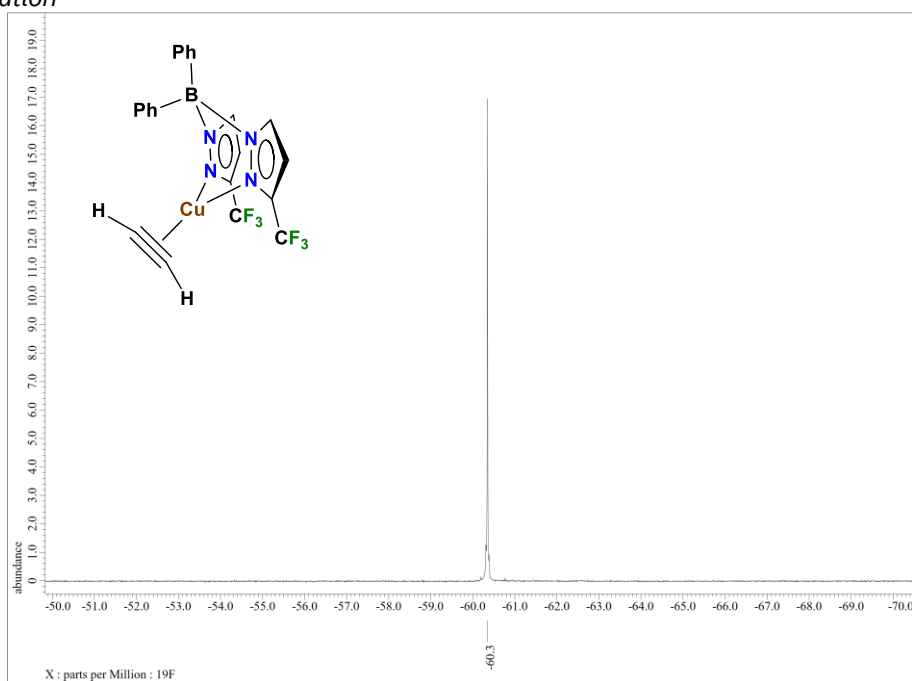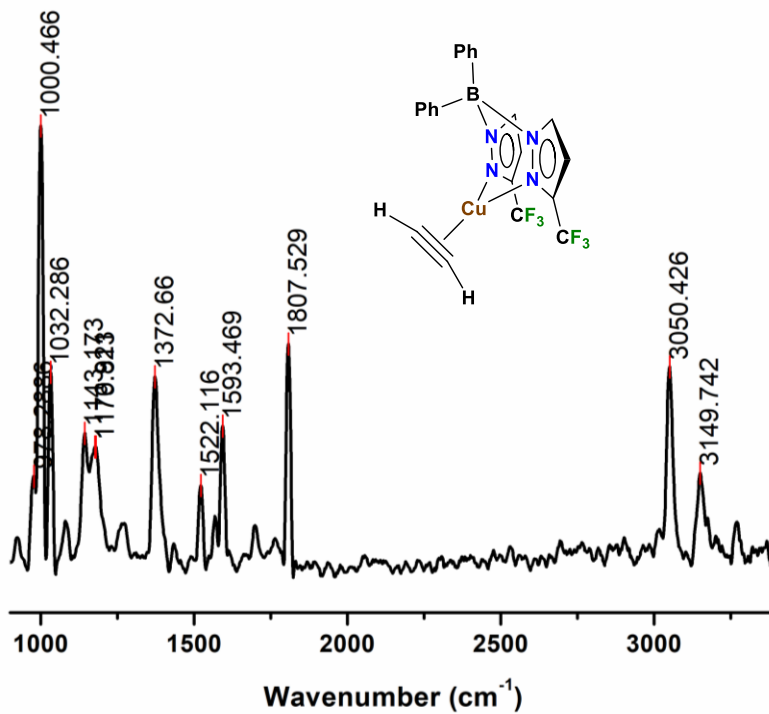

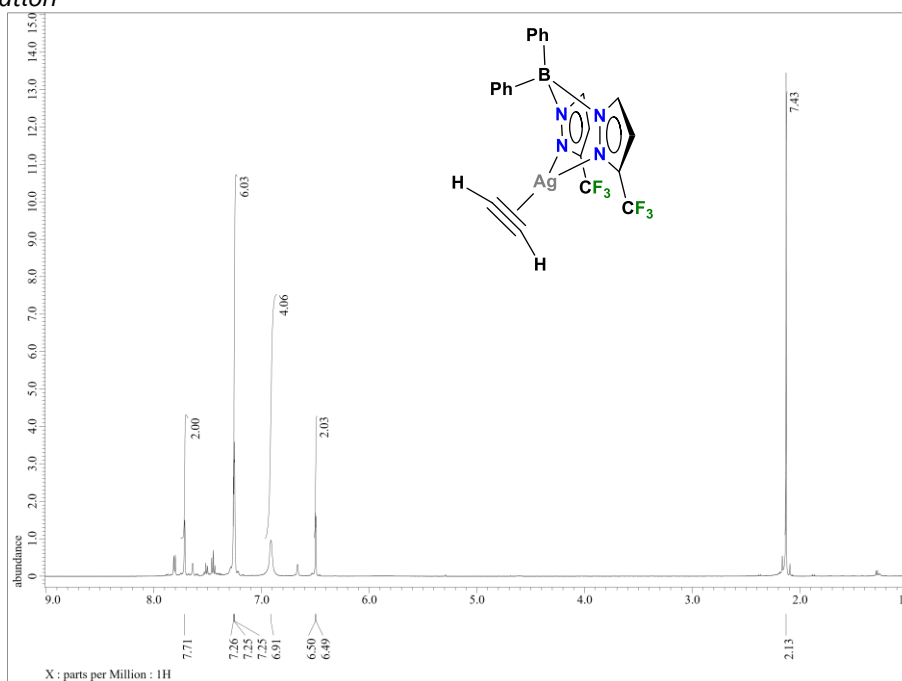

**Figure S5:**  $^1\text{H}$  NMR Spectrum of  $[\text{Ph}_2\text{B}(3\text{-(CF}_3\text{)Pz})_2]\text{Ag}(\text{C}_2\text{H}_2)$  (**10**) in  $\text{CDCl}_3$ . The NMR data were collected in the presence of excess acetylene (some  $\text{C}_2\text{H}_2$  was added to the headspace of the NMR tube).

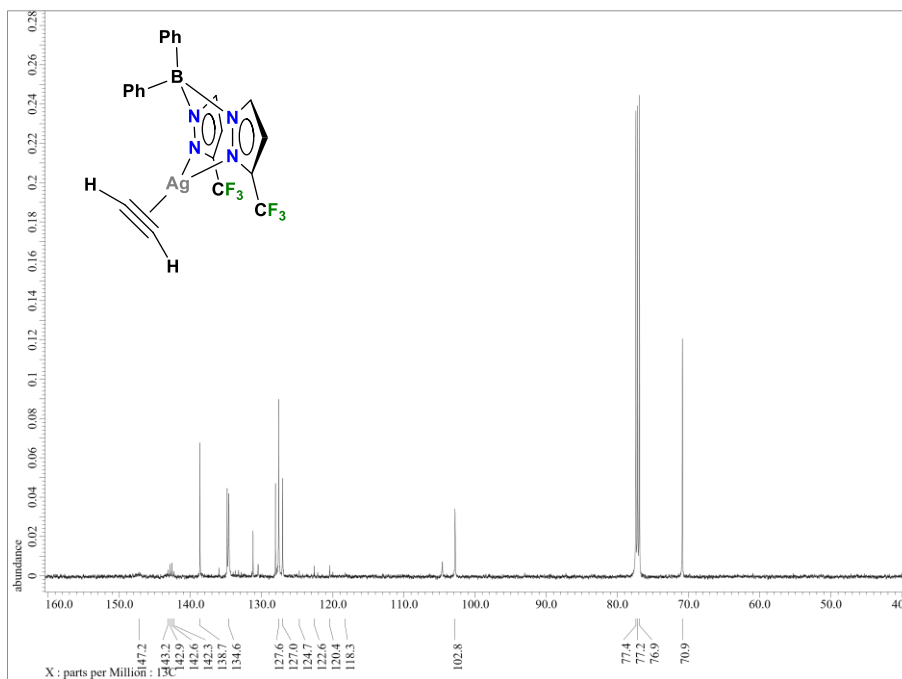

**Figure S6:**  $^{13}\text{C}$  NMR Spectrum of  $[\text{Ph}_2\text{B}(3\text{-(CF}_3\text{)Pz})_2]\text{Ag}(\text{C}_2\text{H}_2)$  (**10**) in  $\text{CDCl}_3$ . The NMR data were collected in the presence of excess acetylene (some  $\text{C}_2\text{H}_2$  was added to the headspace of the NMR tube).

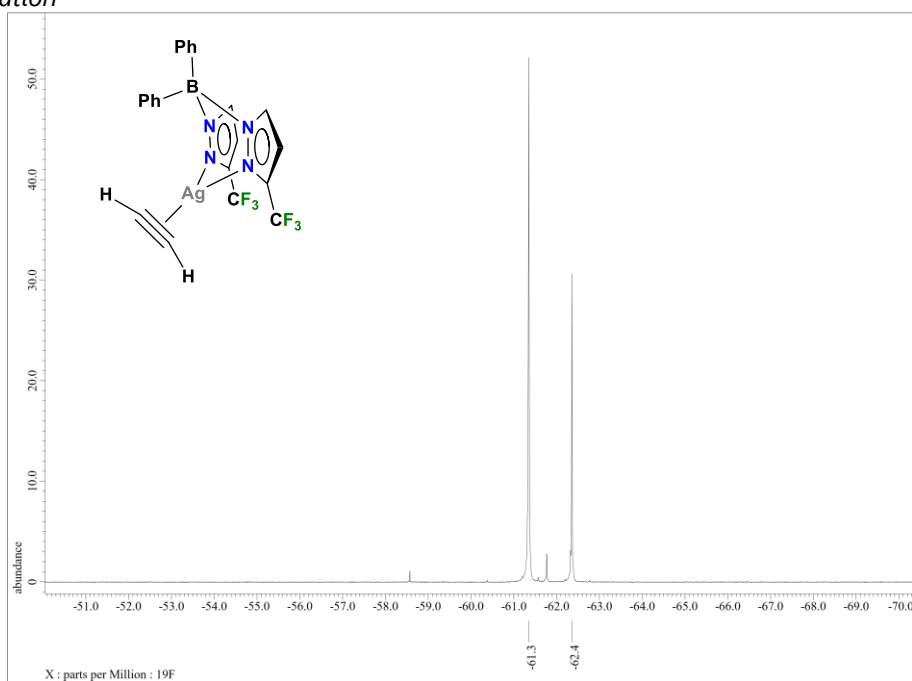

**Figure S7:**  $^{19}\text{F}$  NMR Spectrum of  $[\text{Ph}_2\text{B}(3\text{-(CF}_3\text{)Pz})_2]\text{Ag}(\text{C}_2\text{H}_2)$  (**10**) in  $\text{CDCl}_3$ . The peak at -62.4 ppm belongs to the acetylene dissociated product. The NMR data were collected in the presence of excess acetylene (some  $\text{C}_2\text{H}_2$  was added to the headspace of the NMR tube).

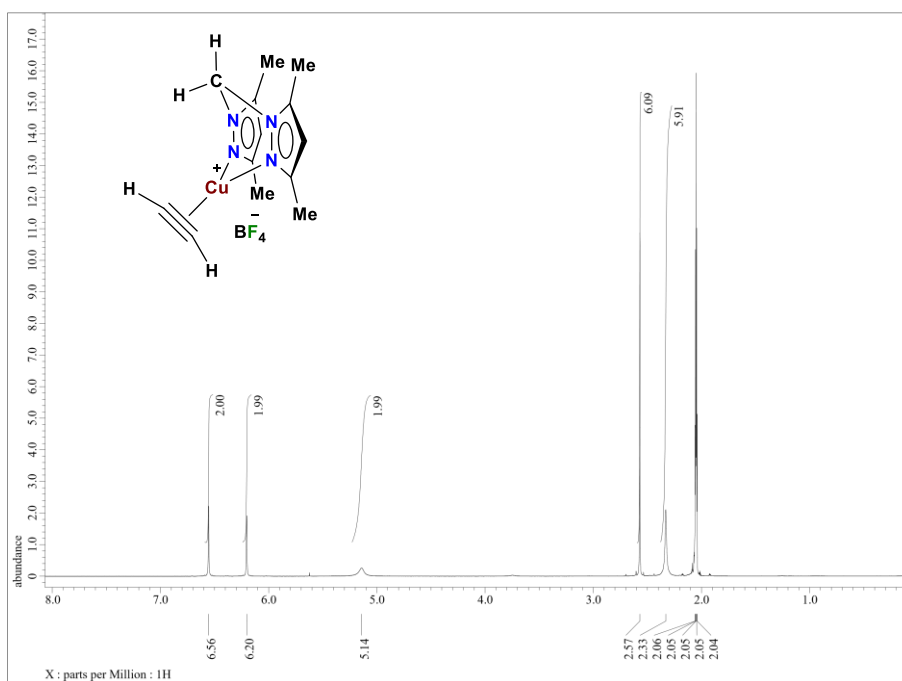

**Figure S8:**  $^1\text{H}$  NMR Spectrum of  $[\{\text{H}_2\text{C}(3,5\text{-(CH}_3\text{)}_2\text{Pz})_2\}\text{Cu}(\text{C}_2\text{H}_2)][\text{BF}_4]$  (**11**) in  $(\text{CD}_3)_2\text{CO}$ .

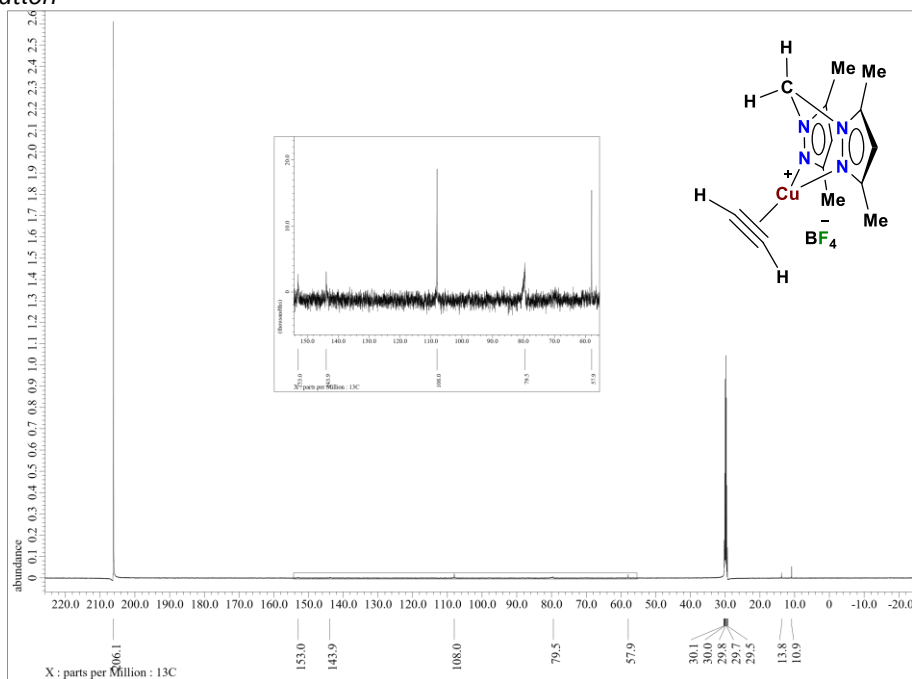

Figure S9:  $^{13}\text{C}$  NMR Spectrum of  $[\{\text{H}_2\text{C}(3,5\text{-}(\text{CH}_3)_2\text{Pz})_2\}\text{Cu}(\text{C}_2\text{H}_2)][\text{BF}_4]$  (**11**) in  $(\text{CD}_3)_2\text{CO}$ .

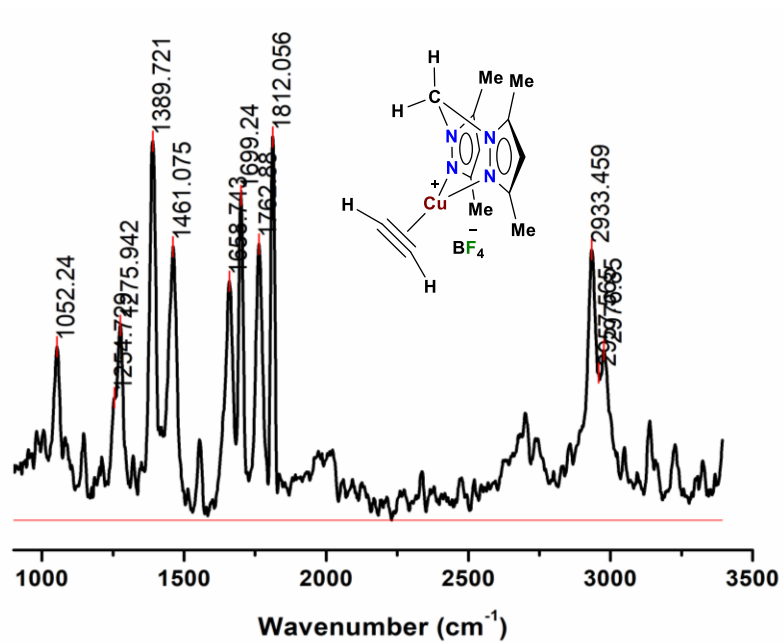

Figure S10: Raman Spectrum of  $[\{\text{H}_2\text{C}(3,5\text{-}(\text{CH}_3)_2\text{Pz})_2\}\text{Cu}(\text{C}_2\text{H}_2)][\text{BF}_4]$  (**11**).

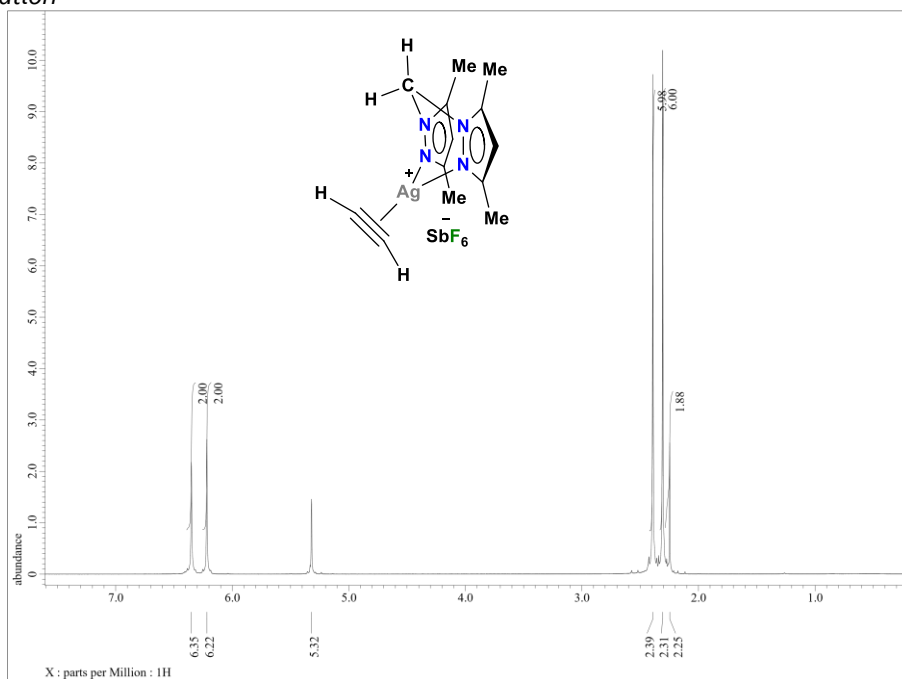

Figure S11:  $^1\text{H}$  NMR Spectrum of  $[\{\text{H}_2\text{C}(3,5\text{-}(\text{CH}_3)_2\text{Pz})_2\}\text{Ag}(\text{C}_2\text{H}_2)][\text{SbF}_6]$  (12) in  $\text{CD}_2\text{Cl}_2$ .

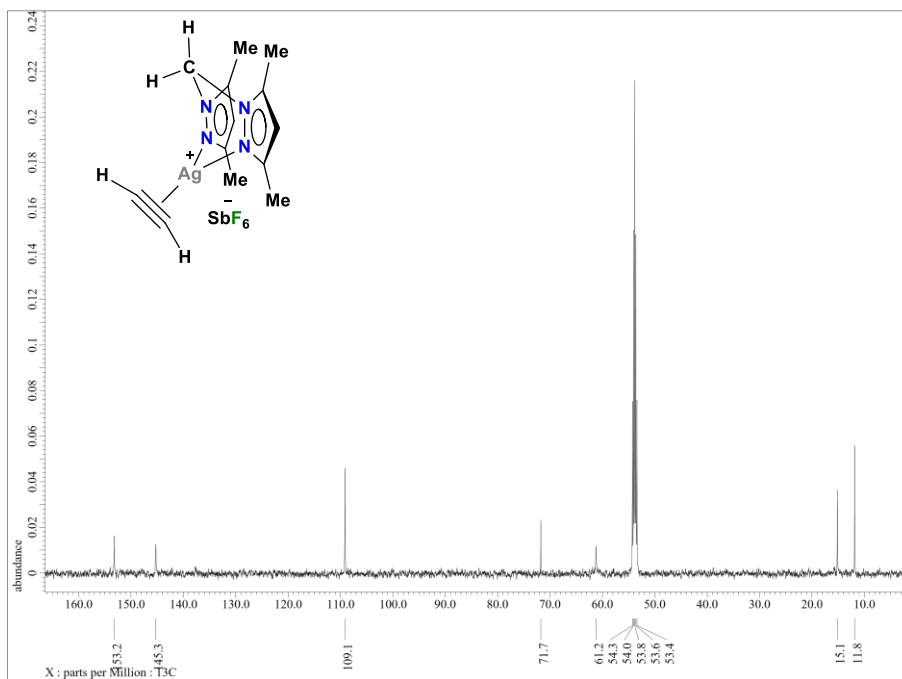

Figure S12:  $^{13}\text{C}$  NMR Spectrum of  $[\{\text{H}_2\text{C}(3,5\text{-}(\text{CH}_3)_2\text{Pz})_2\}\text{Ag}(\text{C}_2\text{H}_2)][\text{SbF}_6]$  (12) in  $\text{CD}_2\text{Cl}_2$ .

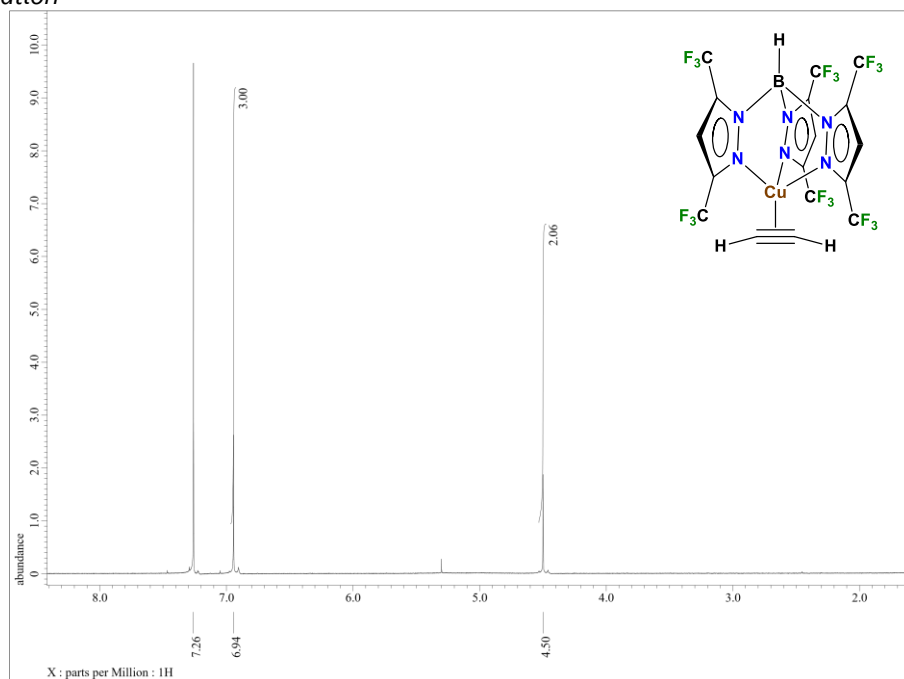

Figure S13:  $^1\text{H}$  NMR Spectrum of  $[\text{HB}(3,5\text{-(CF}_3)_2\text{Pz)}_3]\text{Cu}(\text{C}_2\text{H}_2)$  (**13**) in  $\text{CDCl}_3$ .

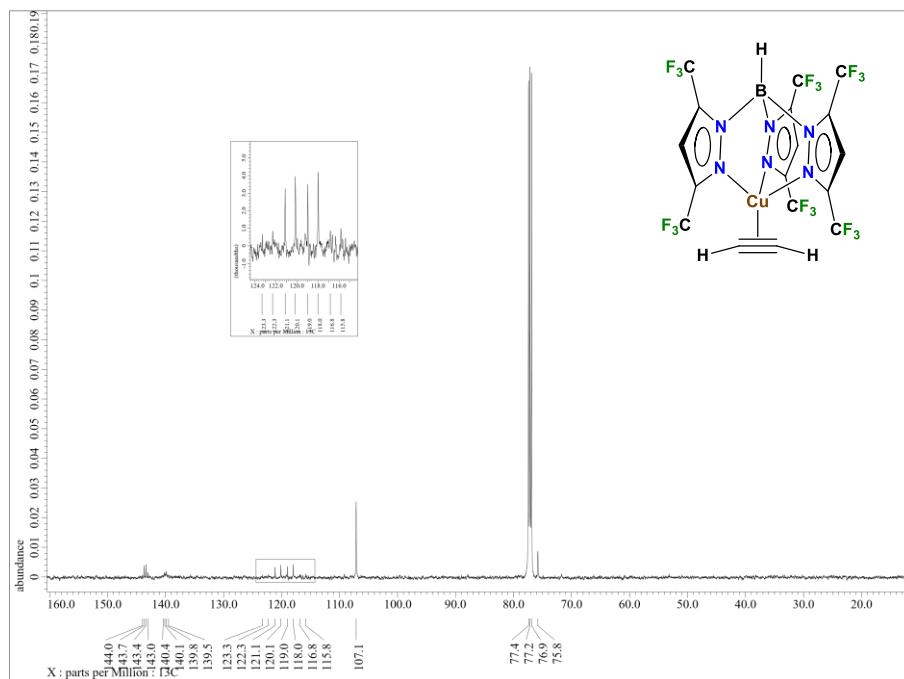

Figure S14:  $^{13}\text{C}$  NMR Spectrum of  $[\text{HB}(3,5\text{-(CF}_3)_2\text{Pz)}_3]\text{Cu}(\text{C}_2\text{H}_2)$  (**13**) in  $\text{CDCl}_3$ .

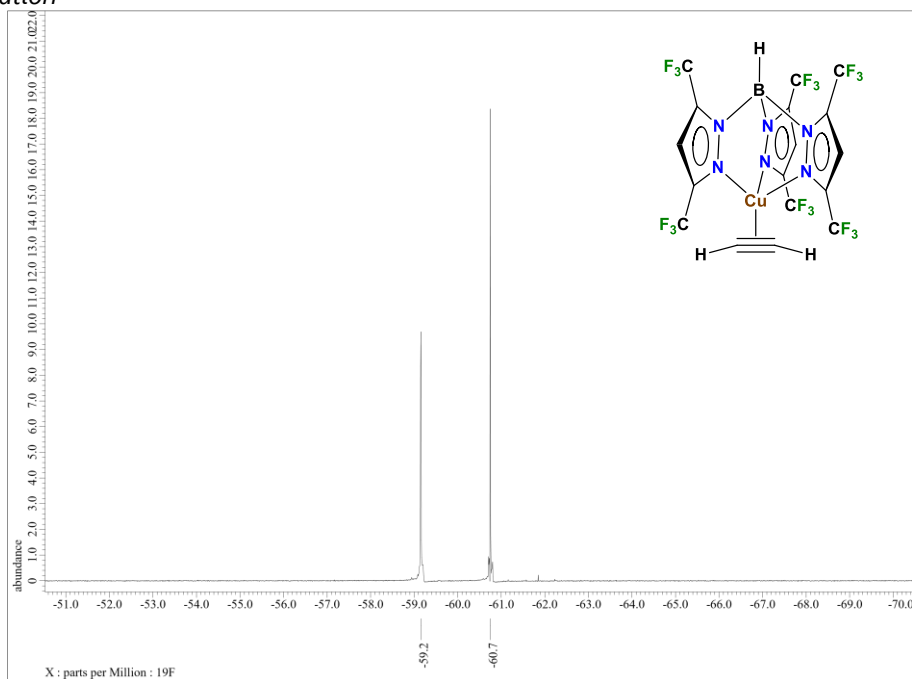

Figure S15:  $^{19}\text{F}$  NMR Spectrum of  $[\text{HB}(3,5\text{-(CF}_3)_2\text{Pz)}_3]\text{Cu}(\text{C}_2\text{H}_2)$  (13) in  $\text{CDCl}_3$ .

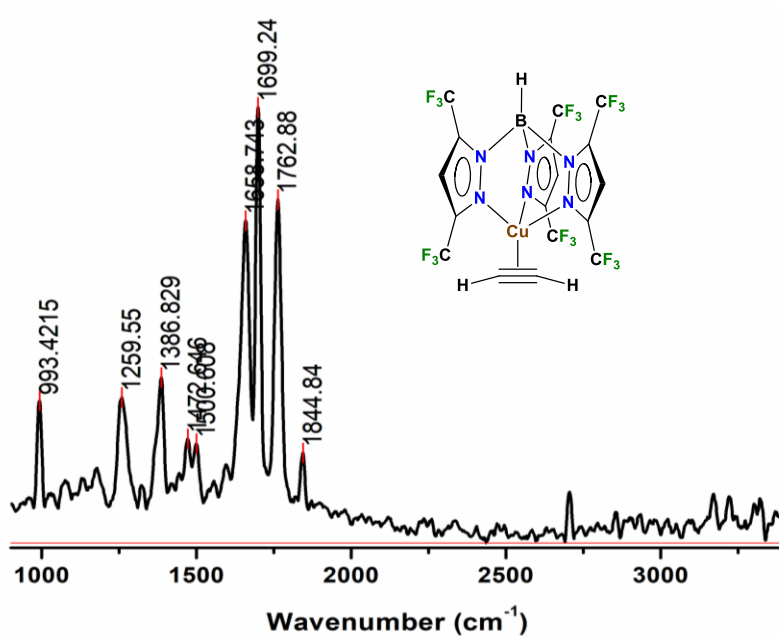

Figure S16: Raman Spectrum of  $[\text{HB}(3,5\text{-(CF}_3)_2\text{Pz)}_3]\text{Cu}(\text{C}_2\text{H}_2)$  (13).

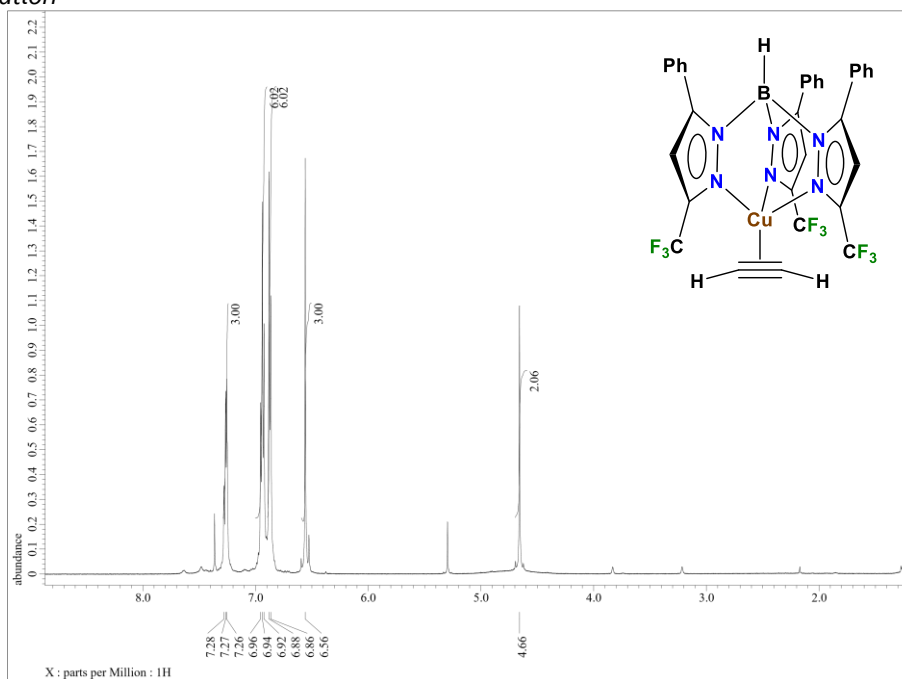

**Figure S17:**  $^1\text{H}$  NMR Spectrum of  $[\text{HB}(3\text{-(CF}_3\text{)},5\text{-(Ph)Pz})_3\text{Cu}(\text{C}_2\text{H}_2)$  (**14**) in  $\text{CDCl}_3$ .

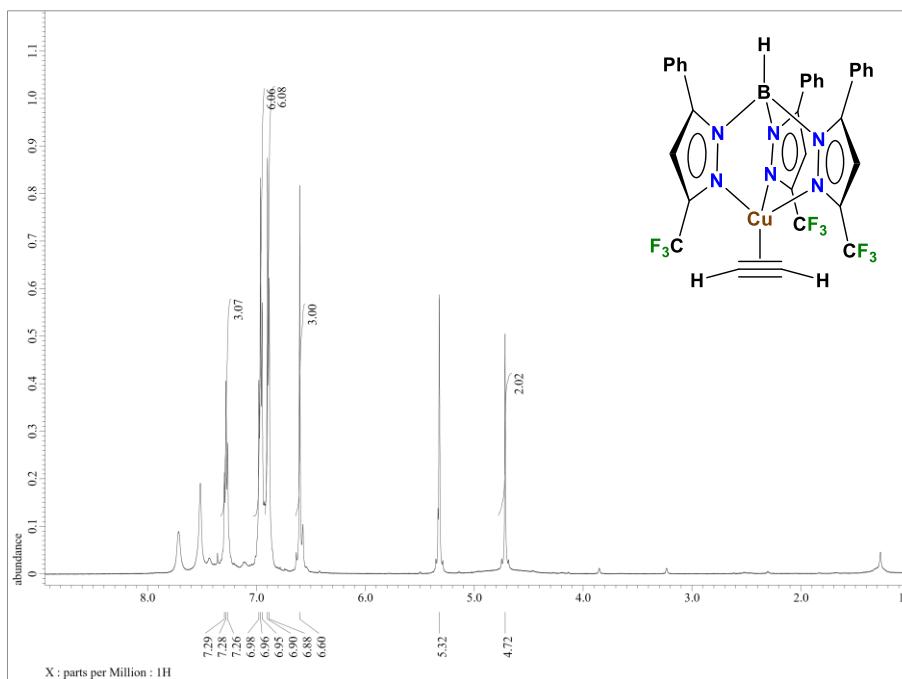

**Figure S18:**  $^1\text{H}$  NMR Spectrum of  $[\text{HB}(3\text{-(CF}_3\text{)},5\text{-(Ph)Pz})_3\text{Cu}(\text{C}_2\text{H}_2)$  (**14**) in  $\text{CD}_2\text{Cl}_2$ .



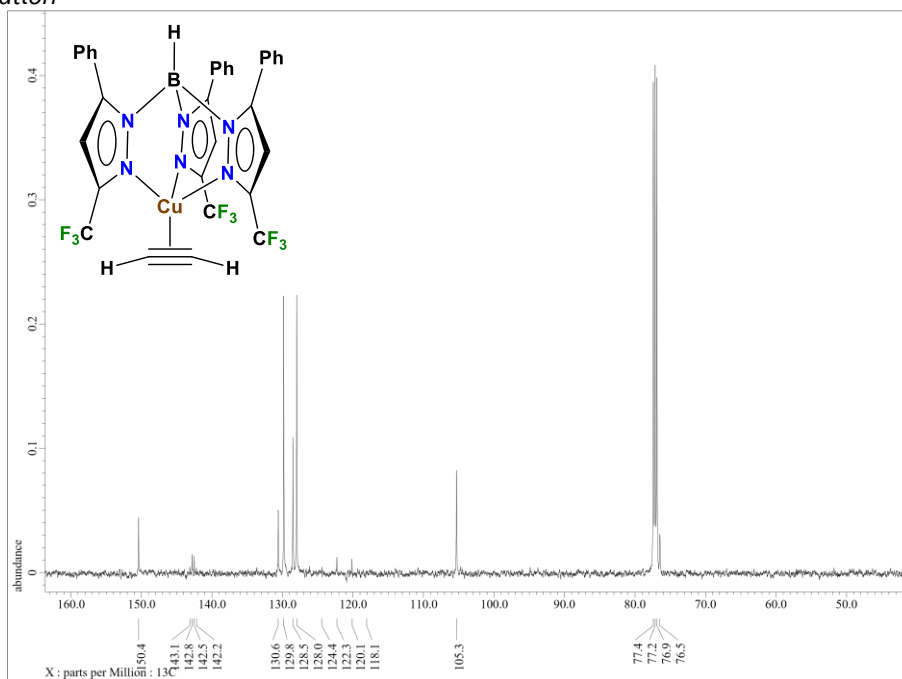

**Figure S19:**  $^{13}\text{C}$  NMR Spectrum of  $[\text{HB}(3\text{-(CF}_3\text{)},5\text{-(Ph)Pz})_3\text{Cu}(\text{C}_2\text{H}_2)$  (**14**) in  $\text{CDCl}_3$ .

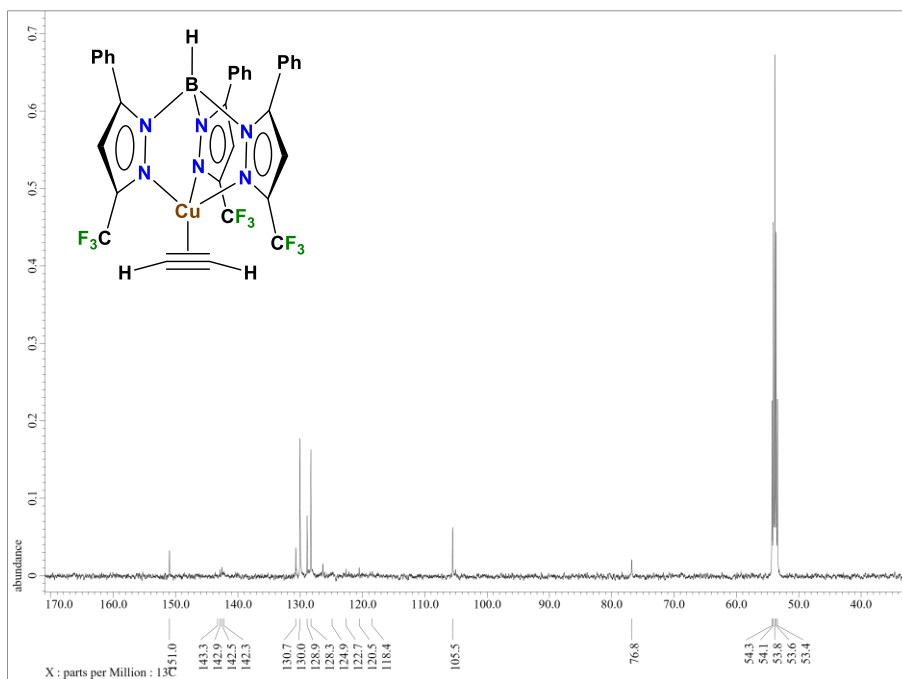

**Figure S20:**  $^{13}\text{C}$  NMR Spectrum of  $[\text{HB}(3\text{-(CF}_3\text{)},5\text{-(Ph)Pz})_3\text{Cu}(\text{C}_2\text{H}_2)$  (**14**) in  $\text{CD}_2\text{Cl}_2$ .

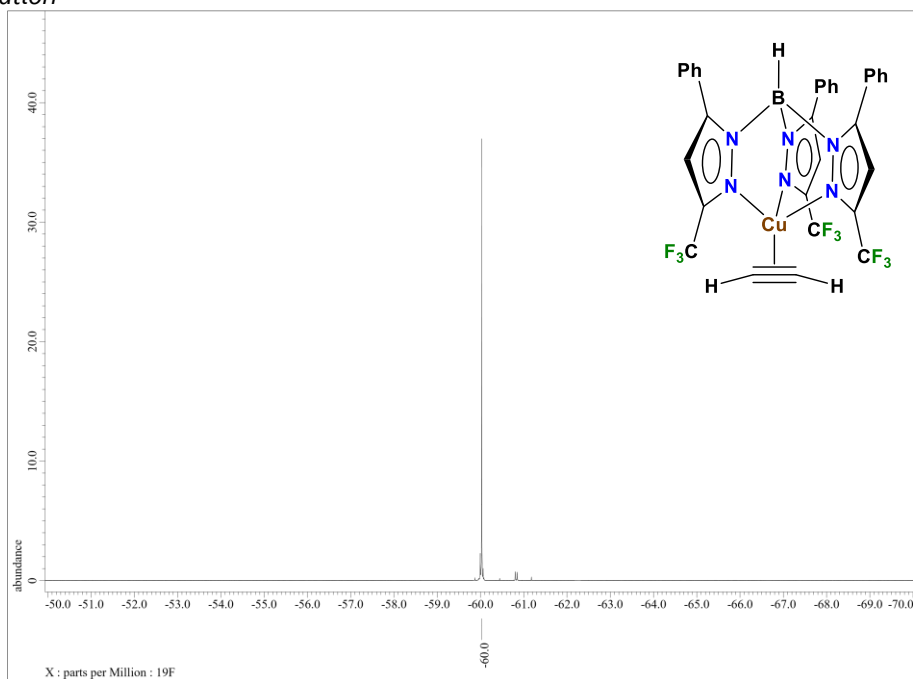

**Figure S21:**  $^{19}\text{F}$  NMR Spectrum of  $[\text{HB}(3\text{-(CF}_3\text{)},5\text{-(Ph)Pz})_3\text{Cu}(\text{C}_2\text{H}_2)]$  (**14**) in  $\text{CDCl}_3$

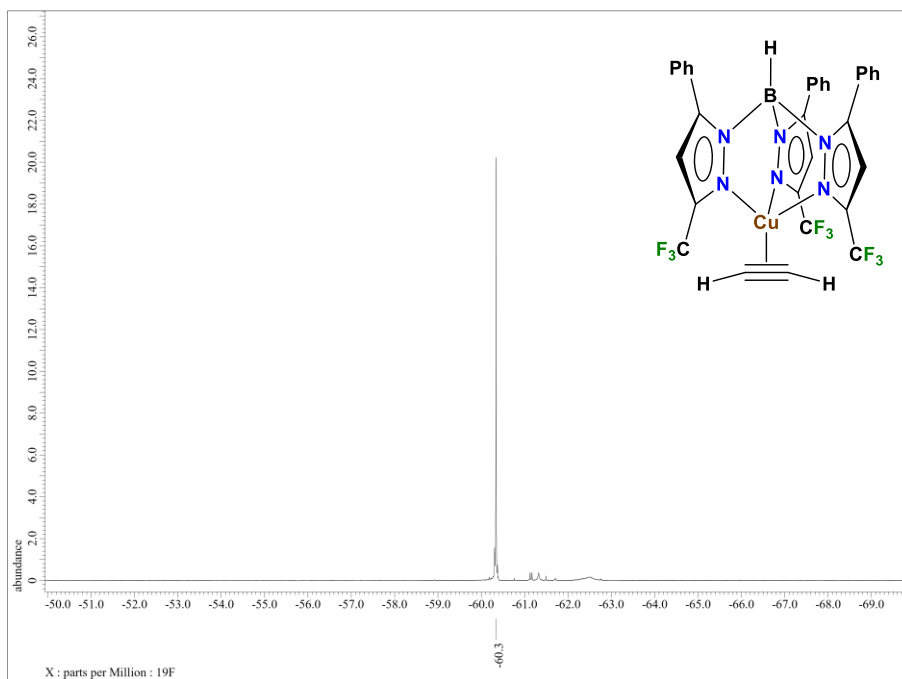

**Figure S22:**  $^{19}\text{F}$  NMR Spectrum of  $[\text{HB}(3\text{-(CF}_3\text{)},5\text{-(Ph)Pz})_3\text{Cu}(\text{C}_2\text{H}_2)]$  (**14**) in  $\text{CD}_2\text{Cl}_2$ .

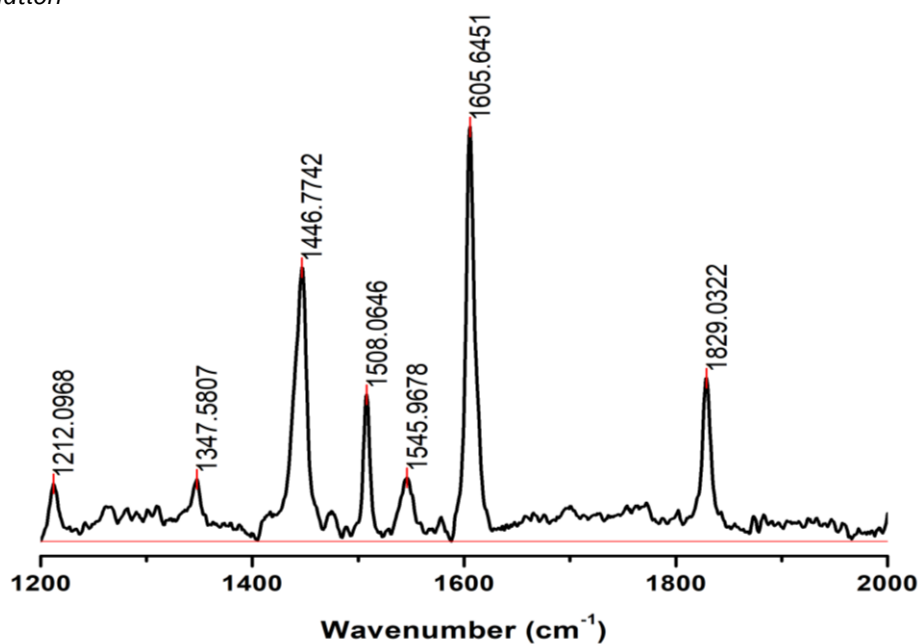

Figure S23: Raman Spectrum of [HB(3-(CF<sub>3</sub>),5-(Ph)Pz)<sub>3</sub>]Cu(C<sub>2</sub>H<sub>2</sub>) (**14**).

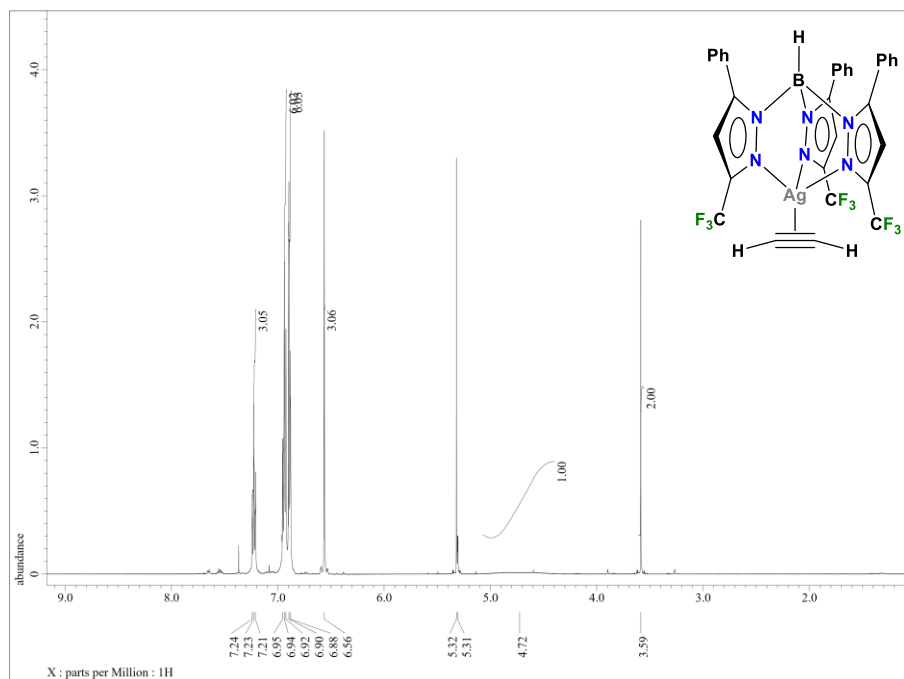

Figure S24: <sup>1</sup>H NMR Spectrum of [HB(3-(CF<sub>3</sub>),5-(Ph)Pz)<sub>3</sub>]Ag(C<sub>2</sub>H<sub>2</sub>) (**15**) in CD<sub>2</sub>Cl<sub>2</sub>.

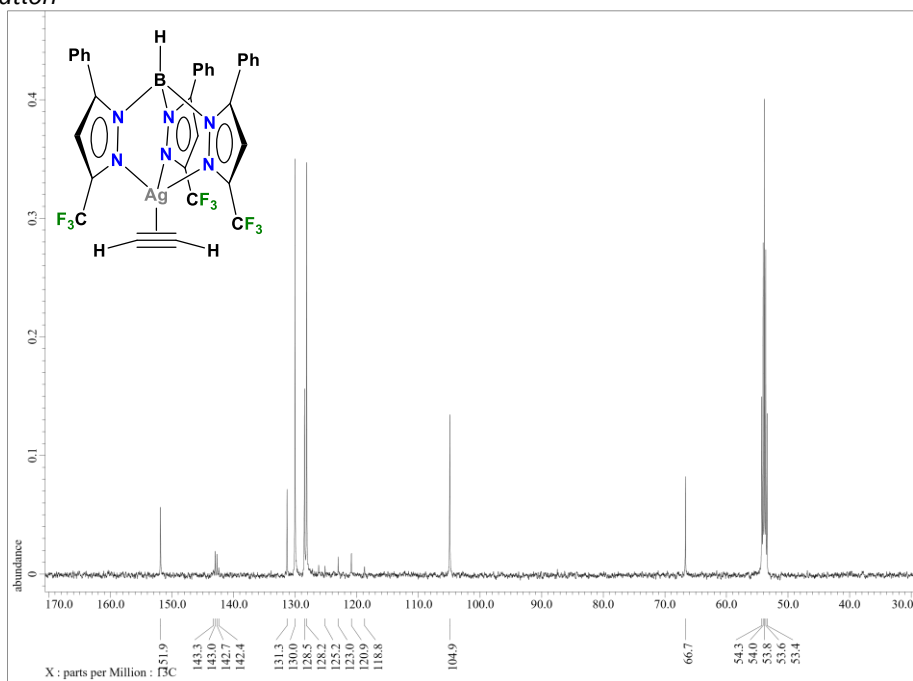

Figure S25:  $^{13}\text{C}$  NMR Spectrum of  $[\text{HB}(3\text{-(CF}_3\text{)},5\text{-(Ph)Pz})_3\text{Ag}(\text{C}_2\text{H}_2)]$  (**15**) in  $\text{CD}_2\text{Cl}_2$ .

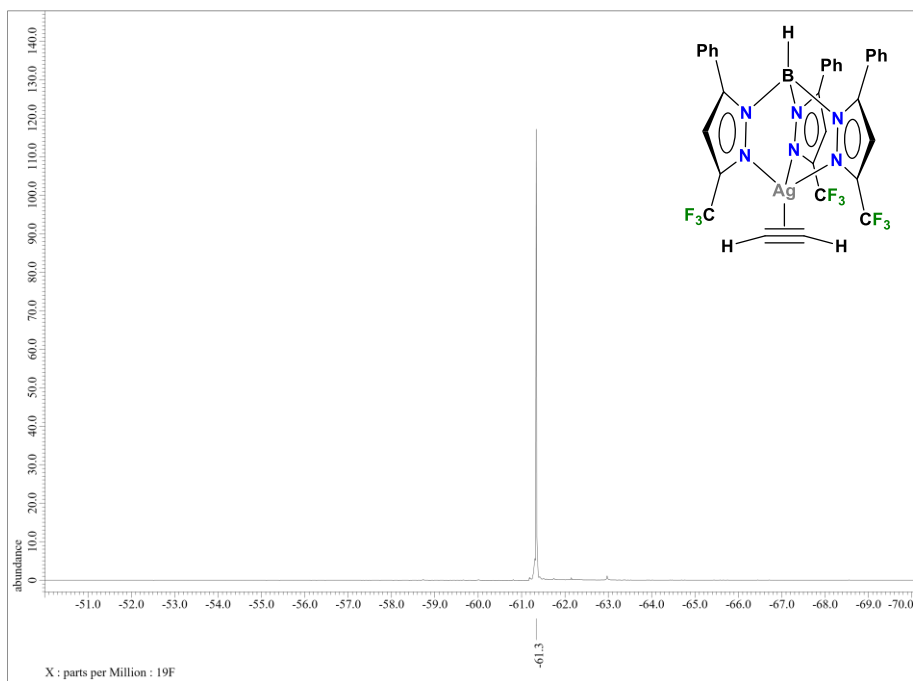

Figure S26:  $^{19}\text{F}$  NMR Spectrum of  $[\text{HB}(3\text{-(CF}_3\text{)},5\text{-(Ph)Pz})_3\text{Ag}(\text{C}_2\text{H}_2)]$  (**15**) in  $\text{CD}_2\text{Cl}_2$ .

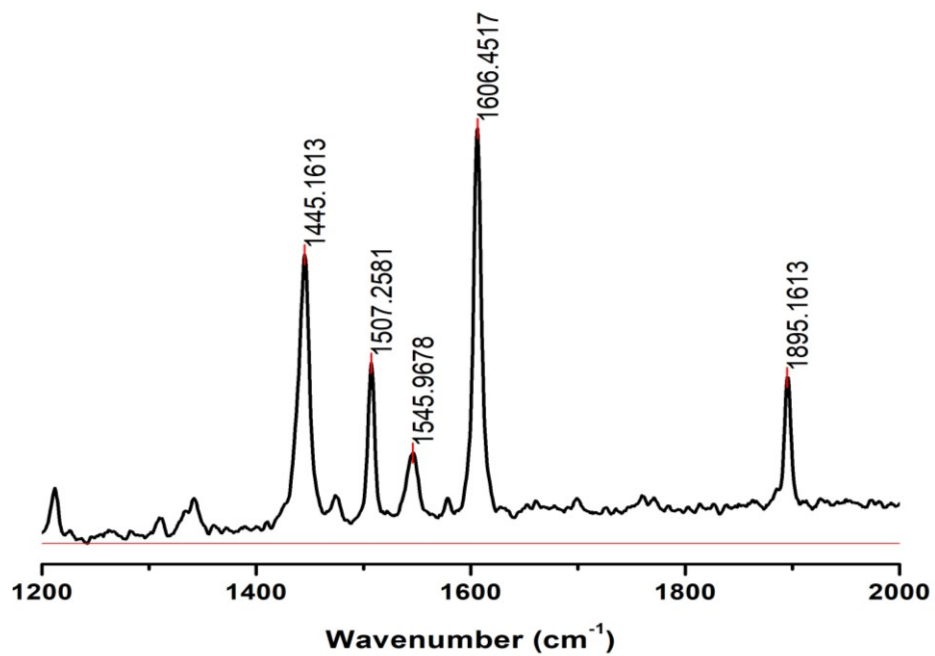

Figure S27: Raman Spectrum of [HB(3-(CF<sub>3</sub>),5-(Ph)Pz)<sub>3</sub>]Ag(C<sub>2</sub>H<sub>2</sub>) (15).

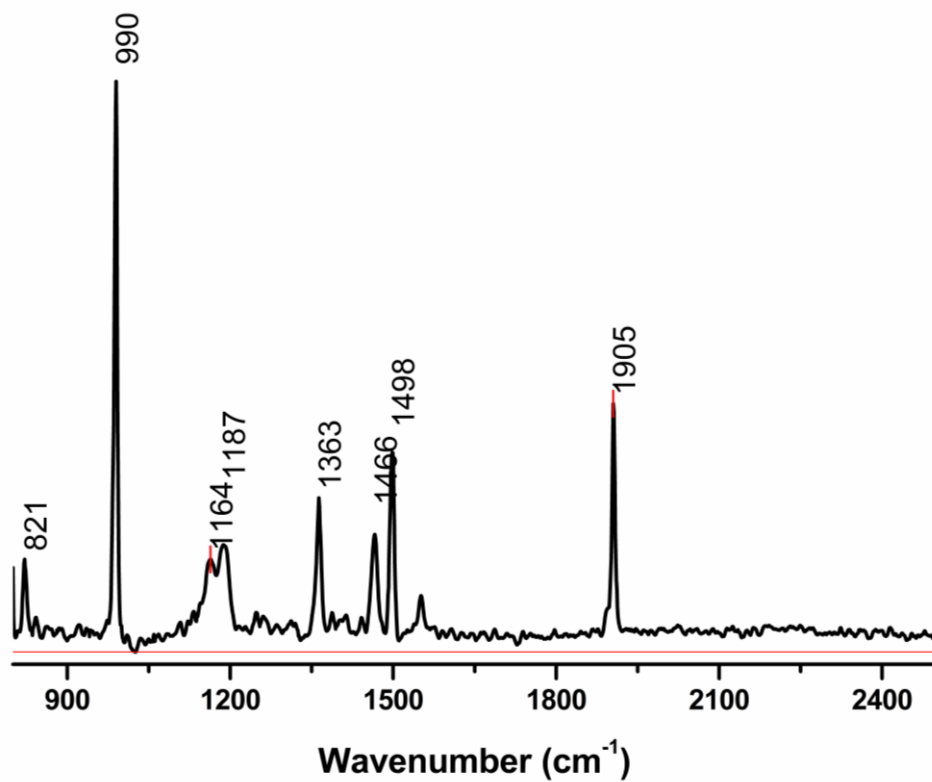

Figure S28: Raman Spectrum of [HB(3,5-(CF<sub>3</sub>)<sub>2</sub>Pz)<sub>3</sub>]Ag(C<sub>2</sub>H<sub>2</sub>) (5). This complex was synthesized as previously reported.<sup>5</sup>

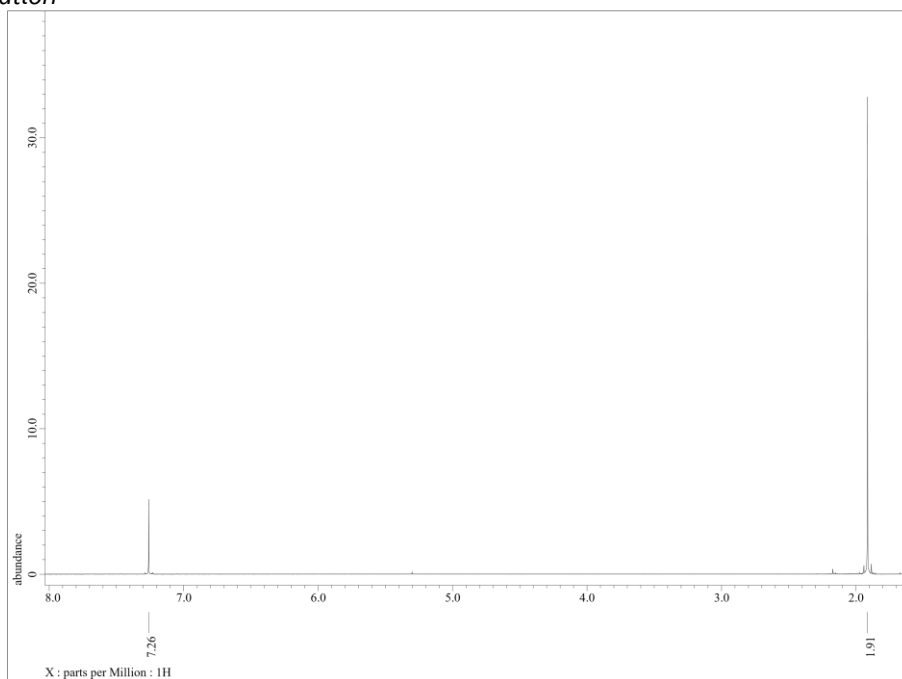

**Figure S29:** <sup>1</sup>H NMR Spectrum of free acetylene in CDCl<sub>3</sub>.

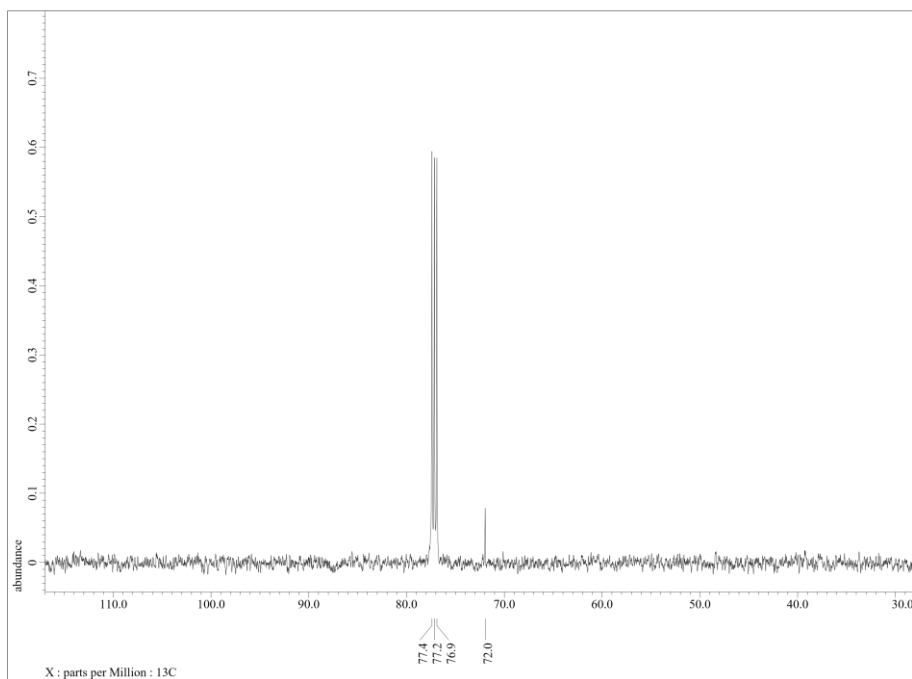

**Figure S30:** <sup>13</sup>C NMR Spectrum of free acetylene in CDCl<sub>3</sub>.

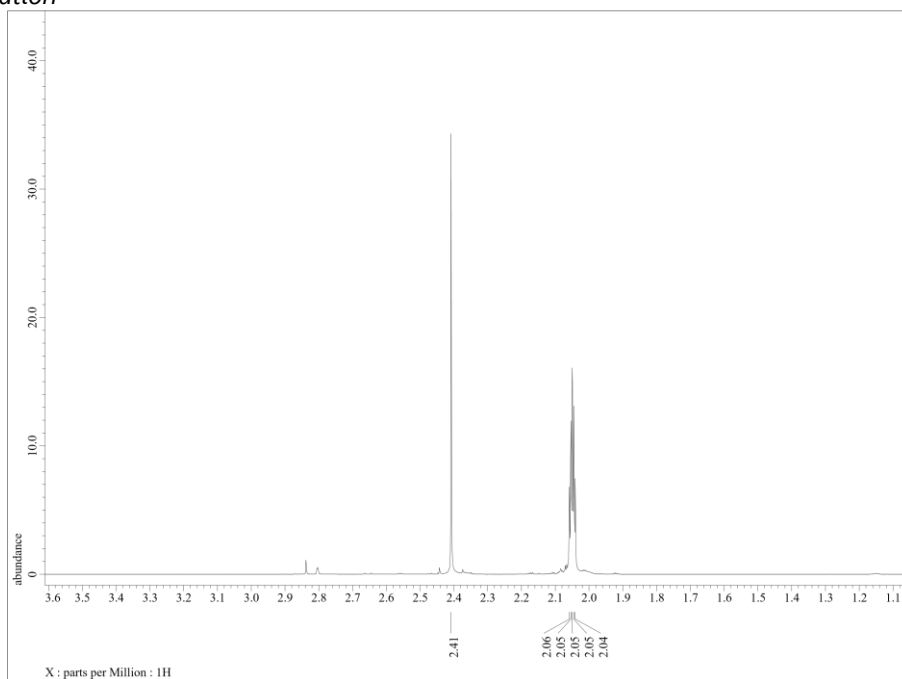

**Figure S31:**  $^1\text{H}$  NMR Spectrum of free acetylene in  $(\text{CD}_3)_2\text{CO}$ .

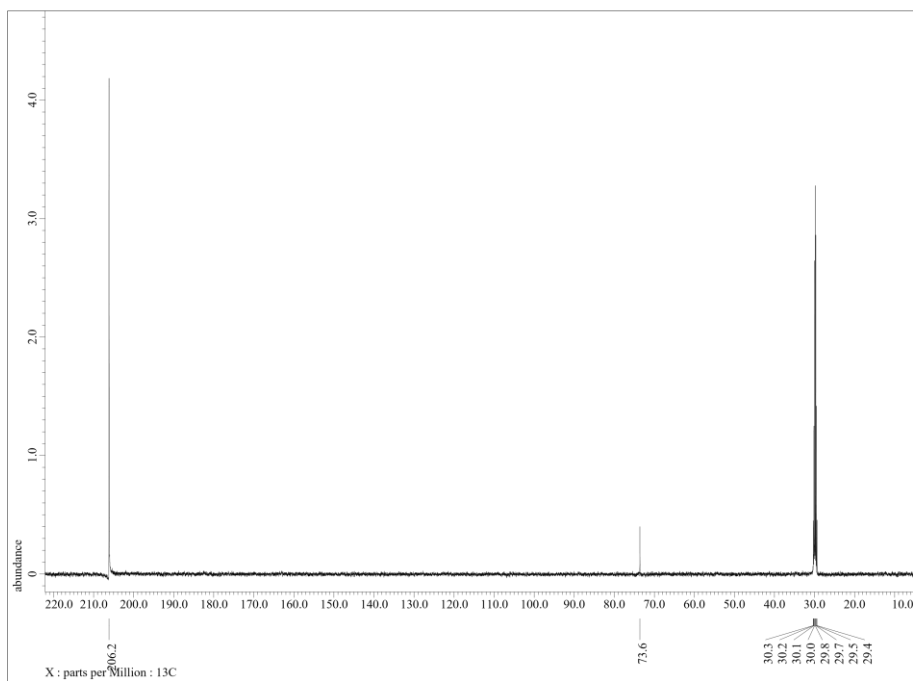

**Figure S32:**  $^{13}\text{C}$  NMR Spectrum of free acetylene in  $(\text{CD}_3)_2\text{CO}$ .

## Compound stability tests

**Solids:** About 5 mg of each complex was placed in a vial and kept either open to air or under N<sub>2</sub> atmosphere or acetylene gas at room temperature for 16 h. The stability of solids under reduced pressure was tested by placing samples under vacuum (~5 torr) for 1 h at room temperature. After the specified time, samples were dissolved in CDCl<sub>3</sub> and analyzed by <sup>1</sup>H NMR. These spectra were compared to the spectra obtained for each sample at 0 h in the same solvent. Note that solid samples can be handled in air for short periods to prepare NMR samples without any signs of decomposition.

**Solutions:** About 5 mg of each complex was dissolved in CDCl<sub>3</sub> (~0.6 mL) and <sup>1</sup>H NMR data were collected immediately afterward. None of the samples (except **10**, which shows some C<sub>2</sub>H<sub>2</sub> dissociation) show signs of decomposition or acetylene loss until the first data collection point (about 15 mins to collect <sup>1</sup>H NMR data). These NMR tubes were stored either open to air or under N<sub>2</sub> at room temperature for 16 h and tested again using <sup>1</sup>H NMR spectrum to record the observations. Some copper samples turned to blue/green while certain silver adducts showed darkening (black deposits) as indicated below as color change but their NMR data did not indicate signs of significant ligand decomposition.

**Table S1.** Stability of copper and silver acetylene complexes under different conditions at ambient temperature.

| Metal complex                                                                                                                                  | Solid                               |                                 |                     |                  | Solution (CDCl <sub>3</sub> ) |                                 |                     |
|------------------------------------------------------------------------------------------------------------------------------------------------|-------------------------------------|---------------------------------|---------------------|------------------|-------------------------------|---------------------------------|---------------------|
|                                                                                                                                                | Under C <sub>2</sub> H <sub>2</sub> | Under N <sub>2</sub> after 16 h | Open air after 16 h | Vacuum after 1 h | After 15 min                  | Under N <sub>2</sub> after 16 h | Open air after 16 h |
| [HB(3,5-(CF <sub>3</sub> ) <sub>2</sub> Pz) <sub>3</sub> ]Cu(C <sub>2</sub> H <sub>2</sub> ) ( <b>13</b> )                                     | ●                                   | ●                               | ●                   | ●                | ●                             | ●                               | ●                   |
| [HB(3,5-(CF <sub>3</sub> ) <sub>2</sub> Pz) <sub>3</sub> ]Ag(C <sub>2</sub> H <sub>2</sub> ) ( <b>5</b> )                                      | ●                                   | ●                               | ●                   | ●                | ●                             | ●                               | ●                   |
| [HB(3-(CF <sub>3</sub> ),5-(Ph)Pz) <sub>3</sub> ]Cu(C <sub>2</sub> H <sub>2</sub> ) ( <b>14</b> )                                              | ●                                   | ●                               | ●                   | ●                | ●                             | ●                               | ●                   |
| [HB(3-(CF <sub>3</sub> ),5-(Ph)Pz) <sub>3</sub> ]Ag(C <sub>2</sub> H <sub>2</sub> ) ( <b>15</b> )                                              | ●                                   | ●                               | ●                   | ●                | ●                             | ●                               | ●                   |
| [Ph <sub>2</sub> B(3-(CF <sub>3</sub> )Pz) <sub>2</sub> ]Cu(C <sub>2</sub> H <sub>2</sub> ) ( <b>9</b> )                                       | ●                                   | ●                               | ●                   | ●                | ●                             | ●                               | ●                   |
| [Ph <sub>2</sub> B(3-(CF <sub>3</sub> )Pz) <sub>2</sub> ]Ag(C <sub>2</sub> H <sub>2</sub> ) ( <b>10</b> )                                      | ●                                   | ●                               | ●                   | ●                | ●                             | ●                               | ●                   |
| [{H <sub>2</sub> C(3,5-(CH <sub>3</sub> ) <sub>2</sub> Pz) <sub>2</sub> }Cu(C <sub>2</sub> H <sub>2</sub> )] [BF <sub>4</sub> ] ( <b>11</b> )  | ●                                   | ●                               | ●                   | ●                | ●                             | ●                               | ●                   |
| [{H <sub>2</sub> C(3,5-(CH <sub>3</sub> ) <sub>2</sub> Pz) <sub>2</sub> }Ag(C <sub>2</sub> H <sub>2</sub> )] [SbF <sub>6</sub> ] ( <b>12</b> ) | ●                                   | ●                               | ●                   | ●                | ●                             | ●                               | ●                   |

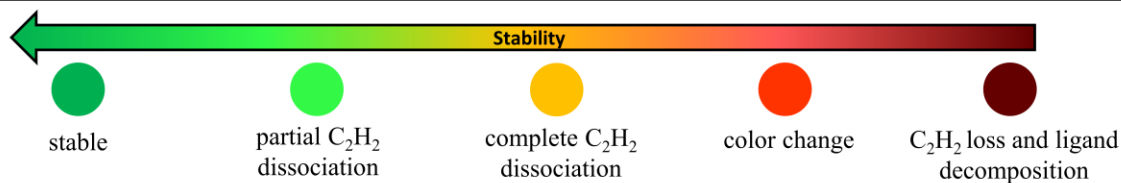



**X-ray Data Collection and Structure Determinations**

A suitable crystal covered with a layer of hydrocarbon/Paratone-N oil was selected and mounted on a Cryo-loop, and immediately placed in the low temperature nitrogen stream. The X-ray intensity data were measured at 100(2) K on a Bruker D8 Quest with a Photon 100 ([Ph<sub>2</sub>B(3-(CF<sub>3</sub>)Pz)<sub>2</sub>]Ag(C<sub>2</sub>H<sub>2</sub>), [H<sub>2</sub>C(3,5-(Me)<sub>2</sub>Pz)<sub>2</sub>]Cu(C<sub>2</sub>H<sub>2</sub>)] [BF<sub>4</sub>], [H<sub>2</sub>C(3,5-(Me)<sub>2</sub>Pz)<sub>2</sub>]Ag(C<sub>2</sub>H<sub>2</sub>)] [SbF<sub>6</sub>]) or Photon II ([Ph<sub>2</sub>B(3-(CF<sub>3</sub>)Pz)<sub>2</sub>]Cu(C<sub>2</sub>H<sub>2</sub>), [HB(3,5-(CF<sub>3</sub>)<sub>2</sub>Pz)<sub>3</sub>]Cu(C<sub>2</sub>H<sub>2</sub>)) detector equipped with an Oxford Cryosystems 700 series cooler, a Triumph monochromator, and a Mo K $\alpha$  fine-focus sealed tube ( $\lambda = 0.71073$  Å). Intensity data were processed using the Bruker Apex3 or Apex4 program suite. Absorption corrections were applied by using SADABS. Initial atomic positions were located by direct methods using XT, and the structures of the compounds were refined by the least-squares method using SHELXL<sup>6,7</sup> within Olex2<sup>8</sup> GUI. The [HB(3,5-(CF<sub>3</sub>)<sub>2</sub>Pz)<sub>3</sub>]Cu(C<sub>2</sub>H<sub>2</sub>) crystallized with two molecules of toluene and sits on a crystallographic mirror plane containing B, Cu, a pyrazolyl ring, and centroid of the acetylene ligand. All the non-hydrogen atoms were refined anisotropically. Hydrogen atoms were included at calculated positions and refined riding on corresponding carbons, except hydrogen atoms on acetylene carbons of [Ph<sub>2</sub>B(3-(CF<sub>3</sub>)Pz)<sub>2</sub>]Cu(C<sub>2</sub>H<sub>2</sub>), [Ph<sub>2</sub>B(3-(CF<sub>3</sub>)Pz)<sub>2</sub>]Ag(C<sub>2</sub>H<sub>2</sub>), and [H<sub>2</sub>C(3,5-(Me)<sub>2</sub>Pz)<sub>2</sub>]Cu(C<sub>2</sub>H<sub>2</sub>)] [BF<sub>4</sub>], which were located from difference map and refined freely. X-ray structural figures were generated using Olex2. CCDC **2152321-2152325** files contain the supplementary crystallographic data. These data can be obtained free of charge via <http://www.ccdc.cam.ac.uk/conts/retrieving.html> or from the Cambridge Crystallographic Data Centre (CCDC), 12 Union Road, Cambridge, CB2 1EZ, UK). Further details are given in the CIF.

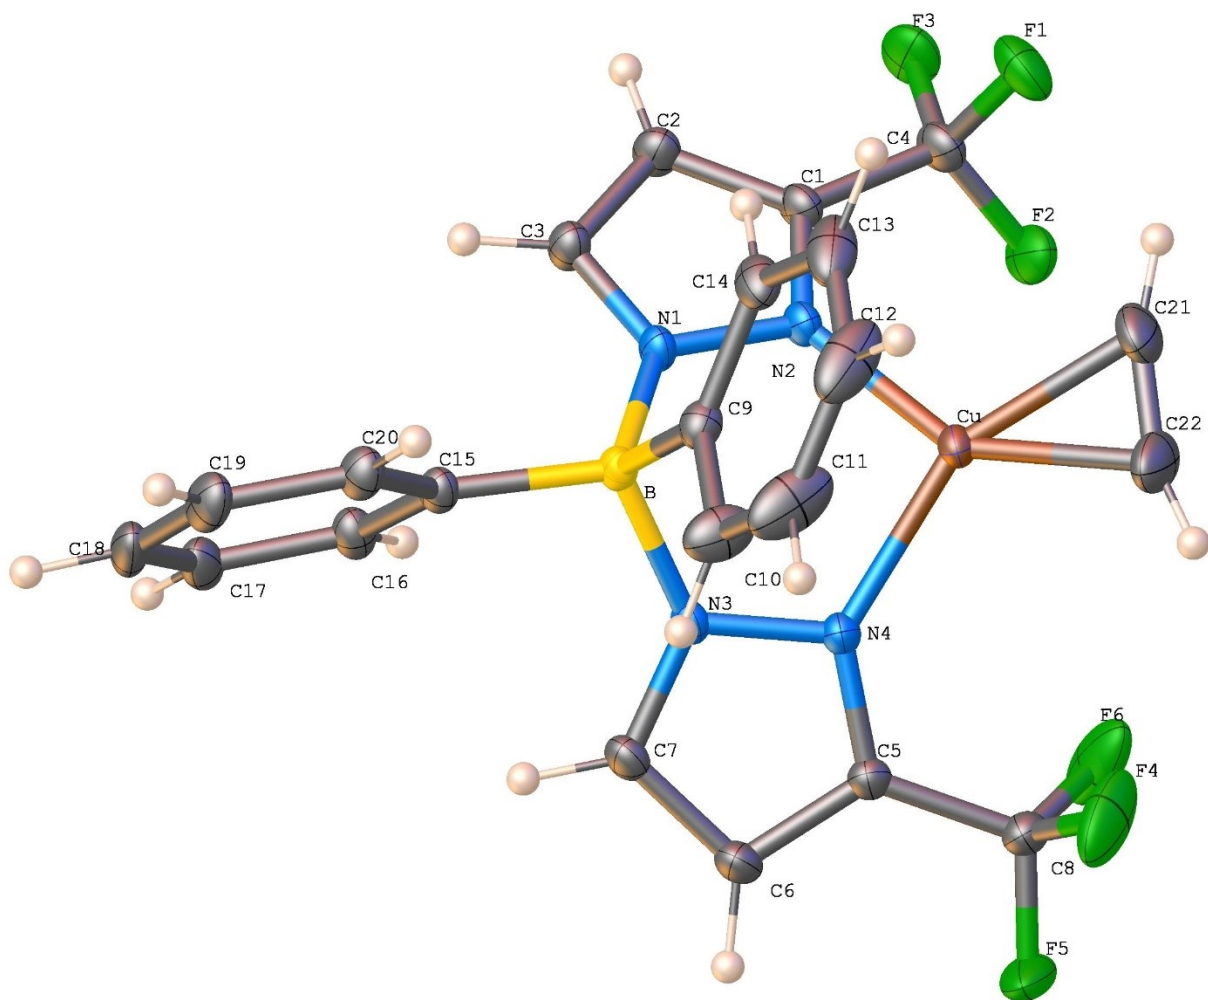

**Figure S33:** X-ray crystal structure and atom labelling of  $[\text{Ph}_2\text{B}(3\text{-(CF}_3\text{)Pz})_2]\text{Cu}(\text{C}_2\text{H}_2)$  (**9**).

**Table S2:** Crystal data and structure refinement for  $[\text{Ph}_2\text{B}(3\text{-(CF}_3\text{)Pz})_2]\text{Cu}(\text{C}_2\text{H}_2)$  (**9**).

|                     |                                                     |
|---------------------|-----------------------------------------------------|
| Identification code | hrd16                                               |
| Empirical formula   | $\text{C}_{22}\text{H}_{16}\text{BCuF}_6\text{N}_4$ |
| Formula weight      | 524.74                                              |
| Temperature/K       | 100.0                                               |
| Crystal system      | triclinic                                           |
| Space group         | P-1                                                 |
| a/Å                 | 10.1272(2)                                          |
| b/Å                 | 10.3873(2)                                          |
| c/Å                 | 12.0427(3)                                          |

## Supporting Information

|                                               |                                                               |
|-----------------------------------------------|---------------------------------------------------------------|
| $\alpha/^\circ$                               | 75.5420(10)                                                   |
| $\beta/^\circ$                                | 65.6390(10)                                                   |
| $\gamma/^\circ$                               | 76.9360(10)                                                   |
| Volume/ $\text{\AA}^3$                        | 1106.56(4)                                                    |
| Z                                             | 2                                                             |
| $\rho_{\text{calc}}/\text{cm}^3$              | 1.575                                                         |
| $\mu/\text{mm}^{-1}$                          | 1.055                                                         |
| F(000)                                        | 528.0                                                         |
| Crystal size/ $\text{mm}^3$                   | $0.33 \times 0.3 \times 0.19$                                 |
| Radiation                                     | MoK $\alpha$ ( $\lambda = 0.71073$ )                          |
| $2\theta$ range for data collection/ $^\circ$ | 5.256 to 66.282                                               |
| Index ranges                                  | $-15 \leq h \leq 15, -15 \leq k \leq 15, -18 \leq l \leq 17$  |
| Reflections collected                         | 21089                                                         |
| Independent reflections                       | 8239 [ $R_{\text{int}} = 0.0152, R_{\text{sigma}} = 0.0175$ ] |
| Data/restraints/parameters                    | 8239/0/316                                                    |
| Goodness-of-fit on $F^2$                      | 1.077                                                         |
| Final R indexes [ $I \geq 2\sigma(I)$ ]       | $R_1 = 0.0331, wR_2 = 0.0824$                                 |
| Final R indexes [all data]                    | $R_1 = 0.0373, wR_2 = 0.0857$                                 |
| Largest diff. peak/hole / $e \text{\AA}^{-3}$ | 1.21/-0.86                                                    |

**Table S3:** Bond Lengths for  $[\text{Ph}_2\text{B}(3\text{-(CF}_3\text{)Pz})_2]\text{Cu}(\text{C}_2\text{H}_2)$  (**9**).

| Atom | Atom | Length/ $\text{\AA}$ | Atom | Atom | Length/ $\text{\AA}$ |
|------|------|----------------------|------|------|----------------------|
| Cu   | N2   | 1.9714(10)           | C2   | C3   | 1.3879(17)           |
| Cu   | N4   | 1.9697(10)           | C5   | C6   | 1.3899(17)           |
| Cu   | C21  | 1.9629(14)           | C5   | C8   | 1.4874(17)           |
| Cu   | C22  | 1.9567(15)           | C6   | C7   | 1.3833(18)           |
| F1   | C4   | 1.3460(17)           | C9   | C10  | 1.4032(19)           |
| F2   | C4   | 1.3373(16)           | C9   | C14  | 1.3993(18)           |
| F3   | C4   | 1.3374(16)           | C9   | B    | 1.6153(18)           |
| F4   | C8   | 1.3332(17)           | C10  | C11  | 1.389(2)             |
| F5   | C8   | 1.3154(15)           | C11  | C12  | 1.386(3)             |
| F6   | C8   | 1.3106(17)           | C12  | C13  | 1.380(3)             |

**Table S3:** Bond Lengths for [Ph<sub>2</sub>B(3-(CF<sub>3</sub>)Pz)<sub>2</sub>]Cu(C<sub>2</sub>H<sub>2</sub>) (**9**).

| Atom | Atom | Length/Å   | Atom | Atom | Length/Å   |
|------|------|------------|------|------|------------|
| N1   | N2   | 1.3602(13) | C13  | C14  | 1.399(2)   |
| N1   | C3   | 1.3431(15) | C15  | C16  | 1.4053(17) |
| N1   | B    | 1.5767(16) | C15  | C20  | 1.3998(17) |
| N2   | C1   | 1.3404(15) | C15  | B    | 1.6168(17) |
| N3   | N4   | 1.3602(13) | C16  | C17  | 1.3931(18) |
| N3   | C7   | 1.3467(15) | C17  | C18  | 1.389(2)   |
| N3   | B    | 1.5900(16) | C18  | C19  | 1.383(2)   |
| N4   | C5   | 1.3415(15) | C19  | C20  | 1.3970(18) |
| C1   | C2   | 1.3885(17) | C21  | C22  | 1.217(3)   |
| C1   | C4   | 1.4877(17) |      |      |            |

**Table S4:** Bond Angles for [Ph<sub>2</sub>B(3-(CF<sub>3</sub>)Pz)<sub>2</sub>]Cu(C<sub>2</sub>H<sub>2</sub>) (**9**).

| Atom | Atom | Atom | Angle/°    | Atom | Atom | Atom | Angle/°    |
|------|------|------|------------|------|------|------|------------|
| N4   | Cu   | N2   | 95.51(4)   | C7   | C6   | C5   | 103.91(11) |
| C21  | Cu   | N2   | 113.32(6)  | N3   | C7   | C6   | 109.11(11) |
| C21  | Cu   | N4   | 151.14(6)  | F4   | C8   | C5   | 112.37(12) |
| C22  | Cu   | N2   | 149.48(6)  | F5   | C8   | F4   | 105.32(13) |
| C22  | Cu   | N4   | 115.01(6)  | F5   | C8   | C5   | 111.48(11) |
| C22  | Cu   | C21  | 36.17(8)   | F6   | C8   | F4   | 105.34(14) |
| N2   | N1   | B    | 120.21(9)  | F6   | C8   | F5   | 108.66(14) |
| C3   | N1   | N2   | 109.77(9)  | F6   | C8   | C5   | 113.18(11) |
| C3   | N1   | B    | 129.51(10) | C10  | C9   | B    | 119.42(11) |
| N1   | N2   | Cu   | 117.47(7)  | C14  | C9   | C10  | 116.92(12) |
| C1   | N2   | Cu   | 136.29(8)  | C14  | C9   | B    | 123.66(11) |
| C1   | N2   | N1   | 105.93(10) | C11  | C10  | C9   | 121.89(16) |
| N4   | N3   | B    | 119.69(9)  | C12  | C11  | C10  | 119.87(17) |
| C7   | N3   | N4   | 109.55(10) | C13  | C12  | C11  | 119.80(15) |
| C7   | N3   | B    | 130.03(10) | C12  | C13  | C14  | 120.11(16) |
| N3   | N4   | Cu   | 117.00(7)  | C13  | C14  | C9   | 121.39(15) |

**Table S4:** Bond Angles for [Ph<sub>2</sub>B(3-(CF<sub>3</sub>)Pz)<sub>2</sub>]Cu(C<sub>2</sub>H<sub>2</sub>) (**9**).

| Atom | Atom | Atom | Angle/°    | Atom | Atom | Atom | Angle/°    |
|------|------|------|------------|------|------|------|------------|
| C5   | N4   | Cu   | 136.56(8)  | C16  | C15  | B    | 121.66(10) |
| C5   | N4   | N3   | 106.15(9)  | C20  | C15  | C16  | 116.80(11) |
| N2   | C1   | C2   | 111.57(10) | C20  | C15  | B    | 121.48(11) |
| N2   | C1   | C4   | 120.97(11) | C17  | C16  | C15  | 121.98(12) |
| C2   | C1   | C4   | 127.45(11) | C18  | C17  | C16  | 119.63(13) |
| C3   | C2   | C1   | 103.65(11) | C19  | C18  | C17  | 119.84(12) |
| N1   | C3   | C2   | 109.07(11) | C18  | C19  | C20  | 120.12(13) |
| F1   | C4   | C1   | 112.65(11) | C19  | C20  | C15  | 121.57(13) |
| F2   | C4   | F1   | 106.27(12) | C22  | C21  | Cu   | 71.64(10)  |
| F2   | C4   | C1   | 112.98(11) | C21  | C22  | Cu   | 72.20(10)  |
| F3   | C4   | F1   | 106.57(11) | N1   | B    | N3   | 106.61(9)  |
| F3   | C4   | F2   | 107.52(11) | N1   | B    | C9   | 109.10(9)  |
| F3   | C4   | C1   | 110.49(11) | N1   | B    | C15  | 109.98(9)  |
| N4   | C5   | C6   | 111.28(11) | N3   | B    | C9   | 106.44(9)  |
| N4   | C5   | C8   | 121.14(10) | N3   | B    | C15  | 108.36(9)  |
| C6   | C5   | C8   | 127.58(11) | C9   | B    | C15  | 115.90(9)  |

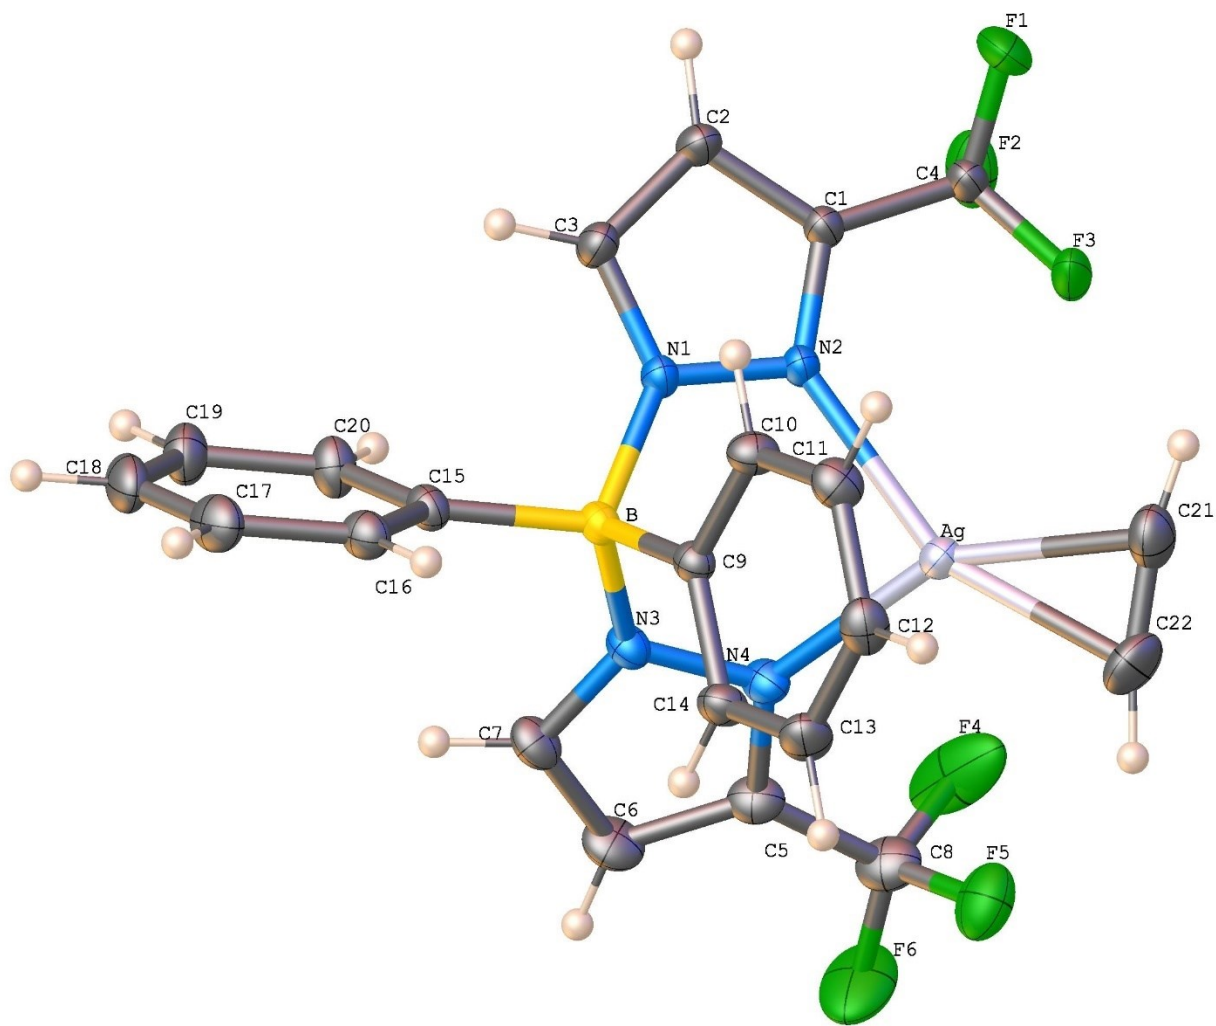

**Figure S34:** X-ray crystal structure and atom labelling of  $[\text{Ph}_2\text{B}(3\text{-(CF}_3\text{)Pz})_2]\text{Ag}(\text{C}_2\text{H}_2)$  (**10**).

**Table S5:** Crystal data and structure refinement for  $[\text{Ph}_2\text{B}(3\text{-(CF}_3\text{)Pz})_2]\text{Ag}(\text{C}_2\text{H}_2)$  (**10**).

|                     |                                                     |
|---------------------|-----------------------------------------------------|
| Identification code | Rad830                                              |
| Empirical formula   | $\text{C}_{22}\text{H}_{16}\text{AgBF}_6\text{N}_4$ |
| Formula weight      | 569.07                                              |
| Temperature/K       | 100.0                                               |
| Crystal system      | monoclinic                                          |
| Space group         | $\text{P2}_1/\text{n}$                              |
| $a/\text{\AA}$      | 14.6979(6)                                          |
| $b/\text{\AA}$      | 10.2199(5)                                          |
| $c/\text{\AA}$      | 15.7068(7)                                          |

|                                               |                                                                |
|-----------------------------------------------|----------------------------------------------------------------|
| $\alpha/^\circ$                               | 90                                                             |
| $\beta/^\circ$                                | 105.8120(10)                                                   |
| $\gamma/^\circ$                               | 90                                                             |
| Volume/ $\text{\AA}^3$                        | 2270.06(18)                                                    |
| Z                                             | 4                                                              |
| $\rho_{\text{calc}}/\text{cm}^3$              | 1.665                                                          |
| $\mu/\text{mm}^{-1}$                          | 0.955                                                          |
| F(000)                                        | 1128.0                                                         |
| Crystal size/ $\text{mm}^3$                   | $0.36 \times 0.29 \times 0.04$                                 |
| Radiation                                     | MoK $\alpha$ ( $\lambda = 0.71073$ )                           |
| $2\theta$ range for data collection/ $^\circ$ | 5.392 to 72.634                                                |
| Index ranges                                  | $-24 \leq h \leq 24, -17 \leq k \leq 16, -26 \leq l \leq 26$   |
| Reflections collected                         | 41532                                                          |
| Independent reflections                       | 10964 [ $R_{\text{int}} = 0.0350, R_{\text{sigma}} = 0.0325$ ] |
| Data/restraints/parameters                    | 10964/0/316                                                    |
| Goodness-of-fit on $F^2$                      | 1.053                                                          |
| Final R indexes [ $I \geq 2\sigma(I)$ ]       | $R_1 = 0.0354, wR_2 = 0.0748$                                  |
| Final R indexes [all data]                    | $R_1 = 0.0501, wR_2 = 0.0812$                                  |
| Largest diff. peak/hole / $e \text{\AA}^{-3}$ | 0.85/-0.84                                                     |

**Table S6:** Bond Lengths for  $[\text{Ph}_2\text{B}(3\text{-(CF}_3\text{)Pz})_2]\text{Ag}(\text{C}_2\text{H}_2)$  (**10**).

| Atom | Atom | Length/ $\text{\AA}$ | Atom | Atom | Length/ $\text{\AA}$ |
|------|------|----------------------|------|------|----------------------|
| Ag   | N2   | 2.2665(12)           | C2   | C3   | 1.382(2)             |
| Ag   | N4   | 2.2415(14)           | C5   | C6   | 1.389(3)             |
| Ag   | C21  | 2.2653(19)           | C5   | C8   | 1.483(2)             |
| Ag   | C22  | 2.2531(19)           | C6   | C7   | 1.382(2)             |
| F1   | C4   | 1.335(2)             | C9   | C10  | 1.403(2)             |
| F2   | C4   | 1.351(2)             | C9   | C14  | 1.403(2)             |

**Table S6:** Bond Lengths for [Ph<sub>2</sub>B(3-(CF<sub>3</sub>)Pz)<sub>2</sub>]Ag(C<sub>2</sub>H<sub>2</sub>) (**10**).

| Atom | Atom | Length/Å   | Atom | Atom | Length/Å |
|------|------|------------|------|------|----------|
| F3   | C4   | 1.3324(19) | C9   | B    | 1.619(2) |
| F4   | C8   | 1.329(2)   | C10  | C11  | 1.392(2) |
| F5   | C8   | 1.328(2)   | C11  | C12  | 1.389(2) |
| F6   | C8   | 1.333(2)   | C12  | C13  | 1.393(2) |
| N1   | N2   | 1.3551(17) | C13  | C14  | 1.389(2) |
| N1   | C3   | 1.3489(19) | C15  | C16  | 1.397(2) |
| N1   | B    | 1.584(2)   | C15  | C20  | 1.405(2) |
| N2   | C1   | 1.3342(19) | C15  | B    | 1.615(2) |
| N3   | N4   | 1.3583(18) | C16  | C17  | 1.399(2) |
| N3   | C7   | 1.347(2)   | C17  | C18  | 1.382(3) |
| N3   | B    | 1.586(2)   | C18  | C19  | 1.389(3) |
| N4   | C5   | 1.336(2)   | C19  | C20  | 1.392(2) |
| C1   | C2   | 1.395(2)   | C21  | C22  | 1.193(3) |
| C1   | C4   | 1.485(2)   |      |      |          |

**Table S7:** Bond Angles for [Ph<sub>2</sub>B(3-(CF<sub>3</sub>)Pz)<sub>2</sub>]Ag(C<sub>2</sub>H<sub>2</sub>) (**10**).

| Atom | Atom | Atom | Angle/°    | Atom | Atom | Atom | Angle/°    |
|------|------|------|------------|------|------|------|------------|
| N4   | Ag   | N2   | 82.76(5)   | C7   | C6   | C5   | 104.02(14) |
| N4   | Ag   | C21  | 154.02(7)  | N3   | C7   | C6   | 108.85(15) |
| N4   | Ag   | C22  | 123.44(7)  | F4   | C8   | F6   | 108.03(18) |
| C21  | Ag   | N2   | 123.21(6)  | F4   | C8   | C5   | 112.66(16) |
| C22  | Ag   | N2   | 153.77(7)  | F5   | C8   | F4   | 104.98(19) |
| C22  | Ag   | C21  | 30.63(8)   | F5   | C8   | F6   | 106.04(17) |
| N2   | N1   | B    | 119.76(11) | F5   | C8   | C5   | 113.42(14) |
| C3   | N1   | N2   | 109.65(12) | F6   | C8   | C5   | 111.24(17) |
| C3   | N1   | B    | 129.84(12) | C10  | C9   | C14  | 116.24(14) |
| N1   | N2   | Ag   | 115.42(9)  | C10  | C9   | B    | 121.26(13) |
| C1   | N2   | Ag   | 136.04(10) | C14  | C9   | B    | 122.49(13) |
| C1   | N2   | N1   | 106.19(12) | C11  | C10  | C9   | 122.38(15) |



**Table S7:** Bond Angles for [Ph<sub>2</sub>B(3-(CF<sub>3</sub>)Pz)<sub>2</sub>]Ag(C<sub>2</sub>H<sub>2</sub>) (**10**).

| Atom | Atom | Atom | Angle/°    | Atom | Atom | Atom | Angle/°    |
|------|------|------|------------|------|------|------|------------|
| N4   | N3   | B    | 120.18(12) | C12  | C11  | C10  | 119.89(15) |
| C7   | N3   | N4   | 109.64(13) | C11  | C12  | C13  | 119.18(15) |
| C7   | N3   | B    | 129.43(13) | C14  | C13  | C12  | 120.24(15) |
| N3   | N4   | Ag   | 115.63(9)  | C13  | C14  | C9   | 122.06(15) |
| C5   | N4   | Ag   | 137.27(12) | C16  | C15  | C20  | 116.71(14) |
| C5   | N4   | N3   | 106.19(13) | C16  | C15  | B    | 121.37(14) |
| N2   | C1   | C2   | 111.53(13) | C20  | C15  | B    | 121.92(13) |
| N2   | C1   | C4   | 119.53(13) | C15  | C16  | C17  | 121.43(16) |
| C2   | C1   | C4   | 128.88(14) | C18  | C17  | C16  | 120.34(16) |
| C3   | C2   | C1   | 103.52(13) | C17  | C18  | C19  | 119.80(16) |
| N1   | C3   | C2   | 109.09(13) | C18  | C19  | C20  | 119.33(17) |
| F1   | C4   | F2   | 105.32(14) | C19  | C20  | C15  | 122.38(16) |
| F1   | C4   | C1   | 111.88(14) | C22  | C21  | Ag   | 74.12(13)  |
| F2   | C4   | C1   | 112.43(14) | C21  | C22  | Ag   | 75.25(13)  |
| F3   | C4   | F1   | 108.44(14) | N1   | B    | N3   | 107.70(11) |
| F3   | C4   | F2   | 105.84(14) | N1   | B    | C9   | 107.68(12) |
| F3   | C4   | C1   | 112.48(13) | N1   | B    | C15  | 108.87(12) |
| N4   | C5   | C6   | 111.29(15) | N3   | B    | C9   | 107.41(12) |
| N4   | C5   | C8   | 119.62(16) | N3   | B    | C15  | 109.20(12) |
| C6   | C5   | C8   | 129.09(15) | C15  | B    | C9   | 115.70(12) |

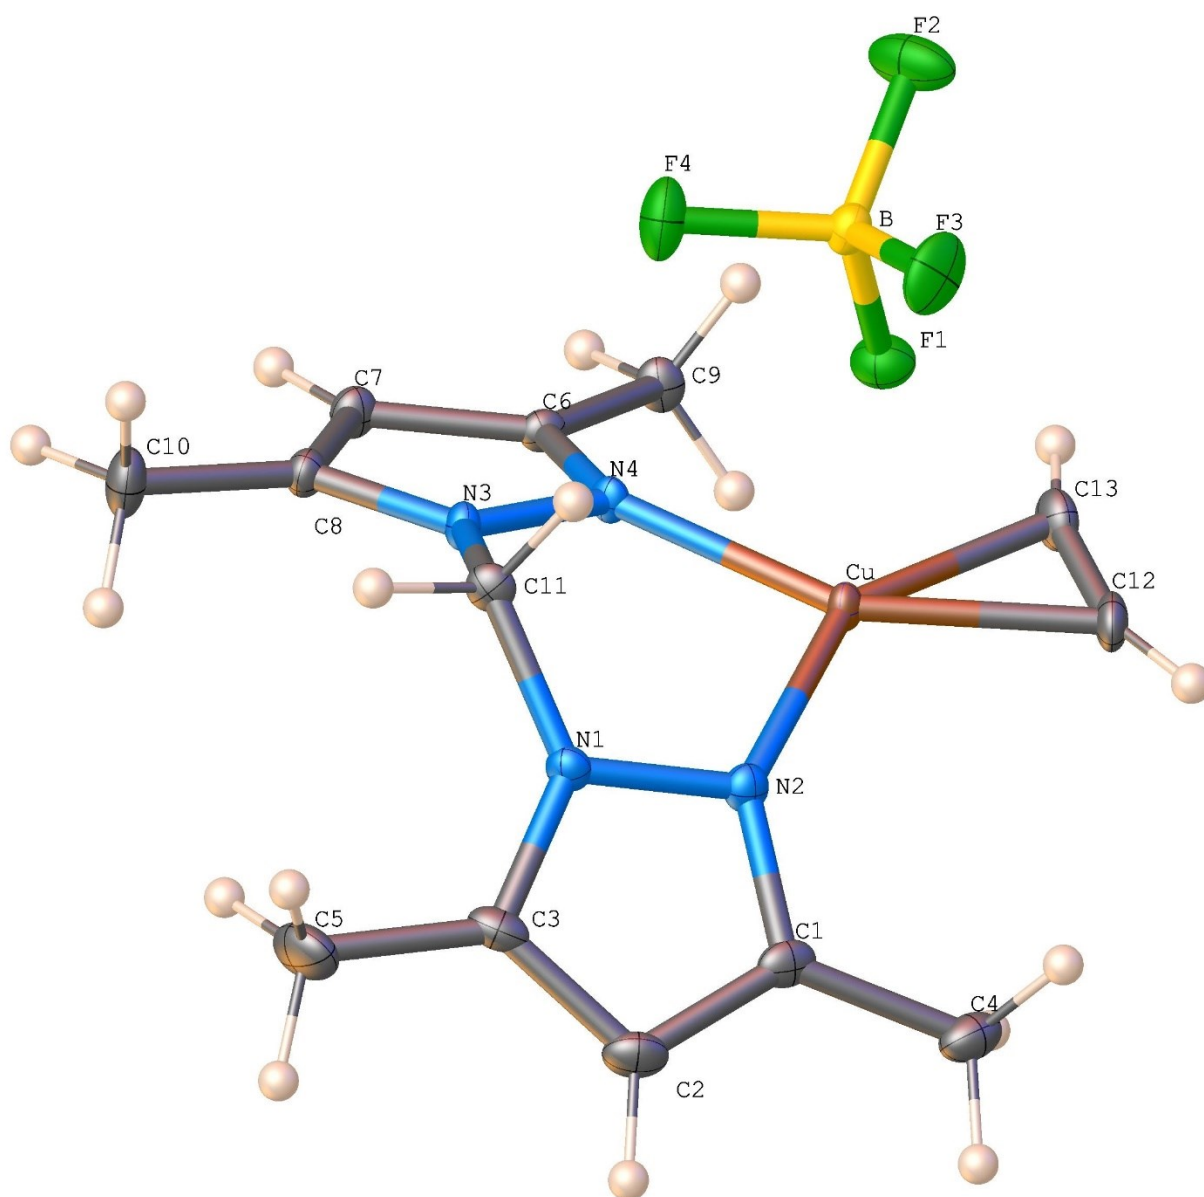

**Figure S35:** X-ray crystal structure and atom labelling of  $[\text{H}_2\text{C}(3,5\text{-(Me)}_2\text{Pz})_2\text{Cu}(\text{C}_2\text{H}_2)][\text{BF}_4]$  (**11**).

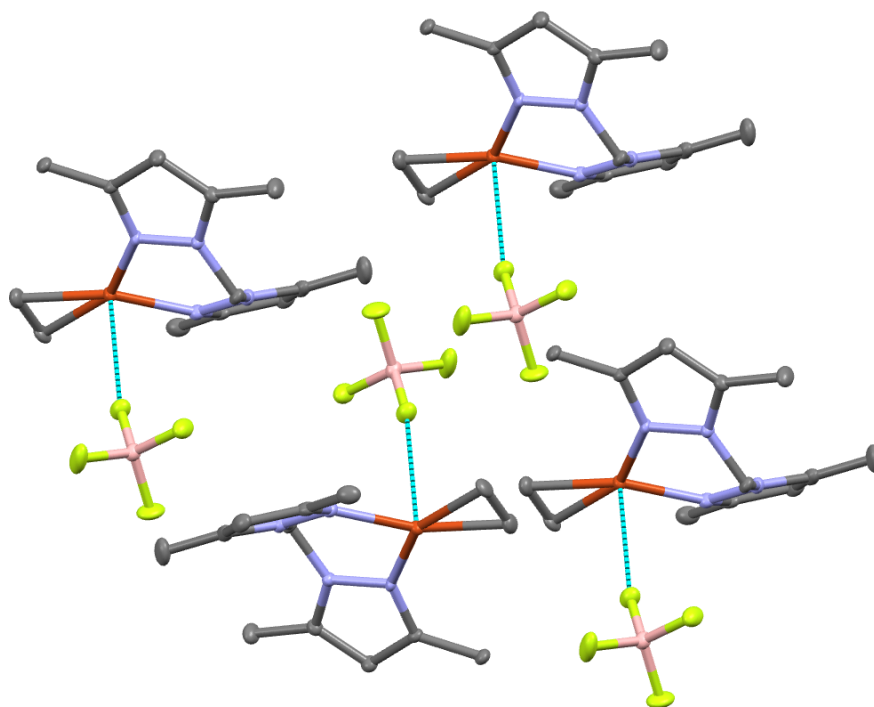

**Figure S36:** A view of the crystal packing diagram of  $[\{H_2C(3,5-(Me)_2Pz)_2\}Cu(C_2H_2)][BF_4]$  (**11**) showing fluorine atoms of  $[BF_4]^-$  close to copper sites.

**Table S8:** Crystal data and structure refinement for  $[\{H_2C(3,5-(Me)_2Pz)_2\}Cu(C_2H_2)][BF_4]$  (**11**).

|                        |                         |
|------------------------|-------------------------|
| Identification code    | rad840                  |
| Empirical formula      | $C_{13}H_{18}BCuF_4N_4$ |
| Formula weight         | 380.66                  |
| Temperature/K          | 100.0                   |
| Crystal system         | triclinic               |
| Space group            | P-1                     |
| $a/\text{\AA}$         | 7.9267(5)               |
| $b/\text{\AA}$         | 10.4752(7)              |
| $c/\text{\AA}$         | 10.6827(7)              |
| $\alpha/^\circ$        | 107.079(2)              |
| $\beta/^\circ$         | 100.3190(10)            |
| $\gamma/^\circ$        | 102.0130(10)            |
| Volume/ $\text{\AA}^3$ | 801.49(9)               |

|                                                |                                                               |
|------------------------------------------------|---------------------------------------------------------------|
| Z                                              | 2                                                             |
| $\rho_{\text{calc}}/\text{cm}^3$               | 1.577                                                         |
| $\mu/\text{mm}^{-1}$                           | 1.405                                                         |
| F(000)                                         | 388.0                                                         |
| Crystal size/ $\text{mm}^3$                    | $0.2 \times 0.16 \times 0.02$                                 |
| Radiation                                      | Mo K $\alpha$ ( $\lambda = 0.71073$ )                         |
| 2 $\theta$ range for data collection/ $^\circ$ | 5.436 to 58.256                                               |
| Index ranges                                   | $-10 \leq h \leq 10, -14 \leq k \leq 14, -14 \leq l \leq 14$  |
| Reflections collected                          | 27886                                                         |
| Independent reflections                        | 4311 [ $R_{\text{int}} = 0.0609, R_{\text{sigma}} = 0.0442$ ] |
| Data/restraints/parameters                     | 4311/0/220                                                    |
| Goodness-of-fit on $F^2$                       | 1.072                                                         |
| Final R indexes [ $I \geq 2\sigma(I)$ ]        | $R_1 = 0.0492, wR_2 = 0.0855$                                 |
| Final R indexes [all data]                     | $R_1 = 0.0678, wR_2 = 0.0931$                                 |
| Largest diff. peak/hole / $e \text{ \AA}^{-3}$ | 0.68/-0.64                                                    |

**Table S9:** Bond Lengths for [ $\{\text{H}_2\text{C}(3,5\text{-(Me)}_2\text{Pz})_2\}\text{Cu}(\text{C}_2\text{H}_2)\text{][BF}_4$ ] (**11**).

| Atom | Atom | Length/ $\text{\AA}$ | Atom | Atom | Length/ $\text{\AA}$ |
|------|------|----------------------|------|------|----------------------|
| Cu   | N4   | 1.978(2)             | N1   | C11  | 1.449(3)             |
| Cu   | N2   | 1.977(2)             | N4   | C6   | 1.342(3)             |
| Cu   | C13  | 1.970(3)             | N2   | C1   | 1.341(4)             |
| Cu   | C12  | 1.971(3)             | C13  | C12  | 1.203(4)             |
| F1   | B    | 1.394(4)             | C9   | C6   | 1.488(4)             |
| F3   | B    | 1.387(3)             | C6   | C7   | 1.397(4)             |
| F2   | B    | 1.387(4)             | C8   | C7   | 1.377(4)             |
| F4   | B    | 1.387(3)             | C8   | C10  | 1.486(4)             |
| N3   | N4   | 1.372(3)             | C1   | C2   | 1.394(4)             |
| N3   | C8   | 1.358(3)             | C1   | C4   | 1.490(4)             |

**Table S9:** Bond Lengths for [ $\{\text{H}_2\text{C}(3,5\text{-(Me)}_2\text{Pz})_2\}\text{Cu}(\text{C}_2\text{H}_2)\text{][BF}_4\text{] (11)$ .

| Atom | Atom | Length/Å | Atom | Atom | Length/Å |
|------|------|----------|------|------|----------|
| N3   | C11  | 1.445(3) | C3   | C2   | 1.372(4) |
| N1   | N2   | 1.367(3) | C3   | C5   | 1.490(4) |
| N1   | C3   | 1.358(3) |      |      |          |

**Table S10:** Bond Angles for [ $\{\text{H}_2\text{C}(3,5\text{-(Me)}_2\text{Pz})_2\}\text{Cu}(\text{C}_2\text{H}_2)\text{][BF}_4\text{] (11)$ .

| Atom | Atom | Atom | Angle/°    | Atom | Atom | Atom | Angle/°  |
|------|------|------|------------|------|------|------|----------|
| N2   | Cu   | N4   | 97.14(9)   | N4   | C6   | C7   | 109.9(2) |
| C13  | Cu   | N4   | 114.63(11) | C7   | C6   | C9   | 128.0(2) |
| C13  | Cu   | N2   | 147.43(11) | N3   | C8   | C7   | 106.2(2) |
| C13  | Cu   | C12  | 35.55(13)  | N3   | C8   | C10  | 122.8(2) |
| C12  | Cu   | N4   | 150.11(11) | C7   | C8   | C10  | 131.0(3) |
| C12  | Cu   | N2   | 112.67(11) | N2   | C1   | C2   | 109.7(3) |
| N4   | N3   | C11  | 119.5(2)   | N2   | C1   | C4   | 121.3(3) |
| C8   | N3   | N4   | 111.4(2)   | C2   | C1   | C4   | 129.0(3) |
| C8   | N3   | C11  | 128.8(2)   | N1   | C3   | C2   | 106.2(2) |
| N2   | N1   | C11  | 117.8(2)   | N1   | C3   | C5   | 123.4(3) |
| C3   | N1   | N2   | 111.3(2)   | C2   | C3   | C5   | 130.4(3) |
| C3   | N1   | C11  | 130.8(2)   | N3   | C11  | N1   | 111.2(2) |
| N3   | N4   | Cu   | 117.81(16) | C3   | C2   | C1   | 107.1(3) |
| C6   | N4   | Cu   | 135.33(18) | C8   | C7   | C6   | 106.9(2) |
| C6   | N4   | N3   | 105.6(2)   | F3   | B    | F1   | 110.5(2) |
| N1   | N2   | Cu   | 117.55(17) | F3   | B    | F2   | 109.7(3) |
| C1   | N2   | Cu   | 131.1(2)   | F3   | B    | F4   | 108.7(2) |
| C1   | N2   | N1   | 105.8(2)   | F2   | B    | F1   | 109.2(2) |
| C12  | C13  | Cu   | 72.24(19)  | F2   | B    | F4   | 109.6(2) |
| C13  | C12  | Cu   | 72.20(19)  | F4   | B    | F1   | 109.0(2) |

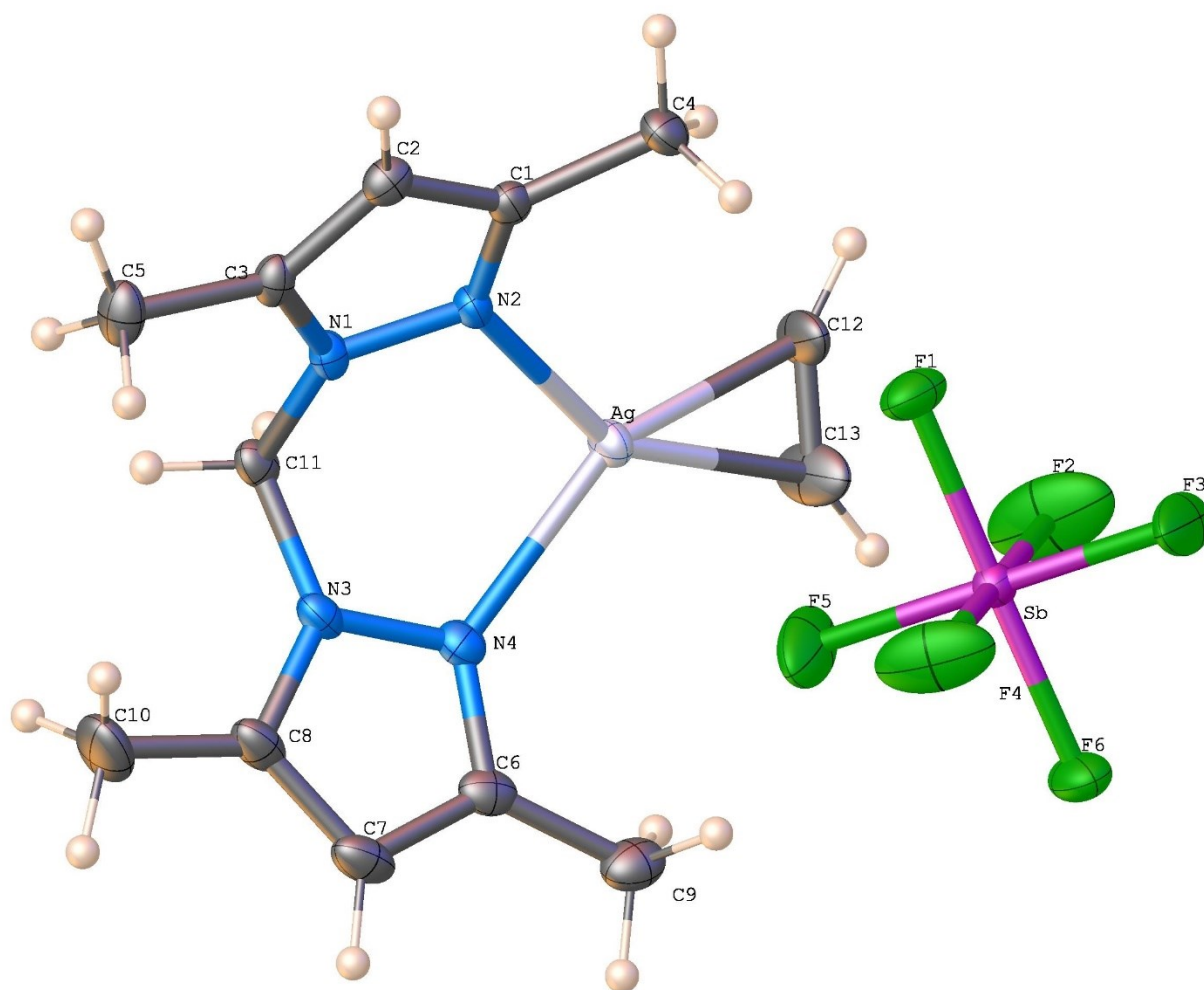

**Figure S37:** X-ray crystal structure and atom labelling of  $[\{H_2C(3,5-(Me)_2Pz)_2\}Ag(C_2H_2)][SbF_6]$  (12).

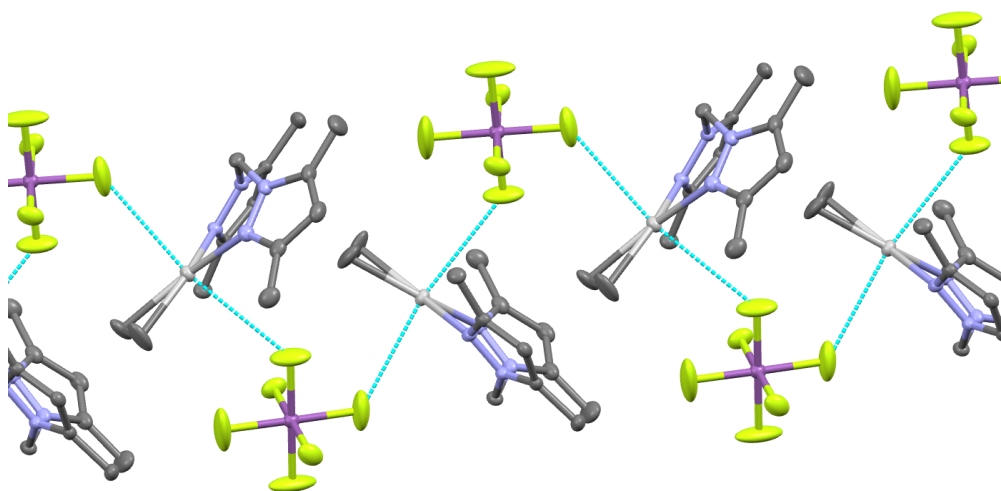

**Figure S38:** A view of the crystal packing diagram of  $[\{\text{H}_2\text{C}(3,5\text{-(Me)}_2\text{Pz})_2\}\text{Ag}(\text{C}_2\text{H}_2)][\text{SbF}_6]$  (**12**) showing fluorine atoms of  $[\text{SbF}_6]^-$  close to silver sites.

**Table S11:** Crystal data and structure refinement for  $[\{\text{H}_2\text{C}(3,5\text{-(Me)}_2\text{Pz})_2\}\text{Ag}(\text{C}_2\text{H}_2)][\text{SbF}_6]$  (**12**).

|                                  |                                                             |
|----------------------------------|-------------------------------------------------------------|
| Identification code              | rad838                                                      |
| Empirical formula                | $\text{C}_{13}\text{H}_{18}\text{AgF}_6\text{N}_4\text{Sb}$ |
| Formula weight                   | 573.93                                                      |
| Temperature/K                    | 100.0                                                       |
| Crystal system                   | monoclinic                                                  |
| Space group                      | $\text{P2}_1/\text{n}$                                      |
| $a/\text{\AA}$                   | 11.7240(5)                                                  |
| $b/\text{\AA}$                   | 12.2179(5)                                                  |
| $c/\text{\AA}$                   | 12.8999(6)                                                  |
| $\alpha/^\circ$                  | 90                                                          |
| $\beta/^\circ$                   | 93.091(2)                                                   |
| $\gamma/^\circ$                  | 90                                                          |
| Volume/ $\text{\AA}^3$           | 1845.13(14)                                                 |
| Z                                | 4                                                           |
| $\rho_{\text{calc}}/\text{cm}^3$ | 2.066                                                       |
| $\mu/\text{mm}^{-1}$             | 2.586                                                       |

|                                                  |                                                                        |
|--------------------------------------------------|------------------------------------------------------------------------|
| F(000)                                           | 1104.0                                                                 |
| Crystal size/mm <sup>3</sup>                     | 0.46 × 0.36 × 0.17                                                     |
| Radiation                                        | Mo K $\alpha$ ( $\lambda$ = 0.71073)                                   |
| 2 $\Theta$ range for data collection/ $^{\circ}$ | 4.818 to 64.06                                                         |
| Index ranges                                     | -17 $\leq$ h $\leq$ 17, -18 $\leq$ k $\leq$ 18, -19 $\leq$ l $\leq$ 19 |
| Reflections collected                            | 89480                                                                  |
| Independent reflections                          | 6436 [ $R_{\text{int}}$ = 0.0430, $R_{\text{sigma}}$ = 0.0168]         |
| Data/restraints/parameters                       | 6436/0/231                                                             |
| Goodness-of-fit on F <sup>2</sup>                | 1.022                                                                  |
| Final R indexes [ $I \geq 2\sigma(I)$ ]          | $R_1$ = 0.0352, $wR_2$ = 0.0678                                        |
| Final R indexes [all data]                       | $R_1$ = 0.0429, $wR_2$ = 0.0744                                        |
| Largest diff. peak/hole / e $\text{\AA}^{-3}$    | 1.65/-1.44                                                             |

**Table S12:** Bond Lengths for [ $\{\text{H}_2\text{C}(3,5\text{-(Me)}_2\text{Pz})_2\}\text{Ag}(\text{C}_2\text{H}_2)\text{][SbF}_6]$  (**12**).

| Atom | Atom | Length/ $\text{\AA}$ | Atom | Atom | Length/ $\text{\AA}$ |
|------|------|----------------------|------|------|----------------------|
| Sb   | F1   | 1.867(2)             | N3   | N4   | 1.366(4)             |
| Sb   | F2   | 1.853(3)             | N3   | C8   | 1.360(4)             |
| Sb   | F3   | 1.857(2)             | N3   | C11  | 1.448(4)             |
| Sb   | F4   | 1.865(3)             | N4   | C6   | 1.335(4)             |
| Sb   | F5   | 1.862(2)             | C1   | C2   | 1.404(4)             |
| Sb   | F6   | 1.874(2)             | C1   | C4   | 1.492(4)             |
| Ag   | N2   | 2.220(2)             | C2   | C3   | 1.381(4)             |
| Ag   | N4   | 2.235(3)             | C3   | C5   | 1.494(4)             |
| Ag   | C12  | 2.251(3)             | C6   | C7   | 1.407(5)             |
| Ag   | C13  | 2.237(4)             | C6   | C9   | 1.491(5)             |
| N1   | N2   | 1.366(3)             | C7   | C8   | 1.375(5)             |
| N1   | C3   | 1.355(4)             | C8   | C10  | 1.487(5)             |
| N1   | C11  | 1.444(4)             | C12  | C13  | 1.203(5)             |
| N2   | C1   | 1.334(4)             |      |      |                      |



**Table S13:** Bond Angles for [ $\{\text{H}_2\text{C}(3,5\text{-}(\text{Me})_2\text{Pz})_2\}\text{Ag}(\text{C}_2\text{H}_2)\}][\text{SbF}_6]$  (**12**).

| Atom | Atom | Atom | Angle/°    | Atom | Atom | Atom | Angle/°    |
|------|------|------|------------|------|------|------|------------|
| F1   | Sb   | F6   | 178.14(11) | C1   | N2   | Ag   | 132.80(19) |
| F2   | Sb   | F1   | 90.72(13)  | C1   | N2   | N1   | 106.0(2)   |
| F2   | Sb   | F3   | 90.3(2)    | N4   | N3   | C11  | 118.6(2)   |
| F2   | Sb   | F4   | 179.1(2)   | C8   | N3   | N4   | 111.4(3)   |
| F2   | Sb   | F5   | 89.8(2)    | C8   | N3   | C11  | 130.0(3)   |
| F2   | Sb   | F6   | 90.40(13)  | N3   | N4   | Ag   | 117.77(18) |
| F3   | Sb   | F1   | 89.72(11)  | C6   | N4   | Ag   | 133.7(2)   |
| F3   | Sb   | F4   | 90.6(2)    | C6   | N4   | N3   | 106.0(3)   |
| F3   | Sb   | F5   | 179.92(19) | N2   | C1   | C2   | 110.1(3)   |
| F3   | Sb   | F6   | 88.79(12)  | N2   | C1   | C4   | 120.3(3)   |
| F4   | Sb   | F1   | 89.56(12)  | C2   | C1   | C4   | 129.5(3)   |
| F4   | Sb   | F6   | 89.34(12)  | C3   | C2   | C1   | 106.1(3)   |
| F5   | Sb   | F1   | 90.32(11)  | N1   | C3   | C2   | 106.6(2)   |
| F5   | Sb   | F4   | 89.30(18)  | N1   | C3   | C5   | 123.0(3)   |
| F5   | Sb   | F6   | 91.18(11)  | C2   | C3   | C5   | 130.3(3)   |
| N2   | Ag   | N4   | 88.66(9)   | N4   | C6   | C7   | 109.8(3)   |
| N2   | Ag   | C12  | 121.48(12) | N4   | C6   | C9   | 121.2(3)   |
| N2   | Ag   | C13  | 151.67(13) | C7   | C6   | C9   | 129.0(3)   |
| N4   | Ag   | C12  | 149.78(12) | C8   | C7   | C6   | 106.5(3)   |
| N4   | Ag   | C13  | 119.27(13) | N3   | C8   | C7   | 106.3(3)   |
| C13  | Ag   | C12  | 31.10(14)  | N3   | C8   | C10  | 123.0(3)   |
| N2   | N1   | C11  | 117.8(2)   | C7   | C8   | C10  | 130.7(3)   |
| C3   | N1   | N2   | 111.3(2)   | N1   | C11  | N3   | 112.8(2)   |
| C3   | N1   | C11  | 130.8(2)   | C13  | C12  | Ag   | 73.8(2)    |
| N1   | N2   | Ag   | 118.89(17) | C12  | C13  | Ag   | 75.1(2)    |

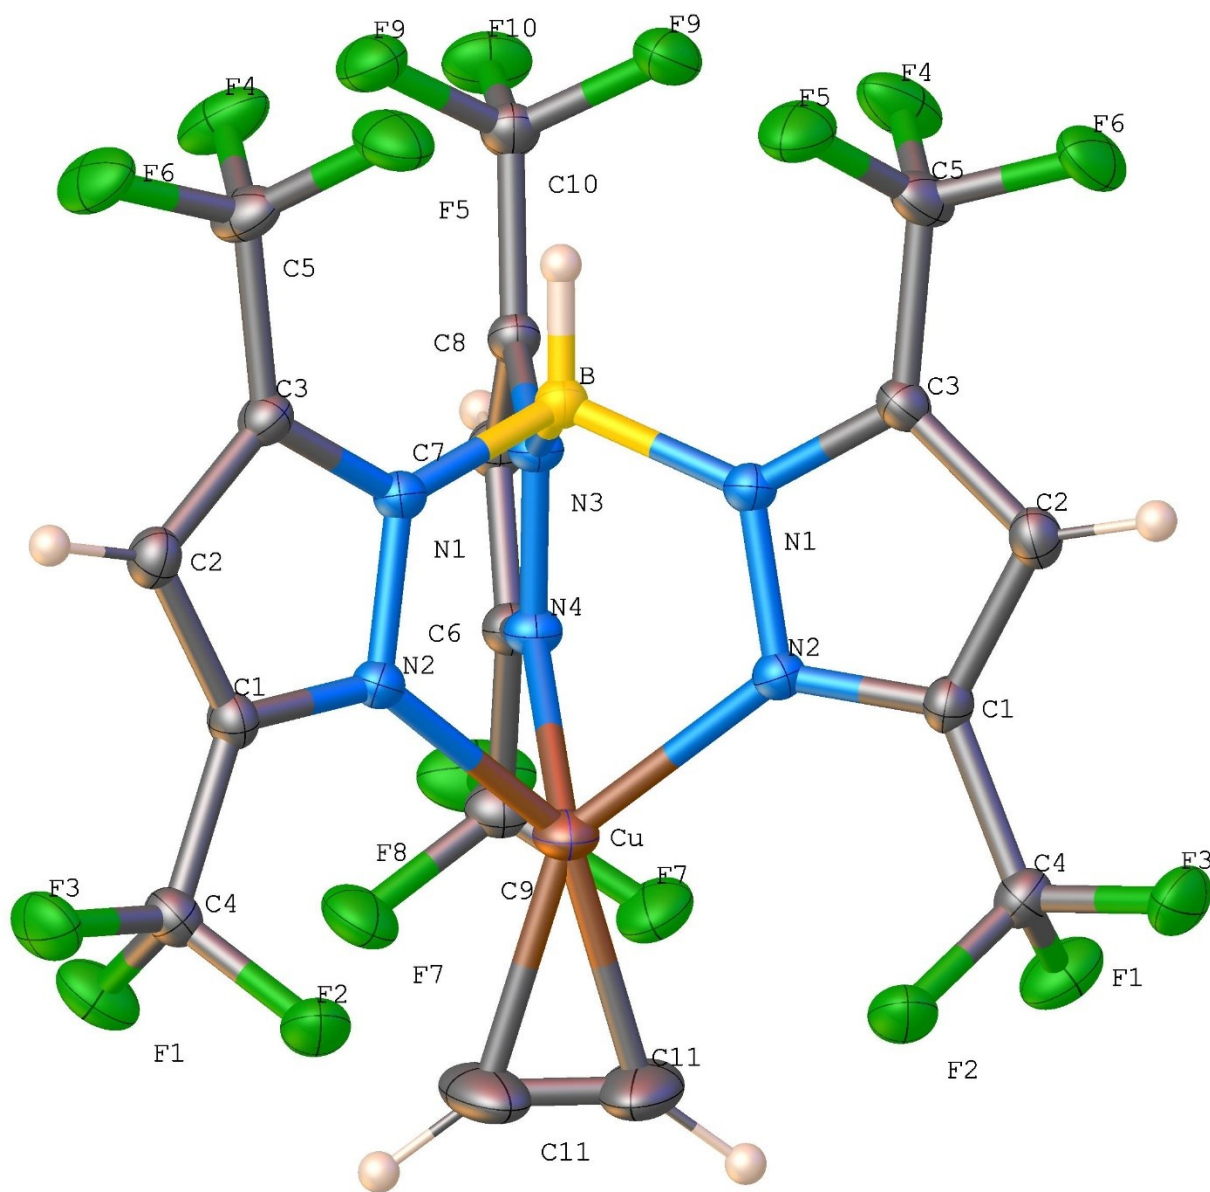

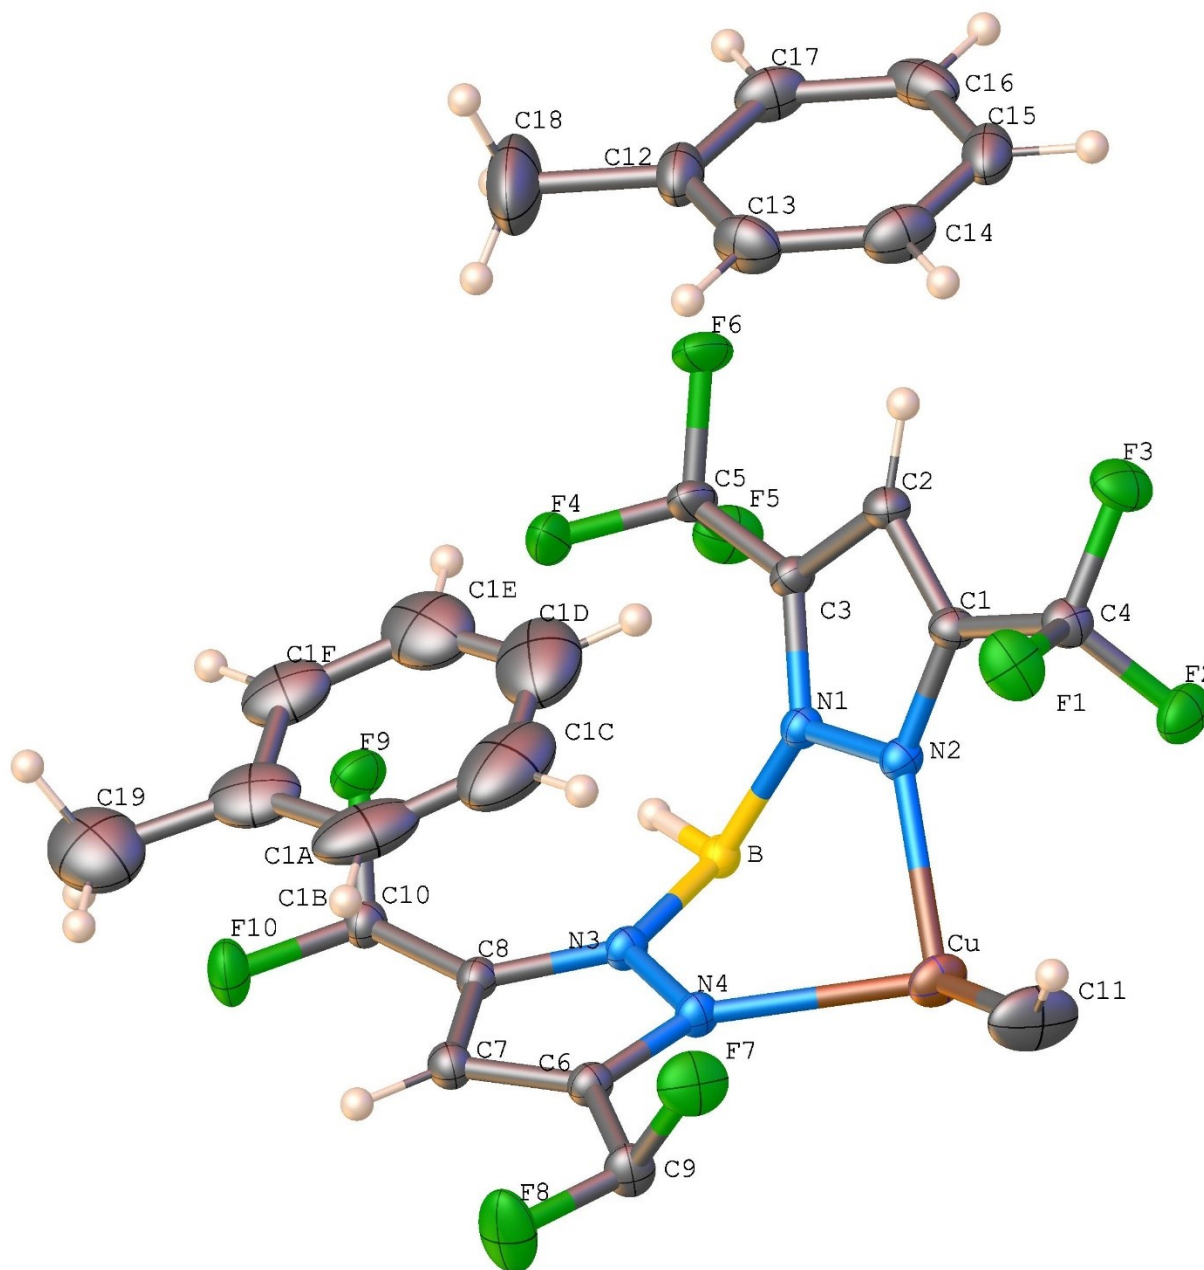

**Figure S39:** X-ray crystal structure and atom labelling of the asymmetric unit of  $[\text{HB}(3,5\text{-(CF}_3)_2\text{Pz)}_3]\text{Cu}(\text{C}_2\text{H}_2)$  (**13**) with toluene present in the crystal lattice.

**Table S14:** Crystal data and structure refinement for  $[\text{HB}(3,5\text{-(CF}_3)_2\text{Pz)}_3]\text{Cu}(\text{C}_2\text{H}_2)$  (**13**).

|                     |                                                        |
|---------------------|--------------------------------------------------------|
| Identification code | hrd36                                                  |
| Empirical formula   | $\text{C}_{31}\text{H}_{22}\text{BCuF}_{18}\text{N}_6$ |
| Formula weight      | 894.89                                                 |

## Supporting Information

|                                             |                                                               |
|---------------------------------------------|---------------------------------------------------------------|
| Temperature/K                               | 100.0                                                         |
| Crystal system                              | monoclinic                                                    |
| Space group                                 | P2 <sub>1</sub> /m                                            |
| a/Å                                         | 11.0640(5)                                                    |
| b/Å                                         | 13.6074(6)                                                    |
| c/Å                                         | 11.4278(5)                                                    |
| α/°                                         | 90                                                            |
| β/°                                         | 91.989(2)                                                     |
| γ/°                                         | 90                                                            |
| Volume/Å <sup>3</sup>                       | 1719.44(13)                                                   |
| Z                                           | 2                                                             |
| ρ <sub>calc</sub> /cm <sup>3</sup>          | 1.728                                                         |
| μ/mm <sup>-1</sup>                          | 0.768                                                         |
| F(000)                                      | 892.0                                                         |
| Crystal size/mm <sup>3</sup>                | 0.27 × 0.25 × 0.03                                            |
| Radiation                                   | MoKα (λ = 0.71073)                                            |
| 2θ range for data collection/°              | 5.038 to 64.058                                               |
| Index ranges                                | -16 ≤ h ≤ 16, -20 ≤ k ≤ 20, -16 ≤ l ≤ 17                      |
| Reflections collected                       | 30468                                                         |
| Independent reflections                     | 6197 [R <sub>int</sub> = 0.0333, R <sub>sigma</sub> = 0.0269] |
| Data/restraints/parameters                  | 6197/136/319                                                  |
| Goodness-of-fit on F <sup>2</sup>           | 1.039                                                         |
| Final R indexes [I ≥ 2σ (I)]                | R <sub>1</sub> = 0.0534, wR <sub>2</sub> = 0.1104             |
| Final R indexes [all data]                  | R <sub>1</sub> = 0.0842, wR <sub>2</sub> = 0.1365             |
| Largest diff. peak/hole / e Å <sup>-3</sup> | 1.39/-1.48                                                    |

**Table S15:** Bond Lengths for [HB(3,5-(CF<sub>3</sub>)<sub>2</sub>Pz)<sub>3</sub>]Cu(C<sub>2</sub>H<sub>2</sub>) (**13**).

| Atom | Atom             | Length/Å   | Atom | Atom             | Length/Å  |
|------|------------------|------------|------|------------------|-----------|
| Cu   | N2 <sup>1</sup>  | 2.0466(17) | C2   | C1               | 1.398(3)  |
| Cu   | N2               | 2.0466(17) | C2   | C3               | 1.378(3)  |
| Cu   | N4               | 2.179(3)   | C1   | C4               | 1.493(3)  |
| Cu   | C11 <sup>1</sup> | 1.986(3)   | C6   | C7               | 1.390(4)  |
| Cu   | C11              | 1.986(3)   | C6   | C9               | 1.501(4)  |
| F9   | C10              | 1.336(2)   | C7   | C8               | 1.370(4)  |
| F3   | C4               | 1.330(3)   | C3   | C5               | 1.495(3)  |
| F6   | C5               | 1.336(3)   | C8   | C10              | 1.492(4)  |
| F2   | C4               | 1.338(3)   | C13  | C12              | 1.396(6)  |
| F10  | C10              | 1.340(4)   | C13  | C14              | 1.377(6)  |
| F1   | C4               | 1.344(3)   | C12  | C17              | 1.385(6)  |
| F5   | C5               | 1.339(3)   | C12  | C18              | 1.506(6)  |
| F7   | C9               | 1.334(2)   | C14  | C15              | 1.375(6)  |
| F4   | C5               | 1.334(3)   | C17  | C16              | 1.384(6)  |
| F8   | C9               | 1.328(4)   | C15  | C16              | 1.374(6)  |
| N2   | N1               | 1.358(2)   | C11  | C11 <sup>1</sup> | 1.134(7)  |
| N2   | C1               | 1.332(3)   | C19  | C1A              | 1.501(10) |
| N3   | N4               | 1.361(3)   | C1A  | C1B              | 1.381(8)  |
| N3   | C8               | 1.362(4)   | C1A  | C1F              | 1.371(8)  |
| N3   | B                | 1.552(4)   | C1B  | C1C              | 1.393(9)  |
| N4   | C6               | 1.330(4)   | C1C  | C1D              | 1.425(9)  |
| N1   | C3               | 1.357(3)   | C1D  | C1E              | 1.330(9)  |
| N1   | B                | 1.565(3)   | C1E  | C1F              | 1.392(9)  |

<sup>1</sup>+X,3/2-Y,+Z**Table S16:** Bond Angles for [HB(3,5-(CF<sub>3</sub>)<sub>2</sub>Pz)<sub>3</sub>]Cu(C<sub>2</sub>H<sub>2</sub>) (**13**).

| Atom            | Atom | Atom | Angle/°   | Atom | Atom | Atom | Angle/°  |
|-----------------|------|------|-----------|------|------|------|----------|
| N2 <sup>1</sup> | Cu   | N2   | 90.17(10) | N3   | C8   | C10  | 124.1(3) |
| N2              | Cu   | N4   | 88.25(7)  | C7   | C8   | C10  | 127.0(3) |

**Table S16:** Bond Angles for [HB(3,5-(CF<sub>3</sub>)<sub>2</sub>Pz)<sub>3</sub>]Cu(C<sub>2</sub>H<sub>2</sub>) (**13**).

| Atom             | Atom | Atom            | Angle/°    | Atom             | Atom | Atom            | Angle/°    |
|------------------|------|-----------------|------------|------------------|------|-----------------|------------|
| N2 <sup>1</sup>  | Cu   | N4              | 88.25(7)   | F9 <sup>1</sup>  | C10  | F9              | 106.5(2)   |
| C11              | Cu   | N2 <sup>1</sup> | 144.71(12) | F9 <sup>1</sup>  | C10  | F10             | 107.06(17) |
| C11 <sup>1</sup> | Cu   | N2 <sup>1</sup> | 114.34(10) | F9               | C10  | F10             | 107.06(17) |
| C11 <sup>1</sup> | Cu   | N2              | 144.71(12) | F9 <sup>1</sup>  | C10  | C8              | 113.13(16) |
| C11              | Cu   | N2              | 114.34(10) | F9               | C10  | C8              | 113.13(16) |
| C11              | Cu   | N4              | 116.08(13) | F10              | C10  | C8              | 109.6(3)   |
| C11 <sup>1</sup> | Cu   | N4              | 116.08(13) | C14              | C13  | C12             | 120.9(4)   |
| C11 <sup>1</sup> | Cu   | C11             | 33.16(19)  | C13              | C12  | C18             | 121.6(5)   |
| N1               | N2   | Cu              | 116.83(13) | C17              | C12  | C13             | 118.0(3)   |
| C1               | N2   | Cu              | 136.69(14) | C17              | C12  | C18             | 120.4(5)   |
| C1               | N2   | N1              | 106.47(16) | F6               | C5   | F5              | 107.49(18) |
| N4               | N3   | C8              | 109.4(2)   | F6               | C5   | C3              | 109.84(19) |
| N4               | N3   | B               | 118.9(2)   | F5               | C5   | C3              | 112.44(19) |
| C8               | N3   | B               | 131.7(2)   | F4               | C5   | F6              | 107.60(19) |
| N3               | N4   | Cu              | 115.61(18) | F4               | C5   | F5              | 107.10(19) |
| C6               | N4   | Cu              | 138.7(2)   | F4               | C5   | C3              | 112.14(19) |
| C6               | N4   | N3              | 105.7(2)   | F7               | C9   | F7 <sup>1</sup> | 106.4(3)   |
| N2               | N1   | B               | 120.48(18) | F7               | C9   | C6              | 112.22(17) |
| C3               | N1   | N2              | 108.85(16) | F7 <sup>1</sup>  | C9   | C6              | 112.22(17) |
| C3               | N1   | B               | 130.67(18) | F8               | C9   | F7              | 107.62(18) |
| C3               | C2   | C1              | 103.07(18) | F8               | C9   | F7 <sup>1</sup> | 107.62(18) |
| N2               | C1   | C2              | 111.86(18) | F8               | C9   | C6              | 110.5(3)   |
| N2               | C1   | C4              | 120.35(18) | C15              | C14  | C13             | 120.4(4)   |
| C2               | C1   | C4              | 127.79(19) | C16              | C17  | C12             | 120.7(3)   |
| N4               | C6   | C7              | 112.1(3)   | C16              | C15  | C14             | 119.5(4)   |
| N4               | C6   | C9              | 120.0(3)   | C15              | C16  | C17             | 120.5(3)   |
| C7               | C6   | C9              | 127.9(3)   | C11 <sup>1</sup> | C11  | Cu              | 73.42(9)   |
| C8               | C7   | C6              | 103.9(3)   | N3               | B    | N1              | 108.81(16) |
| N1               | C3   | C2              | 109.76(18) | N3               | B    | N1 <sup>1</sup> | 108.81(16) |
| N1               | C3   | C5              | 123.64(19) | N1               | B    | N1 <sup>1</sup> | 108.1(2)   |

**Table S16:** Bond Angles for [HB(3,5-(CF<sub>3</sub>)<sub>2</sub>Pz)<sub>3</sub>]Cu(C<sub>2</sub>H<sub>2</sub>) (**13**).

| Atom | Atom | Atom | Angle/°    | Atom | Atom | Atom | Angle/°  |
|------|------|------|------------|------|------|------|----------|
| C2   | C3   | C5   | 126.60(19) | C1B  | C1A  | C19  | 129.8(7) |
| F3   | C4   | F2   | 107.51(18) | C1F  | C1A  | C19  | 111.7(7) |
| F3   | C4   | F1   | 107.33(18) | C1F  | C1A  | C1B  | 118.6(7) |
| F3   | C4   | C1   | 110.99(18) | C1A  | C1B  | C1C  | 120.1(8) |
| F2   | C4   | F1   | 106.19(18) | C1B  | C1C  | C1D  | 120.8(8) |
| F2   | C4   | C1   | 112.45(18) | C1E  | C1D  | C1C  | 116.8(8) |
| F1   | C4   | C1   | 112.06(18) | C1D  | C1E  | C1F  | 123.1(8) |
| N3   | C8   | C7   | 108.9(3)   | C1A  | C1F  | C1E  | 120.6(7) |

<sup>1</sup>+X,3/2-Y,+Z

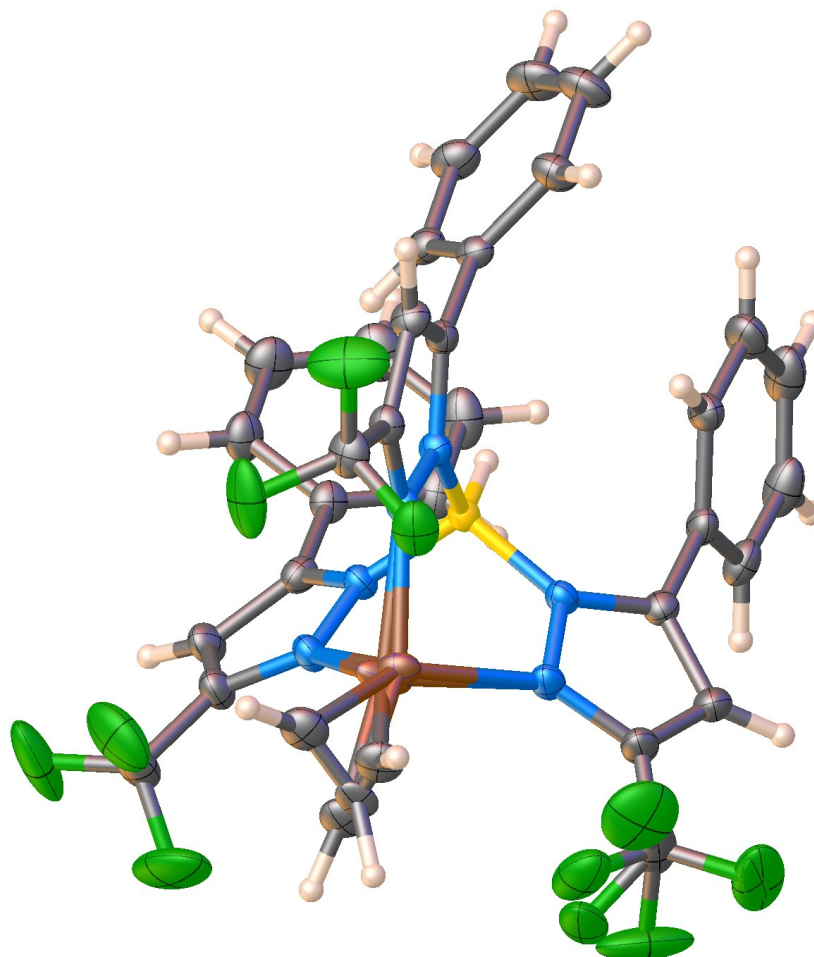

**Figure S40:** X-ray crystal structure of  $[\text{HB}(3\text{-(CF}_3\text{)},5\text{-(Ph)Pz})_3\text{Cu}(\text{C}_2\text{H}_2)$  (**14**).

Although the atom connectivities are clear, the crystal quality and data of  $[\text{HB}(3\text{-(CF}_3\text{)},5\text{-(Ph)Pz})_3\text{Cu}(\text{C}_2\text{H}_2)$  are poor and the copper-acetylene moiety disorder is significant, and therefore, the structure is not suitable for detailed analysis of the metrical parameters

**Table S17:** Crystal data and structure refinement for  $[\text{HB}(3\text{-(CF}_3\text{)},5\text{-(Ph)Pz})_3\text{Cu}(\text{C}_2\text{H}_2)\bullet\text{CH}_2\text{Cl}_2$  (**14** $\bullet\text{CH}_2\text{Cl}_2$ ).

|                     |                                                                |
|---------------------|----------------------------------------------------------------|
| Identification code | rad360_0m_a-DISORD                                             |
| Empirical formula   | $\text{C}_{33}\text{H}_{23}\text{BCl}_2\text{CuF}_9\text{N}_6$ |
| Formula weight      | 819.82                                                         |
| Temperature/K       | 100.05                                                         |
| Crystal system      | orthorhombic                                                   |
| Space group         | Pbcn                                                           |



## Supporting Information

|                                             |                                                                  |
|---------------------------------------------|------------------------------------------------------------------|
| a/Å                                         | 23.4988(11)                                                      |
| b/Å                                         | 16.9738(8)                                                       |
| c/Å                                         | 16.9704(8)                                                       |
| $\alpha$ /°                                 | 90                                                               |
| $\beta$ /°                                  | 90                                                               |
| $\gamma$ /°                                 | 90                                                               |
| Volume/Å <sup>3</sup>                       | 6768.9(6)                                                        |
| Z                                           | 8                                                                |
| $\rho_{\text{calc}}/\text{cm}^3$            | 1.609                                                            |
| $\mu/\text{mm}^{-1}$                        | 0.888                                                            |
| F(000)                                      | 3296.0                                                           |
| Crystal size/mm <sup>3</sup>                | 0.23 × 0.2 × 0.07                                                |
| Radiation                                   | Mo K $\alpha$ ( $\lambda = 0.71073$ )                            |
| 2 $\Theta$ range for data collection/°      | 5.64 to 53.462                                                   |
| Index ranges                                | -29 ≤ h ≤ 29, -21 ≤ k ≤ 21, -21 ≤ l ≤ 21                         |
| Reflections collected                       | 61854                                                            |
| Independent reflections                     | 6497 [ $R_{\text{int}} = 0.3051$ , $R_{\text{sigma}} = 0.2445$ ] |
| Data/restraints/parameters                  | 6497/103/552                                                     |
| Goodness-of-fit on F <sup>2</sup>           | 0.979                                                            |
| Final R indexes [ $I \geq 2\sigma(I)$ ]     | $R_1 = 0.0640$ , $wR_2 = 0.1318$                                 |
| Final R indexes [all data]                  | $R_1 = 0.1601$ , $wR_2 = 0.1477$                                 |
| Largest diff. peak/hole / e Å <sup>-3</sup> | 1.52/-1.04                                                       |

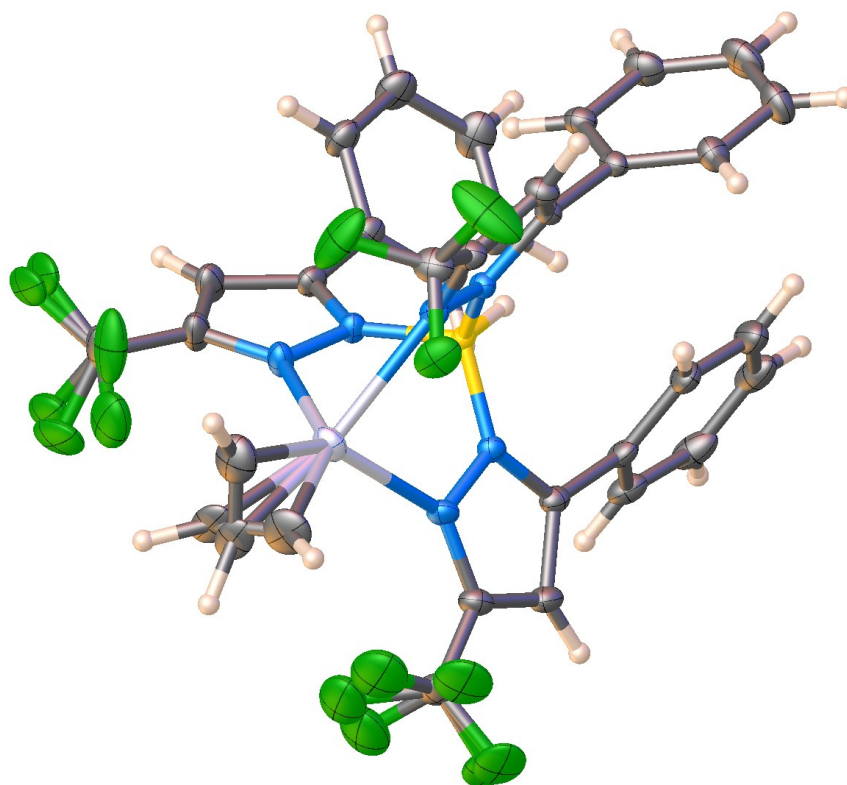

**Figure S41:** X-ray crystal structure of  $[\text{HB}(3\text{-(CF}_3\text{)},5\text{-(Ph)Pz})_3]\text{Ag}(\text{C}_2\text{H}_2)$  (**15**).

Although the atom connectivities are clear and the refinement is reasonably good for most standards, the silver-acetylene moiety disorder is significant, and therefore, the structure is not suitable for detailed analysis of the metrical parameters

**Table S18:** Crystal data and structure refinement for  $[\text{HB}(3\text{-(CF}_3\text{)},5\text{-(Ph)Pz})_3]\text{Ag}(\text{C}_2\text{H}_2)\cdot\text{CH}_2\text{Cl}_2$  (**15**•**CH<sub>2</sub>Cl<sub>2</sub>**).

|                     |                                                                |
|---------------------|----------------------------------------------------------------|
| Identification code | rad356a_Disord                                                 |
| Empirical formula   | $\text{C}_{33}\text{H}_{23}\text{AgBCl}_2\text{F}_9\text{N}_6$ |
| Formula weight      | 864.15                                                         |
| Temperature/K       | 99.99                                                          |
| Crystal system      | orthorhombic                                                   |
| Space group         | Pbcn                                                           |
| $a/\text{\AA}$      | 23.6982(8)                                                     |
| $b/\text{\AA}$      | 16.9056(6)                                                     |
| $c/\text{\AA}$      | 17.0298(6)                                                     |
| $\alpha/^\circ$     | 90                                                             |
| $\beta/^\circ$      | 90                                                             |

|                                               |                                                               |
|-----------------------------------------------|---------------------------------------------------------------|
| $\gamma/^\circ$                               | 90                                                            |
| Volume/ $\text{\AA}^3$                        | 6822.7(4)                                                     |
| Z                                             | 8                                                             |
| $\rho_{\text{calc}}/\text{cm}^3$              | 1.683                                                         |
| $\mu/\text{mm}^{-1}$                          | 0.832                                                         |
| F(000)                                        | 3440.0                                                        |
| Crystal size/ $\text{mm}^3$                   | $0.39 \times 0.2 \times 0.2$                                  |
| Radiation                                     | Mo K $\alpha$ ( $\lambda = 0.71073$ )                         |
| $2\Theta$ range for data collection/ $^\circ$ | 5.626 to 57.398                                               |
| Index ranges                                  | $-32 \leq h \leq 32, -22 \leq k \leq 22, -23 \leq l \leq 23$  |
| Reflections collected                         | 126066                                                        |
| Independent reflections                       | 8813 [ $R_{\text{int}} = 0.0706, R_{\text{sigma}} = 0.0213$ ] |
| Data/restraints/parameters                    | 8813/182/571                                                  |
| Goodness-of-fit on $F^2$                      | 1.052                                                         |
| Final R indexes [ $I \geq 2\sigma(I)$ ]       | $R_1 = 0.0467, wR_2 = 0.1245$                                 |
| Final R indexes [all data]                    | $R_1 = 0.0577, wR_2 = 0.1314$                                 |
| Largest diff. peak/hole / $e \text{\AA}^{-3}$ | 2.07/-1.78                                                    |

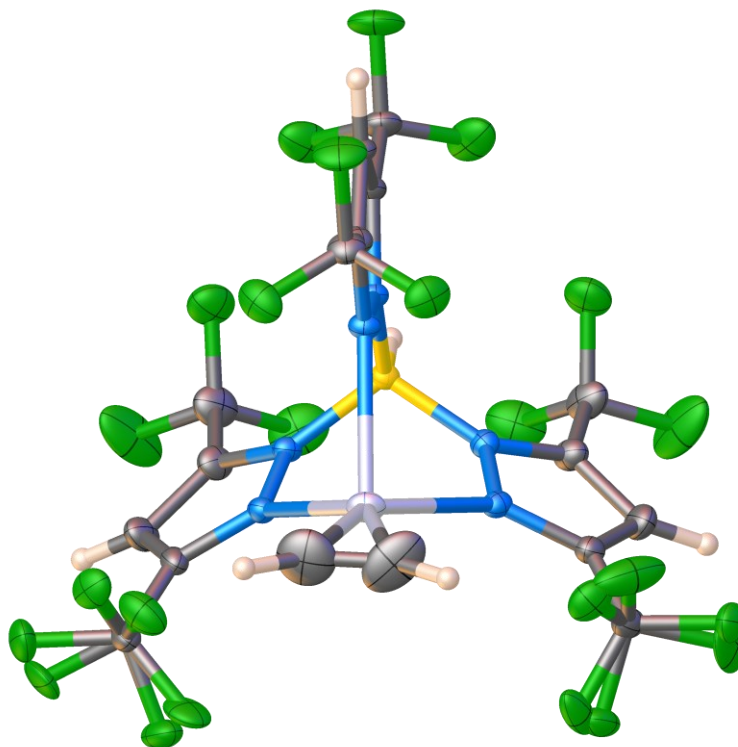

**Figure S42:** X-ray crystal structure of [HB(3,5-(CF<sub>3</sub>)<sub>2</sub>Pz)<sub>3</sub>]Ag(C<sub>2</sub>H<sub>2</sub>) (**5**) at 100 K.

A fresh high-resolution dataset of [HB(3,5-(CF<sub>3</sub>)<sub>2</sub>Pz)<sub>3</sub>]Ag(C<sub>2</sub>H<sub>2</sub>) (**5**) has been collected at 100 K (compared to the reported data at 183 K) to see if it is possible to minimize the libration and thermal smearing effects on the acetylene CC bond. However, the improvements were not noticeable as this molecule also suffers from a minor disorder of the acetylene moiety. The acetylene CC distance is 1.126(6) Å. This new dataset has been deposited at CCDC and can be obtained using the deposition number **2173359**.

**Crystal Data** for C<sub>17</sub>H<sub>6</sub>AgBF<sub>18</sub>N<sub>6</sub> (*M* = 754.96 g/mol): orthorhombic, space group P2<sub>1</sub>2<sub>1</sub>2<sub>1</sub> (no. 19), *a* = 8.1157(7) Å, *b* = 14.9432(14) Å, *c* = 19.7639(18) Å, *V* = 2396.9(4) Å<sup>3</sup>, *Z* = 4, *T* = 99.84 K, μ(Mo Kα) = 1.003 mm<sup>-1</sup>, *D*<sub>calc</sub> = 2.092 g/cm<sup>3</sup>, 27721 reflections measured (3.416° ≤ 2θ ≤ 61.016°), 7115 unique (*R*<sub>int</sub> = 0.0176, *R*<sub>sigma</sub> = 0.0156) which were used in all calculations. The final *R*<sub>1</sub> was 0.0256 (*I* > 2σ(*I*)) and *wR*<sub>2</sub> was 0.0649 (all data).

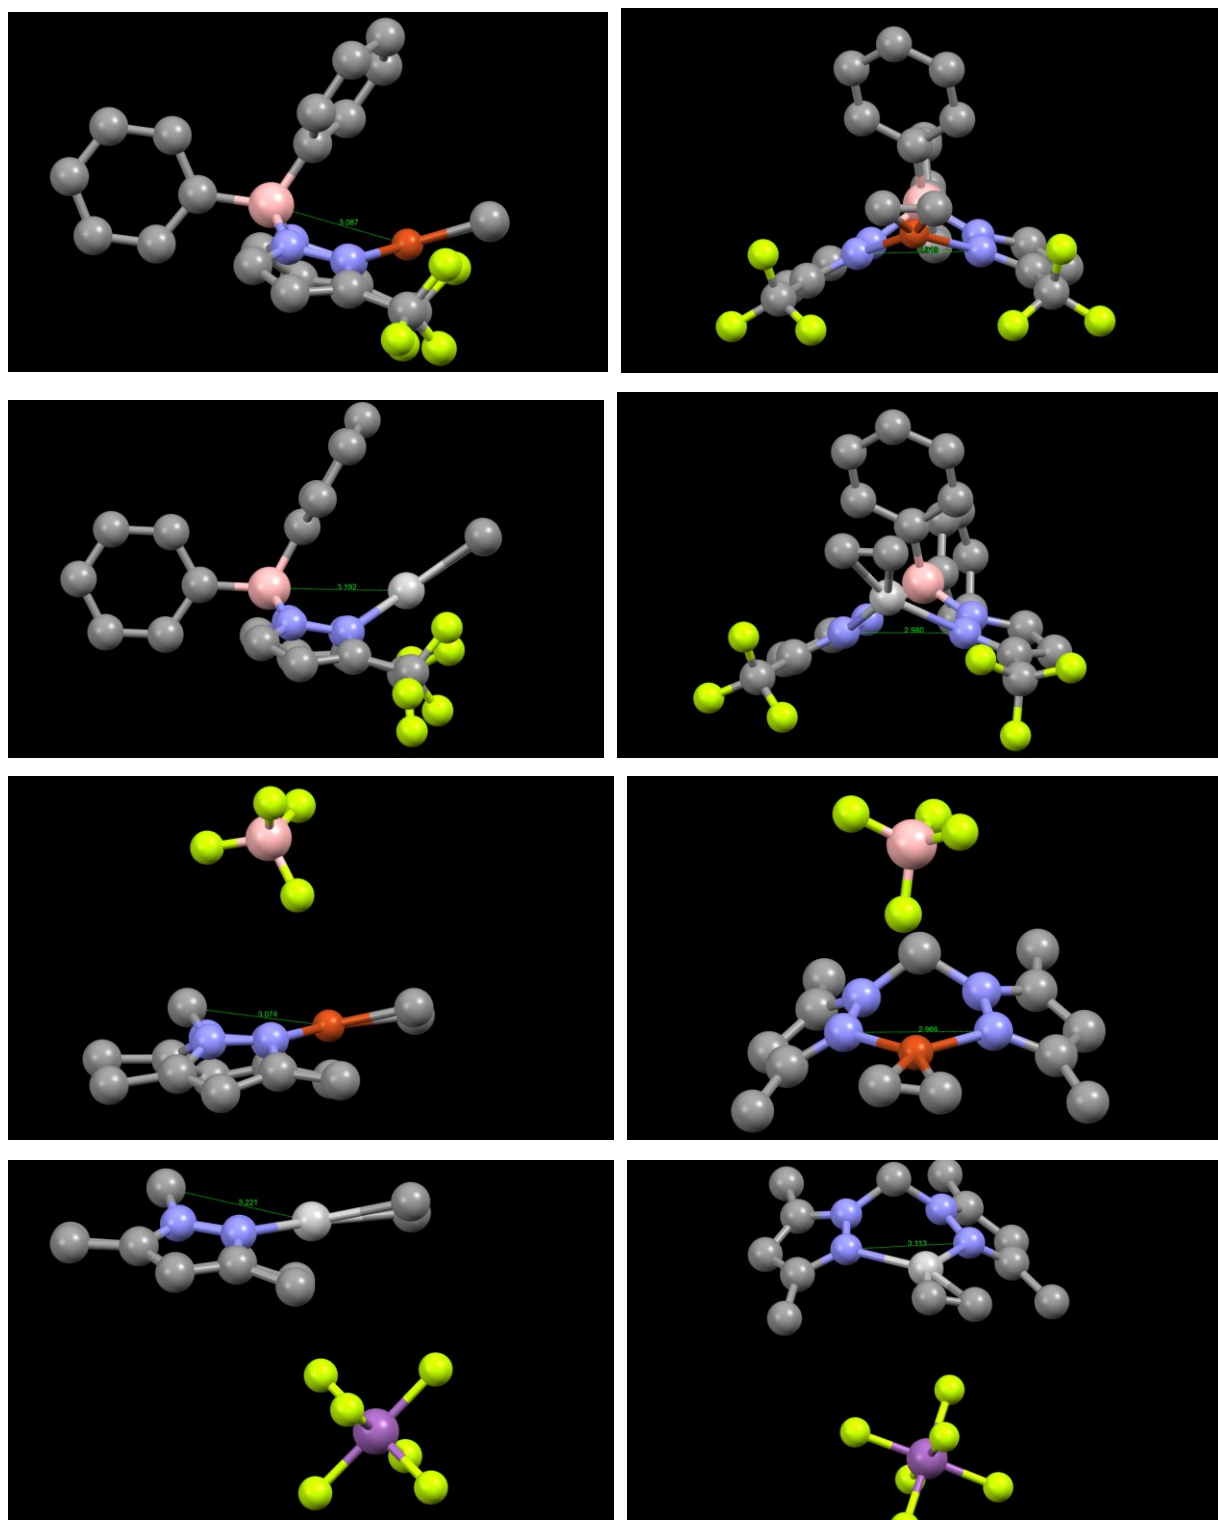

**Figure S43:** Views illustrating the differences in M(NN)B and M(NN)C cores of compounds  $[\text{Ph}_2\text{B}(3\text{-(CF}_3\text{)Pz})_2]\text{Ag}(\text{C}_2\text{H}_2)$  (**9**),  $[\text{Ph}_2\text{B}(3\text{-(CF}_3\text{)Pz})_2]\text{Ag}(\text{C}_2\text{H}_2)$  (**10**),  $[\{\text{H}_2\text{C}(3,5\text{-(Me)}_2\text{Pz})_2\}\text{Cu}(\text{C}_2\text{H}_2)][\text{BF}_4]$  (**11**), and  $[\{\text{H}_2\text{C}(3,5\text{-(Me)}_2\text{Pz})_2\}\text{Ag}(\text{C}_2\text{H}_2)][\text{SbF}_6]$  (**12**) (from top to bottom)

**Table S19.** The C≡C distance of structurally characterized copper and silver acetylene complexes with  $\eta^2$ -bound terminal acetylene ligands.

| Entry | Compound                                                                                                                                                                     | C≡C (Å)<br>bond length | Reference         |
|-------|------------------------------------------------------------------------------------------------------------------------------------------------------------------------------|------------------------|-------------------|
| 1     | [Ph <sub>2</sub> B(3-(CF <sub>3</sub> )Pz) <sub>2</sub> ]Cu(C <sub>2</sub> H <sub>2</sub> ) ( <b>9</b> )                                                                     | 1.217(3)               | This work         |
| 2     | [HB(3,5-(CF <sub>3</sub> ) <sub>2</sub> Pz) <sub>3</sub> ]Cu(C <sub>2</sub> H <sub>2</sub> ) ( <b>13</b> )                                                                   | 1.134(7)               | This work         |
| 3     | [{H <sub>2</sub> C(3,5-(CH <sub>3</sub> ) <sub>2</sub> Pz) <sub>2</sub> }Cu(C <sub>2</sub> H <sub>2</sub> )] [BF <sub>4</sub> ] ( <b>11</b> )                                | 1.203(4)               | This work         |
| 4     | [H <sub>2</sub> B(3,5-(CF <sub>3</sub> ) <sub>2</sub> Pz) <sub>2</sub> ]Cu(C <sub>2</sub> H <sub>2</sub> ) ( <b>4</b> )                                                      | 1.225(5)               | <sup>9</sup>      |
| 5     | Cu <sub>2</sub> ( $\mu$ -[4-Br-3,5-(CF <sub>3</sub> ) <sub>2</sub> Pz] <sub>2</sub> (C <sub>2</sub> H <sub>2</sub> ) <sub>2</sub> ) ( <b>3</b> )                             | 1.227(4)               | <sup>10</sup>     |
| 6     | [Cu{NH(Py) <sub>2</sub> }(C <sub>2</sub> H <sub>2</sub> )] [BF <sub>4</sub> ] ( <b>1</b> [BF <sub>4</sub> ])                                                                 | 1.188(11)              | <sup>11, 12</sup> |
| 7     | [Cu(phen)(C <sub>2</sub> H <sub>2</sub> )] [ClO <sub>4</sub> ] ( <b>2</b> [ClO <sub>4</sub> ])                                                                               | 1.190(7)               | <sup>13</sup>     |
| 8     | [Ph <sub>2</sub> B(3-(CF <sub>3</sub> )Pz) <sub>2</sub> ]Ag(C <sub>2</sub> H <sub>2</sub> ) ( <b>10</b> )                                                                    | 1.193(3)               | This work         |
| 9     | [HB(3,5-(CF <sub>3</sub> ) <sub>2</sub> Pz) <sub>3</sub> ]Ag(C <sub>2</sub> H <sub>2</sub> ) ( <b>5</b> )                                                                    | 1.143(14)              | <sup>5</sup>      |
| 10    | [{H <sub>2</sub> C(3,5-(CH <sub>3</sub> ) <sub>2</sub> Pz) <sub>2</sub> }Ag(C <sub>2</sub> H <sub>2</sub> )] [SbF <sub>6</sub> ] ( <b>12</b> )                               | 1.203(5)               | This work         |
| 11    | [Al(OC(CH <sub>3</sub> )(CF <sub>3</sub> ) <sub>2</sub> ) <sub>4</sub> ]Ag(C <sub>2</sub> H <sub>2</sub> ) ( <b>8</b> )                                                      | 1.2089(12)             | <sup>14</sup>     |
| 12    | [Ag(C <sub>2</sub> H <sub>2</sub> ) <sub>3</sub> ] [Al(OC(CF <sub>3</sub> ) <sub>3</sub> ) <sub>4</sub> ] ( <b>6</b> [Al(OC(CF <sub>3</sub> ) <sub>3</sub> ) <sub>4</sub> ]) | av. 1.123              | <sup>14</sup>     |
| 13    | [Ag(C <sub>2</sub> H <sub>2</sub> ) <sub>4</sub> ] [Al(OC(CF <sub>3</sub> ) <sub>3</sub> ) <sub>4</sub> ] ( <b>7</b> [Al(OC(CF <sub>3</sub> ) <sub>3</sub> ) <sub>4</sub> ]) | 1.092(7)               | <sup>14</sup>     |
| 14    | Free C <sub>2</sub> H <sub>2</sub>                                                                                                                                           | 1.20286(3)             | <sup>15</sup>     |

**Table S20.** The analysis of metal coordinated acetylene C≡C bond distance

The C≡C distances (Å) reported in the manuscript (in **bold**) and the effect on resolution (obtained from the refinement of X-ray data using various d values using Shelx SHEL 999 d command (where d represents resolution from Bragg's law,  $\lambda = 2d \sin \theta$ , for  $\lambda = 0.71073$  for Mo radiation) and the TLS distance considering the librational effect (based on librational analysis using TLS -Libr command in Olex2-1.5-dev for all the anisotropic atoms in each of the molecules).

| [HB(3,5-(CF <sub>3</sub> ) <sub>2</sub> Pz) <sub>3</sub> ]Cu(C <sub>2</sub> H <sub>2</sub> ) ( <b>13</b> ), 100K data                             |             |                |             |              |              |                        |                   |
|---------------------------------------------------------------------------------------------------------------------------------------------------|-------------|----------------|-------------|--------------|--------------|------------------------|-------------------|
|                                                                                                                                                   | Resolution  | angle 2θ (deg) | R1          | wR2          | GOOF         | CC distance from X-ray | CC (TLS distance) |
| <b>Reported</b>                                                                                                                                   | <b>0.67</b> | <b>64.1</b>    | <b>5.34</b> | <b>13.60</b> | <b>1.038</b> | <b>1.134(7)</b>        | 1.1344(11)        |
|                                                                                                                                                   | 0.66        | 64.7           | 5.41        | 14.05        | 1.053        | 1.135(7)               |                   |
|                                                                                                                                                   | 0.70        | 61.0           | 4.93        | 11.44        | 1.038        | 1.126(6)               |                   |
|                                                                                                                                                   | 0.77        | 55.0           | 4.22        | 9.49         | 1.070        | 1.115(6)               |                   |
|                                                                                                                                                   | 0.84        | 50.0           | 3.67        | 8.30         | 1.099        | 1.107(6)               | 1.1096(10)        |
| [Ph <sub>2</sub> B(3-(CF <sub>3</sub> )Pz) <sub>2</sub> ]Cu(C <sub>2</sub> H <sub>2</sub> ) ( <b>9</b> ), 100K                                    |             |                |             |              |              |                        |                   |
|                                                                                                                                                   | Resolution  | angle 2θ (deg) | R1          | wR2          | GOOF         | CC distance from X-ray | CC (TLS distance) |
| <b>Reported</b>                                                                                                                                   | <b>0.65</b> | <b>66.3</b>    | <b>3.31</b> | <b>8.57</b>  | <b>1.077</b> | <b>1.217(3)</b>        | 1.219(2)          |
|                                                                                                                                                   | 0.58        | 76.3           | 4.01        | 10.12        | 1.073        | 1.218(3)               |                   |
|                                                                                                                                                   | 0.70        | 61.0           | 3.08        | 8.05         | 1.071        | 1.215(3)               |                   |
|                                                                                                                                                   | 0.77        | 55.0           | 2.86        | 7.24         | 1.082        | 1.210(3)               |                   |
|                                                                                                                                                   | 0.84        | 50.0           | 2.67        | 6.53         | 1.064        | 1.202(4)               | 1.204(2)          |
| [Ph <sub>2</sub> B(3-(CF <sub>3</sub> )Pz) <sub>2</sub> ]Ag(C <sub>2</sub> H <sub>2</sub> ) ( <b>10</b> ), 100K                                   |             |                |             |              |              |                        |                   |
|                                                                                                                                                   | Resolution  | angle 2θ (deg) | R1          | wR2          | GOOF         | CC distance from X-ray | CC (TLS distance) |
| <b>Reported</b>                                                                                                                                   | <b>0.60</b> | <b>72.6</b>    | <b>3.54</b> | <b>8.12</b>  | <b>1.053</b> | <b>1.193(3)</b>        | 1.196(2)          |
|                                                                                                                                                   | 0.58        | 76.2           | 3.88        | 8.27         | 1.063        | 1.193(3)               |                   |
|                                                                                                                                                   | 0.70        | 61.0           | 2.56        | 6.46         | 1.051        | 1.189(3)               |                   |
|                                                                                                                                                   | 0.77        | 55.0           | 2.27        | 5.90         | 1.039        | 1.186(3)               |                   |
|                                                                                                                                                   | 0.84        | 50.0           | 2.08        | 5.58         | 1.048        | 1.182(4)               | 1.184(2)          |
| [H <sub>2</sub> C(3,5-(CH <sub>3</sub> ) <sub>2</sub> Pz) <sub>2</sub> ]Cu(C <sub>2</sub> H <sub>2</sub> )[BF <sub>4</sub> ] ( <b>11</b> ), 100K  |             |                |             |              |              |                        |                   |
|                                                                                                                                                   | Resolution  | angle 2θ (deg) | R1          | wR2          | GOOF         | CC distance from X-ray | CC (TLS distance) |
| <b>Reported</b>                                                                                                                                   | <b>0.73</b> | <b>58.3</b>    | <b>4.92</b> | <b>9.31</b>  | <b>1.072</b> | <b>1.203(4)</b>        | 1.2043(9)         |
|                                                                                                                                                   | 0.67        | 64.6           | 6.62        | 11.92        | 1.122        | 1.202(5)               |                   |
|                                                                                                                                                   | 0.70        | 61.0           | 5.58        | 10.36        | 1.098        | 1.202(4)               |                   |
|                                                                                                                                                   | 0.77        | 55.0           | 4.22        | 8.12         | 1.073        | 1.202(4)               |                   |
|                                                                                                                                                   | 0.84        | 50.0           | 3.35        | 6.79         | 1.079        | 1.200(4)               | 1.2008(7)         |
| [H <sub>2</sub> C(3,5-(CH <sub>3</sub> ) <sub>2</sub> Pz) <sub>2</sub> ]Ag(C <sub>2</sub> H <sub>2</sub> )[SbF <sub>6</sub> ] ( <b>12</b> ), 100K |             |                |             |              |              |                        |                   |
|                                                                                                                                                   | Resolution  | angle 2θ (deg) | R1          | wR2          | GOOF         | CC distance from X-ray | CC (TLS distance) |
| <b>Reported</b>                                                                                                                                   | <b>0.67</b> | <b>64.1</b>    | <b>3.52</b> | <b>7.44</b>  | <b>1.022</b> | <b>1.203(5)</b>        | 1.204(7)          |
|                                                                                                                                                   | 0.53        | 84.4           | 5.56        | 11.10        | 1.078        | 1.208(5)               |                   |
|                                                                                                                                                   | 0.70        | 61.0           | 3.24        | 6.92         | 1.019        | 1.199(5)               |                   |
|                                                                                                                                                   | 0.77        | 55.0           | 2.70        | 5.86         | 1.022        | 1.198(6)               |                   |
|                                                                                                                                                   | 0.84        | 50.0           | 2.34        | 5.10         | 1.036        | 1.200(6)               | 1.201(5)          |

## Computational Details

Geometry optimizations of the complexes were performed without symmetry constraints using the Gaussian09<sup>16</sup> optimizer together with Turbomole 7.1<sup>17</sup> energies and gradients at the BP86<sup>18, 19</sup>/def2-TZVPP<sup>20</sup> level of theory using the D3 dispersion correction suggested by Grimme et al.<sup>21</sup> and the resolution-of-identity (RI) approximation.<sup>22</sup> This level is denoted RI-BP86-D3/def2-TZVPP. Vibrational analysis was performed to ensure that the optimized geometry corresponds to an energy minimum. Natural Bond Orbital (NBO) calculations were carried out using the NBO6.0 program<sup>23</sup> at the BP86-D3/def2-TZVPP level using the optimized the RI-BP86-D3/def2-TZVPP geometries.

The interaction  $\Delta E_{\text{int}}$  between the selected fragments is analyzed with the help of the Energy Decomposition Analysis (EDA) method.<sup>24, 25</sup> Within this approach,  $\Delta E_{\text{int}}$  can be decomposed into the following physically meaningful terms:

$$\Delta E_{\text{int}} = \Delta E_{\text{elstat}} + \Delta E_{\text{Pauli}} + \Delta E_{\text{orb}} + \Delta E_{\text{disp}}$$

The term  $\Delta E_{\text{elstat}}$  corresponds to the classical electrostatic interaction between the unperturbed charge distributions of the deformed reactants and is usually attractive. The Pauli repulsion  $\Delta E_{\text{Pauli}}$  comprises the destabilizing interactions between occupied orbitals and is responsible for any steric repulsion. The orbital interaction  $\Delta E_{\text{orb}}$  accounts for electron-pair bonding, charge transfer (interaction between occupied orbitals on one moiety with unoccupied orbitals on the other, including HOMO–LUMO interactions), and polarization (empty-occupied orbital mixing on one fragment due to the presence of another fragment). Finally, the  $\Delta E_{\text{disp}}$  term takes into account the interactions which are due to dispersion forces. Moreover, the NOCV (Natural Orbital for Chemical Valence)<sup>26</sup> extension of the EDA method has been also used to further partition the  $\Delta E_{\text{orb}}$  term. The EDA-NOCV approach provides pairwise energy contributions for each pair of interacting orbitals to the total bond energy.

The program package AMS 2020.101<sup>27, 28</sup> was used for the EDA-NOCV calculations at the same BP86-D3 level, in conjunction with a triple- $\zeta$ -quality basis set using uncontracted Slater-type orbitals (STOs) augmented by two sets of polarization functions with a frozen-core approximation for the core electrons.<sup>29</sup> Auxiliary sets of s, p, d, f, and g STOs were used to fit the molecular densities and to represent the Coulomb and exchange potentials accurately in each SCF cycle. Scalar relativistic effects were incorporated by applying the zeroth-order regular approximation (ZORA).<sup>30-33</sup> This level of theory is denoted ZORA-BP86-D3/TZ2P//RI-BP86-D3/def2-TZVPP.



Cartesian coordinates (in Å) and total energies (in a. u., ZPVE included) of all the stationary points described in the text (RI-BP86-D3/def2-TZVPP).

[H<sub>2</sub>B(3,5-(CF<sub>3</sub>)<sub>2</sub>Pz)<sub>2</sub>]Cu(C<sub>2</sub>H<sub>2</sub>) (**4**): E= -3544.5019625

|    |              |              |              |
|----|--------------|--------------|--------------|
| Cu | -0.004800000 | -1.726243000 | 0.821695000  |
| F  | 3.539713000  | -2.719976000 | 0.441640000  |
| F  | 2.239654000  | -2.795030000 | -1.315557000 |
| F  | 4.254074000  | -1.938026000 | -1.476946000 |
| F  | -3.554048000 | -2.700859000 | 0.444817000  |
| F  | -4.265813000 | -1.916851000 | -1.473918000 |
| F  | -2.255913000 | -2.784516000 | -1.313375000 |
| N  | 1.272436000  | 0.820315000  | 0.463923000  |
| N  | 1.463944000  | -0.509654000 | 0.295831000  |
| N  | -1.268170000 | 0.826845000  | 0.463278000  |
| N  | -1.467228000 | -0.502149000 | 0.296481000  |
| C  | 2.639453000  | -0.667404000 | -0.344412000 |
| C  | 3.234524000  | 0.572316000  | -0.587941000 |
| H  | 4.177980000  | 0.779008000  | -1.074279000 |
| C  | 2.331144000  | 1.489529000  | -0.058027000 |
| C  | 3.165090000  | -2.027649000 | -0.679421000 |
| C  | -2.643485000 | -0.653882000 | -0.343806000 |
| C  | -3.231359000 | 0.588980000  | -0.588877000 |
| H  | -4.173463000 | 0.800568000  | -1.075739000 |
| C  | -2.322824000 | 1.501580000  | -0.059774000 |
| C  | -3.176700000 | -2.011591000 | -0.677175000 |
| H  | 0.001439000  | 0.759231000  | 2.323249000  |
| H  | 0.006134000  | 2.514869000  | 1.304749000  |
| C  | 0.614910000  | -3.442364000 | 1.551738000  |
| H  | 1.637874000  | -3.758842000 | 1.670198000  |
| C  | -0.632474000 | -3.438586000 | 1.553679000  |
| H  | -1.656890000 | -3.748830000 | 1.675835000  |
| B  | 0.003193000  | 1.320450000  | 1.248889000  |
| C  | -2.454726000 | 2.997932000  | -0.031307000 |
| F  | -3.625130000 | 3.358586000  | -0.624253000 |
| F  | -2.470964000 | 3.488105000  | 1.233457000  |

*Supporting Information*

|   |              |             |              |
|---|--------------|-------------|--------------|
| F | -1.452048000 | 3.617538000 | -0.699480000 |
| C | 2.471650000  | 2.985066000 | -0.028216000 |
| F | 1.474801000  | 3.610750000 | -0.699559000 |
| F | 2.486507000  | 3.474651000 | 1.236704000  |
| F | 3.646061000  | 3.339157000 | -0.617195000 |

[H<sub>2</sub>B(3,5-(CF<sub>3</sub>)<sub>2</sub>Pz)<sub>2</sub>]Ag(C<sub>2</sub>H<sub>2</sub>) (**4-Ag**): E= -2050.7774432

|    |              |              |              |
|----|--------------|--------------|--------------|
| Ag | -1.596112000 | -0.018941000 | 0.643016000  |
| F  | -2.370764000 | -3.554479000 | 0.463481000  |
| F  | -2.942090000 | -2.391355000 | -1.295894000 |
| F  | -2.119588000 | -4.412657000 | -1.539886000 |
| F  | -2.299486000 | 3.528507000  | 0.697662000  |
| F  | -2.044653000 | 4.512674000  | -1.246841000 |
| F  | -2.905827000 | 2.496382000  | -1.130246000 |
| N  | 0.983418000  | -1.292461000 | -0.559770000 |
| N  | -0.325543000 | -1.537600000 | -0.330216000 |
| N  | 1.002424000  | 1.276563000  | -0.488987000 |
| N  | -0.296984000 | 1.537545000  | -0.225291000 |
| C  | -0.623792000 | -2.714725000 | -0.909123000 |
| C  | 0.507046000  | -3.264188000 | -1.517617000 |
| H  | 0.596004000  | -4.199604000 | -2.052903000 |
| C  | 1.506528000  | -2.326977000 | -1.271166000 |
| C  | -2.010010000 | -3.269309000 | -0.826949000 |
| C  | -0.579210000 | 2.747339000  | -0.741325000 |
| C  | 0.553481000  | 3.302786000  | -1.340945000 |
| H  | 0.654255000  | 4.261238000  | -1.831600000 |
| C  | 1.536492000  | 2.334300000  | -1.156594000 |
| C  | -1.953105000 | 3.322948000  | -0.611634000 |
| H  | 1.458183000  | -0.059951000 | 1.270982000  |
| H  | 2.836624000  | -0.030559000 | -0.209950000 |
| C  | -3.339337000 | -0.659654000 | 1.765815000  |
| H  | -3.599979000 | -1.698506000 | 1.872185000  |
| C  | -3.322945000 | 0.579708000  | 1.812598000  |
| H  | -3.555467000 | 1.614298000  | 1.996953000  |
| B  | 1.676032000  | -0.029670000 | 0.079026000  |
| C  | 2.971265000  | 2.419965000  | -1.593937000 |
| F  | 3.178845000  | 3.608403000  | -2.225345000 |

*Supporting Information*

|   |             |              |              |
|---|-------------|--------------|--------------|
| F | 3.834920000 | 2.361028000  | -0.549556000 |
| F | 3.307346000 | 1.435978000  | -2.462263000 |
| C | 2.948583000 | -2.425626000 | -1.681547000 |
| F | 3.330917000 | -1.407401000 | -2.488255000 |
| F | 3.787286000 | -2.443716000 | -0.614879000 |
| F | 3.142420000 | -3.584854000 | -2.369161000 |

[H<sub>2</sub>B(3,5-(CH<sub>3</sub>)<sub>2</sub>Pz)<sub>2</sub>]Cu(C<sub>2</sub>H<sub>2</sub>) (**4'**): E= -3544.5019625

|    |              |              |              |
|----|--------------|--------------|--------------|
| Cu | -0.000768000 | -1.462810000 | -0.378043000 |
| N  | -1.261765000 | 1.104761000  | -0.389756000 |
| N  | -1.462353000 | -0.203322000 | -0.044964000 |
| N  | 1.262974000  | 1.103484000  | -0.390073000 |
| N  | 1.461905000  | -0.204670000 | -0.044570000 |
| C  | -2.619828000 | -0.278261000 | 0.642469000  |
| C  | -3.177140000 | 1.005897000  | 0.735479000  |
| H  | -4.104503000 | 1.286689000  | 1.222029000  |
| C  | -2.288578000 | 1.857246000  | 0.071721000  |
| C  | 2.619247000  | -0.280670000 | 0.642964000  |
| C  | 3.178142000  | 1.002843000  | 0.735340000  |
| H  | 4.105843000  | 1.282718000  | 1.221759000  |
| C  | 2.290630000  | 1.854960000  | 0.071167000  |
| H  | 0.000172000  | 0.797148000  | -2.236914000 |
| H  | 0.001302000  | 2.666020000  | -1.457276000 |
| C  | -0.628627000 | -3.252265000 | -0.822590000 |
| H  | -1.626187000 | -3.645105000 | -0.933194000 |
| C  | 0.626147000  | -3.252657000 | -0.822458000 |
| H  | 1.623509000  | -3.645721000 | -0.933779000 |
| B  | 0.000704000  | 1.480919000  | -1.228159000 |
| C  | -2.369798000 | 3.332936000  | -0.141604000 |
| H  | -2.414919000 | 3.582060000  | -1.210502000 |
| H  | -3.266685000 | 3.731583000  | 0.346735000  |
| H  | -1.490758000 | 3.846134000  | 0.271424000  |
| C  | -3.135099000 | -1.581946000 | 1.158830000  |
| H  | -3.812672000 | -2.060571000 | 0.435258000  |
| H  | -2.305351000 | -2.275018000 | 1.351211000  |
| H  | -3.693573000 | -1.441078000 | 2.092448000  |
| C  | 2.373690000  | 3.330436000  | -0.142878000 |

## Supporting Information

|   |             |              |              |
|---|-------------|--------------|--------------|
| H | 3.270516000 | 3.728359000  | 0.346138000  |
| H | 2.420176000 | 3.578860000  | -1.211893000 |
| H | 1.494782000 | 3.844906000  | 0.268850000  |
| C | 3.132709000 | -1.584660000 | 1.160363000  |
| H | 3.688221000 | -1.444335000 | 2.095834000  |
| H | 2.302201000 | -2.277571000 | 1.349933000  |
| H | 3.812388000 | -2.063128000 | 0.438693000  |

[H<sub>2</sub>B(3,5-(CH<sub>3</sub>)<sub>2</sub>Pz)<sub>2</sub>]Ag(C<sub>2</sub>H<sub>2</sub>) (**4-Ag'**): E= -2050.7774432

|    |              |              |              |
|----|--------------|--------------|--------------|
| Ag | -1.493240000 | -0.029752000 | -0.307157000 |
| N  | 1.264306000  | 1.285411000  | -0.432338000 |
| N  | -0.006847000 | 1.534209000  | 0.002889000  |
| N  | 1.305951000  | -1.246483000 | -0.435028000 |
| N  | 0.041087000  | -1.545688000 | -0.012534000 |
| C  | 0.018899000  | 2.663305000  | 0.737118000  |
| C  | 1.334128000  | 3.155780000  | 0.769605000  |
| H  | 1.690537000  | 4.050748000  | 1.267543000  |
| C  | 2.096064000  | 2.255463000  | 0.021589000  |
| C  | 0.104603000  | -2.672913000 | 0.722402000  |
| C  | 1.437330000  | -3.114606000 | 0.765504000  |
| H  | 1.823129000  | -3.997540000 | 1.262970000  |
| C  | 2.170446000  | -2.184223000 | 0.025458000  |
| H  | 0.747303000  | 0.011939000  | -2.230155000 |
| H  | 2.692763000  | 0.044044000  | -1.687796000 |
| C  | -3.506908000 | 0.590446000  | -0.686585000 |
| H  | -3.877139000 | 1.599035000  | -0.758816000 |
| C  | -3.507007000 | -0.657868000 | -0.699983000 |
| H  | -3.883227000 | -1.662276000 | -0.795669000 |
| B  | 1.546439000  | 0.024268000  | -1.309622000 |
| C  | -1.218868000 | 3.224645000  | 1.357759000  |
| H  | -1.533081000 | 4.152085000  | 0.856383000  |
| H  | -2.045755000 | 2.505255000  | 1.292207000  |
| H  | -1.058176000 | 3.462439000  | 2.417999000  |
| C  | 3.559310000  | 2.274172000  | -0.276584000 |
| H  | 3.749005000  | 2.325454000  | -1.357125000 |
| H  | 4.025929000  | 3.143439000  | 0.201528000  |
| H  | 4.055857000  | 1.366746000  | 0.093883000  |

## Supporting Information

|   |              |              |              |
|---|--------------|--------------|--------------|
| C | -1.111133000 | -3.260704000 | 1.360855000  |
| H | -1.108710000 | -3.102172000 | 2.449366000  |
| H | -2.020781000 | -2.796342000 | 0.957902000  |
| H | -1.167499000 | -4.343419000 | 1.185272000  |
| C | 3.634864000  | -2.149372000 | -0.265351000 |
| H | 3.831754000  | -2.196235000 | -1.344885000 |
| H | 4.095392000  | -1.223316000 | 0.105239000  |
| H | 4.130940000  | -2.999779000 | 0.217026000  |

[Ph<sub>2</sub>B(3-(CF<sub>3</sub>)Pz)<sub>2</sub>]Cu(C<sub>2</sub>H<sub>2</sub>) (**9**): E= -3332.2638014

|    |              |              |              |
|----|--------------|--------------|--------------|
| Cu | -1.487873000 | -0.000450000 | 0.424966000  |
| F  | -2.553816000 | -3.557254000 | 0.340814000  |
| F  | -3.125901000 | -2.267769000 | -1.330010000 |
| F  | -2.342054000 | -4.282041000 | -1.716052000 |
| F  | -2.554702000 | 3.558152000  | 0.341709000  |
| F  | -2.343890000 | 4.281045000  | -1.715976000 |
| F  | -3.126624000 | 2.266817000  | -1.327693000 |
| N  | 0.832219000  | -1.272394000 | -0.666615000 |
| N  | -0.500633000 | -1.451473000 | -0.481168000 |
| N  | 0.831855000  | 1.273244000  | -0.665673000 |
| N  | -0.501274000 | 1.451402000  | -0.481120000 |
| C  | -0.807296000 | -2.656516000 | -0.994986000 |
| C  | 0.337726000  | -3.278909000 | -1.507653000 |
| H  | 0.405055000  | -4.249995000 | -1.980486000 |
| C  | 1.358720000  | -2.362955000 | -1.272518000 |
| H  | 2.418628000  | -2.411586000 | -1.489048000 |
| C  | -2.203971000 | -3.184479000 | -0.932237000 |
| C  | -0.808119000 | 2.656926000  | -0.993735000 |
| C  | 0.337012000  | 3.280579000  | -1.504588000 |
| H  | 0.404238000  | 4.252327000  | -1.976075000 |
| C  | 1.358287000  | 2.364878000  | -1.269723000 |
| H  | 2.418347000  | 2.414373000  | -1.485286000 |
| C  | -2.205023000 | 3.184320000  | -0.931123000 |
| C  | 1.222403000  | -0.000365000 | 1.557833000  |
| C  | 1.093326000  | 1.199744000  | 2.281384000  |
| H  | 1.183532000  | 2.152917000  | 1.756253000  |
| C  | 0.830665000  | 1.205322000  | 3.653231000  |

*Supporting Information*

|   |              |              |              |
|---|--------------|--------------|--------------|
| H | 0.726430000  | 2.152902000  | 4.183560000  |
| C | 0.694558000  | -0.001719000 | 4.343964000  |
| H | 0.480926000  | -0.002248000 | 5.413244000  |
| C | 0.832440000  | -1.208108000 | 3.652381000  |
| H | 0.729465000  | -2.156187000 | 4.182062000  |
| C | 1.095038000  | -1.201205000 | 2.280559000  |
| H | 1.186547000  | -2.153873000 | 1.754741000  |
| C | 3.108204000  | 0.000656000  | -0.422407000 |
| C | 3.529102000  | 0.001812000  | -1.768752000 |
| H | 2.779523000  | 0.002573000  | -2.564197000 |
| C | 4.881678000  | 0.002134000  | -2.117140000 |
| H | 5.175099000  | 0.003177000  | -3.167906000 |
| C | 5.858400000  | 0.001179000  | -1.116226000 |
| H | 6.916128000  | 0.001578000  | -1.381676000 |
| C | 5.468119000  | -0.000095000 | 0.224749000  |
| H | 6.223060000  | -0.000682000 | 1.012166000  |
| C | 4.110503000  | -0.000283000 | 0.561683000  |
| H | 3.819581000  | -0.001517000 | 1.613216000  |
| C | -2.835452000 | -0.624352000 | 1.706445000  |
| H | -3.082830000 | -1.646994000 | 1.936477000  |
| C | -2.836955000 | 0.623552000  | 1.704646000  |
| H | -3.084731000 | 1.646123000  | 1.934616000  |
| B | 1.544169000  | 0.000299000  | -0.030699000 |

[Ph<sub>2</sub>B(3-(CF<sub>3</sub>)Pz)<sub>2</sub>]Ag(C<sub>2</sub>H<sub>2</sub>) (**10**): E= -1838.5381869

|    |              |              |              |
|----|--------------|--------------|--------------|
| Ag | 1.617344000  | 0.014372000  | 0.394462000  |
| F  | 1.988793000  | 4.455846000  | -1.767382000 |
| F  | 2.855194000  | 2.448538000  | -1.560134000 |
| F  | 2.341651000  | 3.602223000  | 0.222328000  |
| F  | 2.888701000  | -2.411869000 | -1.569171000 |
| F  | 2.415533000  | -3.551907000 | 0.233909000  |
| F  | 2.060474000  | -4.438948000 | -1.740254000 |
| N  | -1.007549000 | 1.272008000  | -0.687364000 |
| N  | 0.318726000  | 1.514452000  | -0.554485000 |
| N  | -0.988864000 | -1.300834000 | -0.674687000 |
| N  | 0.343004000  | -1.514757000 | -0.550252000 |
| C  | 0.548948000  | 2.732349000  | -1.072308000 |

Supporting Information

|   |              |              |              |
|---|--------------|--------------|--------------|
| C | -0.640475000 | 3.303093000  | -1.542677000 |
| H | -0.772073000 | 4.272154000  | -2.005797000 |
| C | -1.607026000 | 2.340081000  | -1.271387000 |
| H | -2.675451000 | 2.343336000  | -1.445623000 |
| C | 1.927471000  | 3.306638000  | -1.052506000 |
| C | 0.593496000  | -2.734601000 | -1.054130000 |
| C | -0.589183000 | -3.337989000 | -1.500486000 |
| H | -0.705567000 | -4.315892000 | -1.949095000 |
| C | -1.572486000 | -2.390450000 | -1.234713000 |
| H | -2.642221000 | -2.418153000 | -1.398575000 |
| C | 1.983219000  | -3.281322000 | -1.040866000 |
| C | -1.287840000 | -0.005004000 | 1.558683000  |
| C | -1.175126000 | 1.199705000  | 2.277369000  |
| H | -1.304622000 | 2.149024000  | 1.753640000  |
| C | -0.885505000 | 1.215685000  | 3.643966000  |
| H | -0.796340000 | 2.167139000  | 4.169931000  |
| C | -0.704177000 | 0.014741000  | 4.334925000  |
| H | -0.470300000 | 0.022618000  | 5.399865000  |
| C | -0.823830000 | -1.196332000 | 3.648293000  |
| H | -0.685498000 | -2.140155000 | 4.177419000  |
| C | -1.113425000 | -1.200001000 | 2.281477000  |
| H | -1.193867000 | -2.156788000 | 1.761472000  |
| C | -3.247700000 | -0.026959000 | -0.336258000 |
| C | -4.204154000 | -0.010477000 | 0.692118000  |
| H | -3.866005000 | 0.006434000  | 1.729189000  |
| C | -5.576020000 | -0.014481000 | 0.418161000  |
| H | -6.293504000 | -0.001224000 | 1.239605000  |
| C | -6.028107000 | -0.036112000 | -0.902843000 |
| H | -7.096821000 | -0.039481000 | -1.119225000 |
| C | -5.098321000 | -0.052974000 | -1.947358000 |
| H | -5.439496000 | -0.069240000 | -2.983364000 |
| C | -3.731452000 | -0.047512000 | -1.661451000 |
| H | -3.019600000 | -0.059854000 | -2.490618000 |
| C | 3.313212000  | 0.638048000  | 1.576067000  |
| H | 3.549653000  | 1.670868000  | 1.763346000  |
| C | 3.334773000  | -0.603066000 | 1.545698000  |
| H | 3.606336000  | -1.635386000 | 1.681448000  |
| B | -1.663569000 | -0.016056000 | -0.017628000 |

[{H<sub>2</sub>C(3,5-(CH<sub>3</sub>)<sub>2</sub>Pz)<sub>2</sub>}Cu(C<sub>2</sub>H<sub>2</sub>)<sup>+</sup> (**11+**): E= -2365.8999517

|    |              |              |              |
|----|--------------|--------------|--------------|
| Cu | -0.003152000 | -1.557138000 | -0.340753000 |
| N  | -1.198930000 | 1.079794000  | -0.406633000 |
| N  | 1.203495000  | 1.074764000  | -0.406586000 |
| N  | -1.451664000 | -0.229677000 | -0.090541000 |
| N  | 1.450929000  | -0.235778000 | -0.090580000 |
| C  | -0.632370000 | -3.381996000 | -0.700410000 |
| C  | -3.205436000 | -1.498189000 | 1.111905000  |
| H  | -3.936467000 | -1.901636000 | 0.396450000  |
| H  | -3.729722000 | -1.324153000 | 2.058434000  |
| H  | -2.430262000 | -2.256602000 | 1.276428000  |
| C  | 0.616285000  | -3.385292000 | -0.700932000 |
| C  | -2.607196000 | -0.232322000 | 0.600237000  |
| C  | -2.174945000 | 1.907864000  | 0.071442000  |
| C  | 2.606536000  | -0.243155000 | 0.600037000  |
| C  | 2.183002000  | 1.898800000  | 0.071364000  |
| C  | 0.002957000  | 1.385369000  | -1.155391000 |
| H  | 0.005198000  | 2.448110000  | -1.409684000 |
| H  | 0.001704000  | 0.791419000  | -2.080534000 |
| C  | 3.094503000  | 1.074257000  | 0.715897000  |
| H  | 4.004951000  | 1.389891000  | 1.211445000  |
| C  | -3.089713000 | 1.087060000  | 0.716194000  |
| H  | -3.998815000 | 1.406427000  | 1.211820000  |
| C  | 3.199593000  | -1.511344000 | 1.111926000  |
| H  | 2.422210000  | -2.268966000 | 1.269409000  |
| H  | 3.718040000  | -1.340755000 | 2.062329000  |
| H  | 3.934693000  | -1.913834000 | 0.400122000  |
| C  | -2.161791000 | 3.384469000  | -0.130297000 |
| H  | -1.265939000 | 3.848147000  | 0.306898000  |
| H  | -3.036347000 | 3.829285000  | 0.354924000  |
| H  | -2.199371000 | 3.652131000  | -1.196113000 |
| C  | 2.175923000  | 3.375439000  | -0.130427000 |
| H  | 2.216263000  | 3.642901000  | -1.196199000 |
| H  | 3.051432000  | 3.816853000  | 0.356177000  |
| H  | 1.281196000  | 3.842640000  | 0.305303000  |
| H  | -1.644570000 | -3.742573000 | -0.786457000 |



|   |             |              |              |
|---|-------------|--------------|--------------|
| H | 1.626314000 | -3.751750000 | -0.787790000 |
|---|-------------|--------------|--------------|

[{H<sub>2</sub>C(3,5-(CH<sub>3</sub>)<sub>2</sub>Pz)<sub>2</sub>}Ag(C<sub>2</sub>H<sub>2</sub>)<sup>+</sup> (**12+**): E= -872.1749758

|    |              |              |              |
|----|--------------|--------------|--------------|
| Ag | -1.581016000 | -0.007830000 | -0.261946000 |
| N  | 1.310911000  | -1.197538000 | -0.417181000 |
| N  | 0.031474000  | -1.521061000 | -0.051515000 |
| N  | 1.292776000  | 1.217888000  | -0.418070000 |
| N  | 0.005851000  | 1.533270000  | -0.070748000 |
| C  | 0.118878000  | -2.668570000 | 0.643204000  |
| C  | 1.467003000  | -3.080089000 | 0.711243000  |
| H  | 1.854081000  | -3.970107000 | 1.193245000  |
| C  | 2.209710000  | -2.126787000 | 0.032157000  |
| C  | -1.086437000 | -3.338524000 | 1.209626000  |
| H  | -0.940109000 | -3.568165000 | 2.272792000  |
| H  | -1.284128000 | -4.287477000 | 0.692194000  |
| H  | -1.973630000 | -2.700944000 | 1.115402000  |
| C  | 3.674938000  | -2.043997000 | -0.228844000 |
| H  | 3.900830000  | -2.037484000 | -1.304847000 |
| H  | 4.174544000  | -2.913765000 | 0.209595000  |
| H  | 4.120316000  | -1.144159000 | 0.218220000  |
| C  | 0.076484000  | 2.679745000  | 0.627572000  |
| C  | 1.421011000  | 3.099586000  | 0.715491000  |
| H  | 1.795402000  | 3.992090000  | 1.202948000  |
| C  | 2.179151000  | 2.151915000  | 0.045962000  |
| C  | -1.139484000 | 3.334346000  | 1.188509000  |
| H  | -2.044245000 | 2.771533000  | 0.929966000  |
| H  | -1.243540000 | 4.357763000  | 0.804340000  |
| H  | -1.077461000 | 3.398507000  | 2.283134000  |
| C  | 3.648279000  | 2.078626000  | -0.194709000 |
| H  | 4.093291000  | 1.183745000  | 0.262556000  |
| H  | 4.135745000  | 2.953608000  | 0.246978000  |
| H  | 3.889267000  | 2.069288000  | -1.267419000 |
| C  | 1.539555000  | 0.012049000  | -1.181902000 |
| H  | 0.877394000  | 0.007440000  | -2.058849000 |
| H  | 2.577919000  | 0.019114000  | -1.523219000 |
| C  | -3.635508000 | -0.660842000 | -0.533812000 |
| H  | -3.942137000 | -1.692186000 | -0.578502000 |

|   |              |             |              |
|---|--------------|-------------|--------------|
| C | -3.656091000 | 0.579627000 | -0.546592000 |
| H | -3.997808000 | 1.598766000 | -0.611894000 |

[HB(3,5-(CF<sub>3</sub>)<sub>2</sub>Pz)<sub>3</sub>]Cu(C<sub>2</sub>H<sub>2</sub>) (**13**): E= -4444.0383382

|    |              |              |              |
|----|--------------|--------------|--------------|
| Cu | -1.865345000 | 0.037413000  | -0.100050000 |
| F  | 3.565665000  | -1.502406000 | 1.839327000  |
| F  | -2.207347000 | -3.631401000 | -3.331386000 |
| F  | 3.073692000  | -3.101200000 | -2.839253000 |
| F  | -3.063536000 | -1.708822000 | -2.715094000 |
| F  | 3.402094000  | -0.824684000 | 3.915659000  |
| F  | -2.872950000 | -3.335863000 | -1.264713000 |
| F  | 3.340103000  | -0.966551000 | -2.430615000 |
| F  | -2.717641000 | -1.741632000 | 3.084052000  |
| F  | 3.407548000  | -2.410628000 | -0.788587000 |
| F  | -1.850082000 | -1.019184000 | 4.963993000  |
| N  | -0.676342000 | -1.257230000 | -1.101468000 |
| N  | 0.804223000  | -0.293448000 | 1.417745000  |
| N  | -0.519813000 | -0.345383000 | 1.692299000  |
| N  | 0.668041000  | -1.094356000 | -0.991629000 |
| C  | 0.339404000  | -2.765919000 | -2.441497000 |
| H  | 0.504066000  | -3.566752000 | -3.149215000 |
| C  | -0.877710000 | -2.260651000 | -1.970814000 |
| C  | -0.631583000 | -0.613100000 | 2.998937000  |
| C  | 0.629779000  | -0.741168000 | 3.599950000  |
| H  | 0.864798000  | -0.955015000 | 4.633827000  |
| C  | 1.297610000  | -1.996945000 | -1.797570000 |
| C  | -2.257721000 | -2.727904000 | -2.323492000 |
| C  | 1.521075000  | -0.531008000 | 2.558331000  |
| C  | 3.018511000  | -0.553187000 | 2.640625000  |
| C  | 2.787331000  | -2.109981000 | -1.955023000 |
| C  | -1.980383000 | -0.742584000 | 3.640840000  |
| C  | -3.714428000 | -0.651405000 | 0.233320000  |
| H  | -4.016442000 | -1.676071000 | 0.108282000  |
| B  | 1.260121000  | 0.001839000  | -0.040442000 |
| H  | 2.448840000  | 0.009040000  | -0.116682000 |
| F  | 3.572307000  | 0.636476000  | 2.293327000  |
| F  | -2.144346000 | 4.671937000  | -1.666201000 |

*Supporting Information*

|   |              |             |              |
|---|--------------|-------------|--------------|
| F | 3.126697000  | 3.929901000 | -1.392362000 |
| F | -3.026809000 | 2.672181000 | -1.842197000 |
| F | -2.828975000 | 3.610955000 | 0.124444000  |
| F | 3.368820000  | 1.803557000 | -1.855917000 |
| F | -2.711045000 | 0.399775000 | 3.531081000  |
| F | 3.435674000  | 2.483792000 | 0.222102000  |
| N | -0.655644000 | 1.601471000 | -0.520774000 |
| N | 0.686081000  | 1.391027000 | -0.483739000 |
| C | 0.385190000  | 3.497082000 | -1.174581000 |
| H | 0.563189000  | 4.507296000 | -1.516710000 |
| C | -0.840424000 | 2.864992000 | -0.936862000 |
| C | 1.330764000  | 2.527035000 | -0.876236000 |
| C | -2.212627000 | 3.450089000 | -1.085301000 |
| C | 2.822938000  | 2.674260000 | -0.970963000 |
| C | -3.708224000 | 0.565832000 | 0.474069000  |
| H | -4.001714000 | 1.564311000 | 0.745756000  |

[HB(3,5-(CF<sub>3</sub>)<sub>2</sub>Pz)<sub>3</sub>]Ag(C<sub>2</sub>H<sub>2</sub>) (**5**): E= -2950.3134672

|    |              |              |              |
|----|--------------|--------------|--------------|
| Ag | -2.002855000 | -0.073707000 | -0.220147000 |
| F  | 3.261825000  | -2.106579000 | 1.510180000  |
| F  | -1.588488000 | -4.156135000 | -3.011929000 |
| F  | 3.444541000  | -2.194965000 | -3.298546000 |
| F  | -2.660797000 | -2.260129000 | -2.757070000 |
| F  | 3.354112000  | -1.733654000 | 3.668859000  |
| F  | -2.333543000 | -3.561945000 | -1.033247000 |
| F  | 3.235142000  | -0.115310000 | -2.635141000 |
| F  | -2.703533000 | -1.527128000 | 3.212728000  |
| F  | 3.906639000  | -1.652758000 | -1.230927000 |
| F  | -1.816950000 | -0.656533000 | 5.018070000  |
| N  | -0.374013000 | -1.449834000 | -0.989191000 |
| N  | 0.874222000  | -0.261940000 | 1.446812000  |
| N  | -0.424749000 | -0.083039000 | 1.773235000  |
| N  | 0.904365000  | -1.005429000 | -0.987530000 |
| C  | 0.787442000  | -2.613741000 | -2.539617000 |
| H  | 1.043625000  | -3.314241000 | -3.322803000 |
| C  | -0.449927000 | -2.418323000 | -1.913989000 |
| C  | -0.566095000 | -0.519158000 | 3.029684000  |

*Supporting Information*

|   |              |              |              |
|---|--------------|--------------|--------------|
| C | 0.649575000  | -0.995569000 | 3.546636000  |
| H | 0.854963000  | -1.402950000 | 4.527498000  |
| C | 1.622483000  | -1.691185000 | -1.923061000 |
| C | -1.756050000 | -3.102241000 | -2.180089000 |
| C | 1.545526000  | -0.814312000 | 2.503165000  |
| C | 2.997095000  | -1.185949000 | 2.478112000  |
| C | 3.060139000  | -1.409998000 | -2.258216000 |
| C | -1.918375000 | -0.506800000 | 3.672969000  |
| C | -4.037685000 | -0.842415000 | 0.118060000  |
| H | -4.214041000 | -1.903020000 | 0.107060000  |
| B | 1.372500000  | 0.097666000  | 0.019506000  |
| H | 2.561820000  | 0.162679000  | 0.000877000  |
| F | 3.811835000  | -0.124523000 | 2.256722000  |
| F | -2.066119000 | 4.620743000  | -1.912418000 |
| F | 3.088281000  | 4.264006000  | -0.270145000 |
| F | -2.735034000 | 2.559948000  | -2.272158000 |
| F | -2.937897000 | 3.442440000  | -0.282708000 |
| F | 3.662726000  | 2.285150000  | -1.006991000 |
| F | -2.593408000 | 0.645407000  | 3.427764000  |
| F | 3.122999000  | 2.550470000  | 1.097196000  |
| N | -0.543872000 | 1.600804000  | -0.723040000 |
| N | 0.765162000  | 1.472992000  | -0.404977000 |
| C | 0.432324000  | 3.632734000  | -0.886476000 |
| H | 0.587678000  | 4.689902000  | -1.053726000 |
| C | -0.749406000 | 2.892353000  | -1.017937000 |
| C | 1.373027000  | 2.691057000  | -0.493011000 |
| C | -2.119209000 | 3.377829000  | -1.379579000 |
| C | 2.819387000  | 2.936095000  | -0.169518000 |
| C | -4.123925000 | 0.387978000  | 0.178299000  |
| H | -4.439118000 | 1.411987000  | 0.268518000  |

[HB(3-(CF<sub>3</sub>),5-(Ph)Pz)<sub>3</sub>]Cu(C<sub>2</sub>H<sub>2</sub>) (**14**): E= -4125.6687580

|    |              |              |              |
|----|--------------|--------------|--------------|
| Cu | -2.458821000 | 0.107041000  | 0.118693000  |
| F  | -2.655251000 | 4.911487000  | -1.008356000 |
| F  | -3.588791000 | 3.338039000  | 0.201563000  |
| F  | -3.368841000 | 3.068644000  | -1.957083000 |
| F  | -3.336358000 | -1.562031000 | -3.274363000 |

*Supporting Information*

|   |              |              |              |
|---|--------------|--------------|--------------|
| F | -2.423688000 | -3.503954000 | -3.729623000 |
| N | -1.252213000 | 1.666735000  | -0.323667000 |
| N | 0.176115000  | -0.899847000 | -1.165222000 |
| N | -1.144781000 | -1.143573000 | -1.336605000 |
| N | 0.084004000  | 1.447969000  | -0.202401000 |
| C | -0.150428000 | 3.599074000  | -0.726650000 |
| H | 0.047744000  | 4.642810000  | -0.932955000 |
| C | -1.395837000 | 2.965727000  | -0.635723000 |
| C | -1.229121000 | -2.068500000 | -2.301253000 |
| C | 0.043275000  | -2.443100000 | -2.761758000 |
| H | 0.286494000  | -3.145590000 | -3.548677000 |
| C | 0.782463000  | 2.602512000  | -0.432179000 |
| C | -2.750021000 | 3.567560000  | -0.842685000 |
| C | 0.932982000  | -1.667923000 | -2.016130000 |
| C | -2.566211000 | -2.560353000 | -2.758840000 |
| C | -4.303079000 | 0.275400000  | -0.623779000 |
| H | -4.610056000 | 0.999776000  | -1.357462000 |
| B | 0.625718000  | 0.006111000  | 0.000401000  |
| H | 1.810505000  | 0.039067000  | 0.045299000  |
| F | -2.649482000 | -1.360293000 | 4.814505000  |
| F | -3.525042000 | -0.006110000 | 3.326927000  |
| F | -3.443554000 | -2.154665000 | 2.931148000  |
| F | -3.282532000 | -3.125705000 | -1.746907000 |
| N | -1.251971000 | -0.561865000 | 1.594614000  |
| N | 0.083602000  | -0.550070000 | 1.345737000  |
| C | -0.149292000 | -1.190903000 | 3.465390000  |
| H | 0.049987000  | -1.535787000 | 4.471641000  |
| C | -1.394883000 | -0.952186000 | 2.872403000  |
| C | 0.783168000  | -0.930243000 | 2.459068000  |
| C | -2.750665000 | -1.111427000 | 3.483759000  |
| C | -4.299766000 | -0.657330000 | 0.196835000  |
| H | -4.600212000 | -1.477499000 | 0.824777000  |
| C | 2.249861000  | -1.011143000 | 2.504660000  |
| C | 2.977927000  | -1.670065000 | 1.499200000  |
| C | 2.947403000  | -0.402945000 | 3.561969000  |
| C | 4.370736000  | -1.689965000 | 1.531474000  |
| C | 4.342577000  | -0.436686000 | 3.600370000  |
| C | 5.057444000  | -1.071319000 | 2.580325000  |

*Supporting Information*

|   |             |              |              |
|---|-------------|--------------|--------------|
| H | 2.451788000 | -2.164270000 | 0.684167000  |
| H | 2.388421000 | 0.117689000  | 4.340122000  |
| H | 4.913747000 | -2.185829000 | 0.727613000  |
| H | 4.871687000 | 0.044806000  | 4.422937000  |
| H | 6.147209000 | -1.085047000 | 2.603975000  |
| C | 2.400382000 | -1.629102000 | -2.074219000 |
| C | 3.126746000 | -2.832851000 | -2.099047000 |
| C | 3.105983000 | -0.413339000 | -2.102075000 |
| C | 4.522079000 | -2.819392000 | -2.135483000 |
| C | 4.499437000 | -0.401723000 | -2.122529000 |
| C | 5.212817000 | -1.603813000 | -2.139401000 |
| H | 2.587448000 | -3.779986000 | -2.067999000 |
| H | 2.561797000 | 0.529361000  | -2.108473000 |
| H | 5.070571000 | -3.761465000 | -2.150215000 |
| H | 5.022322000 | 0.554054000  | -2.122684000 |
| H | 6.302788000 | -1.594085000 | -2.155152000 |
| C | 2.247046000 | 2.696871000  | -0.352201000 |
| C | 2.962050000 | 3.324327000  | -1.386277000 |
| C | 2.956526000 | 2.162742000  | 0.737723000  |
| C | 4.355567000 | 3.397274000  | -1.339746000 |
| C | 4.347808000 | 2.222782000  | 0.774670000  |
| C | 5.052034000 | 2.838811000  | -0.264210000 |
| H | 2.418698000 | 3.733543000  | -2.238452000 |
| H | 2.417075000 | 1.693075000  | 1.558507000  |
| H | 4.898120000 | 3.879759000  | -2.152804000 |
| H | 4.876770000 | 1.779920000  | 1.618060000  |
| H | 6.140813000 | 2.884152000  | -0.235787000 |

[HB(3-(CF<sub>3</sub>),5-(Ph)Pz)<sub>3</sub>]Ag(C<sub>2</sub>H<sub>2</sub>) (**15**): E= -2631.9431741

|    |              |              |              |
|----|--------------|--------------|--------------|
| Ag | 2.608711000  | 0.041555000  | -0.190196000 |
| F  | 2.395746000  | 4.844706000  | -1.623634000 |
| F  | 3.329110000  | 2.908703000  | -2.064995000 |
| F  | 3.191411000  | 3.602296000  | 0.001712000  |
| F  | 3.205290000  | 0.415639000  | 3.643060000  |
| F  | 2.267047000  | -0.951206000 | 5.080621000  |
| N  | 1.087147000  | 1.654098000  | -0.611452000 |
| N  | -0.287994000 | -0.119661000 | 1.481935000  |

*Supporting Information*

|   |              |              |              |
|---|--------------|--------------|--------------|
| N | 1.022382000  | -0.273262000 | 1.781894000  |
| N | -0.230028000 | 1.333251000  | -0.619938000 |
| C | -0.085855000 | 3.433822000  | -1.358186000 |
| H | -0.326307000 | 4.409346000  | -1.760471000 |
| C | 1.178844000  | 2.914971000  | -1.056573000 |
| C | 1.082028000  | -0.498805000 | 3.098082000  |
| C | -0.197738000 | -0.503010000 | 3.675451000  |
| H | -0.460502000 | -0.631784000 | 4.717687000  |
| C | -0.973704000 | 2.391860000  | -1.078968000 |
| C | 2.518416000  | 3.566153000  | -1.188345000 |
| C | -1.064721000 | -0.248175000 | 2.611664000  |
| C | 2.412448000  | -0.689007000 | 3.753914000  |
| C | 4.665896000  | 0.601308000  | 0.324627000  |
| H | 4.913724000  | 1.624408000  | 0.543494000  |
| B | -0.735777000 | 0.000021000  | 0.006053000  |
| H | -1.922360000 | -0.000495000 | -0.035186000 |
| F | 2.428221000  | -3.946631000 | -3.218994000 |
| F | 3.255330000  | -1.928377000 | -2.974867000 |
| F | 3.317747000  | -3.338706000 | -1.307567000 |
| F | 3.114194000  | -1.722958000 | 3.208279000  |
| N | 1.100323000  | -1.385181000 | -1.075171000 |
| N | -0.220744000 | -1.211545000 | -0.825356000 |
| C | -0.062190000 | -2.959223000 | -2.203173000 |
| H | -0.297638000 | -3.817604000 | -2.818841000 |
| C | 1.200682000  | -2.437078000 | -1.900105000 |
| C | -0.958184000 | -2.157300000 | -1.492248000 |
| C | 2.545035000  | -2.909571000 | -2.352713000 |
| C | 4.678582000  | -0.618476000 | 0.121588000  |
| H | 4.948145000  | -1.651779000 | -0.003270000 |
| C | -2.423417000 | -2.253926000 | -1.434407000 |
| C | -3.116926000 | -2.214112000 | -0.213013000 |
| C | -3.155169000 | -2.389140000 | -2.626797000 |
| C | -4.509007000 | -2.270941000 | -0.186953000 |
| C | -4.548763000 | -2.463134000 | -2.597620000 |
| C | -5.229503000 | -2.394452000 | -1.378492000 |
| H | -2.564308000 | -2.135522000 | 0.721492000  |
| H | -2.623607000 | -2.412820000 | -3.578480000 |
| H | -5.025066000 | -2.211575000 | 0.770656000  |

*Supporting Information*

|   |              |              |              |
|---|--------------|--------------|--------------|
| H | -5.103718000 | -2.562172000 | -3.530735000 |
| H | -6.318610000 | -2.437468000 | -1.357375000 |
| C | -2.528313000 | -0.125512000 | 2.632735000  |
| C | -3.294461000 | -1.072812000 | 3.334874000  |
| C | -3.191989000 | 0.920628000  | 1.968819000  |
| C | -4.687160000 | -0.983677000 | 3.358069000  |
| C | -4.583448000 | 0.997955000  | 1.977062000  |
| C | -5.336521000 | 0.046656000  | 2.671306000  |
| H | -2.788388000 | -1.892949000 | 3.844794000  |
| H | -2.615319000 | 1.679633000  | 1.443567000  |
| H | -5.266587000 | -1.728895000 | 3.903571000  |
| H | -5.074011000 | 1.806017000  | 1.435201000  |
| H | -6.424999000 | 0.107571000  | 2.677460000  |
| C | -2.434083000 | 2.369391000  | -1.238562000 |
| C | -3.200406000 | 3.452126000  | -0.774084000 |
| C | -3.089819000 | 1.288405000  | -1.852766000 |
| C | -4.590072000 | 3.444181000  | -0.904961000 |
| C | -4.478414000 | 1.274076000  | -1.966398000 |
| C | -5.233389000 | 2.351029000  | -1.492645000 |
| H | -2.699799000 | 4.290058000  | -0.288479000 |
| H | -2.510289000 | 0.452859000  | -2.241399000 |
| H | -5.171991000 | 4.288048000  | -0.533985000 |
| H | -4.965520000 | 0.413039000  | -2.423045000 |
| H | -6.319946000 | 2.338547000  | -1.580747000 |



## References

1. A. Noonikara-Poyil, A. Muñoz-Castro, A. Boretskyi, P. K. Mykhailiuk and H. V. R. Dias, *Chem. Sci.*, 2021, **12**, 14618-14623.
2. H. V. R. Dias, H.-L. Lu, H.-J. Kim, S. A. Polach, T. K. H. H. Goh, R. G. Browning and C. J. Lovely, *Organometallics*, 2002, **21**, 1466-1473.
3. J. Mehara, B. T. Watson, A. Noonikara-Poyil, A. O. Zacharias, J. Roithová and H. V. R. Dias, *Chem. Eur. J.*, 2022, **28**.
4. H. V. R. Dias and T. K. H. H. Goh, *Polyhedron*, 2004, **23**, 273-282.
5. H. V. R. Dias, Z. Wang and W. Jin, *Inorg. Chem.*, 1997, **36**, 6205-6215.
6. G. Sheldrick, *Acta Crystallogr. Sect. A: Found. Adv.*, 2015, **71**, 3-8.
7. G. Sheldrick, *Acta Crystallogr. Sect. C: Struct. Chem.*, 2015, **71**, 3-8.
8. O. V. Dolomanov, L. J. Bourhis, R. J. Gildea, J. A. K. Howard and H. Puschmann, *J. Appl. Cryst.*, 2009, **42**, 339-341.
9. A. Noonikara-Poyil, A. Muñoz-Castro and H. V. R. Dias, *Molecules*, 2021, **27**, 16.
10. D. Parasar, T. T. Ponduru, A. Noonikara-Poyil, N. B. Jayaratna and H. V. R. Dias, *Dalton Trans.*, 2019, **48**, 15782-15794.
11. J. S. Thompson and J. F. Whitney, *Inorg. Chem.*, 2002, **23**, 2813-2819.
12. J. S. Thompson and J. F. Whitney, *J. Am. Chem. Soc.*, 2002, **105**, 5488-5490.
13. M. Munakata, S. Kitagawa, I. Kawada, M. Maekawa and H. Shimono, *J. Chem. Soc., Dalton Trans.*, 1992, DOI: 10.1039/dt9920002225, 2225.
14. A. Reisinger, N. Trapp, I. Krossing, S. Altmannshofer, V. Herz, M. Presnitz and W. Scherer, *Angew. Chem. Int. Ed.*, 2007, **46**, 8295-8298.
15. J. Liévin, J. Demaison, M. Herman, A. Fayt and C. Puzzarini, *J. Chem. Phys.*, 2011, **134**, 064119.
16. M. J. Frisch, G. W. Trucks, H. B. Schlegel, G. E. Scuseria, M. A. Robb, J. R. Cheeseman, G. Scalmani, V. Barone, G. A. Petersson, H. Nakatsuji, X. Li, M. Caricato, A. V. Marenich, J. Bloino, B. G. Janesko, R. Gomperts, B. Mennucci, H. P. Hratchian, J. V. Ortiz, A. F. Izmaylov, J. L. Sonnenberg, Williams, F. Ding, F. Lipparini, F. Egidi, J. Goings, B. Peng, A. Petrone, T. Henderson, D. Ranasinghe, V. G. Zakrzewski, J. Gao, N. Rega, G. Zheng, W. Liang, M. Hada, M. Ehara, K. Toyota, R. Fukuda, J. Hasegawa, M. Ishida, T. Nakajima, Y. Honda, O. Kitao, H. Nakai, T. Vreven, K. Throssell, J. A. Montgomery Jr., J. E. Peralta, F. Ogliaro, M. J. Bearpark, J. J. Heyd, E. N. Brothers, K. N. Kudin, V. N. Staroverov, T. A. Keith, R. Kobayashi, J. Normand, K. Raghavachari, A. P. Rendell, J. C. Burant, S. S. Iyengar, J. Tomasi, M. Cossi, J. M. Millam, M. Klene, C. Adamo, R. Cammi, J. W. Ochterski, R. L. Martin, K. Morokuma, O. Farkas, J. B. Foresman and D. J. Fox, *Gaussian 09 Revision A. 1 ed.*, Wallingford, CT, 2009.
17. R. Ahlrichs, M. Bär, M. Häser, H. Horn and C. Kölmel, *Chem. Phys. Lett.*, 1989, **162**, 165-169.
18. A. D. Becke, *Phys. Rev. A*, 1988, **38**, 3098-3100.
19. J. P. Perdew, *Phys. Rev. B*, 1986, **33**, 8822-8824.
20. F. Weigend and R. Ahlrichs, *Phys. Chem. Chem. Phys.*, 2005, **7**, 3297.
21. S. Grimme, J. Antony, S. Ehrlich and H. Krieg, *J. Chem. Phys.*, 2010, **132**, 154104.
22. K. Eichkorn, O. Treutler, H. Öhm, M. Häser and R. Ahlrichs, *Chem. Phys. Lett.*, 1995, **242**, 652-660.
23. E. D. Glendening, C. R. Landis and F. Weinhold, *J. Comput. Chem.*, 2013, **34**, 1429-1437.

24. M. v. Hopffgarten and G. Frenking, *WIREs Comput. Mol. Sci.*, 2011, **2**, 43-62.
25. F. M. Bickelhaupt and E. J. Baerends, *Kohn-Sham Density Functional Theory: Predicting and Understanding Chemistry*, 2007.
26. M. P. Mitoraj, A. Michalak and T. Ziegler, *J. Chem. Theory Comput.*, 2009, **5**, 962-975.
27. G. te Velde, F. M. Bickelhaupt, E. J. Baerends, C. Fonseca Guerra, S. J. A. van Gisbergen, J. G. Snijders and T. Ziegler, *J. Comput. Chem.*, 2001, **22**, 931-967.
28. ADF2020, *SCM, Theoretical Chemistry*, Vrije Universiteit, Amsterdam, The Netherlands, <http://www.scm.com>.
29. J. G. Snijders, P. Vernooijs and E. J. Baerends, *At. Data Nucl. Data Tables*, 1981, **26**, 483-509.
30. E. v. Lenthe, E. J. Baerends and J. G. Snijders, *J. Chem. Phys.*, 1993, **99**, 4597-4610.
31. E. van Lenthe, E. J. Baerends and J. G. Snijders, *J. Chem. Phys.*, 1994, **101**, 9783-9792.
32. E. van Lenthe, A. Ehlers and E.-J. Baerends, *J. Chem. Phys.*, 1999, **110**, 8943-8953.
33. J. Krijn and E. J. Baerends, *Fit Functions in the HFS-Method, Internal Report (in Dutch)*, Vrije Universiteit Amsterdam, The Netherlands, 1984.
