# Supplementary material for: Isolable acetylene complexes of copper and silver
Source: Chem Sci. 2022 May 20;13(24):7190–203. doi: 10.1039/d2sc02377f (PMC9214850; doi:10.1039/d2sc02377f)
Supplement: SC-013-D2SC02377F-s002 [file SC-013-D2SC02377F-s002.xlsx]

## Sheet: Hoja1
r(acetylene)exp	1.20286
Dn	0	2.93071e+07	5413.6
Dr	0
r(spec)	1.20286
